# Supplementary material for: A Retrospective Cross-Sectional Study Assessing Self-Reported Adverse Events following Immunization (AEFI) of the COVID-19 Vaccine in Bangladesh
Source: MDPI journal article supplement (doi:10.3390/vaccines9101090), 2021-09-28
Supplement: s1 [file s1]

| Type of variables              | Variables                 | Outcome              | Frequency | Percentage (%) |
|--------------------------------|---------------------------|----------------------|-----------|----------------|
| Socio-demographical variables  | Gender                    | Male                 | 33        | 66             |
|                                |                           | Female               | 17        | 34             |
|                                | Age                       | 18-30 years          | 8         | 16             |
|                                |                           | 30-60 years          | 38        | 76             |
|                                |                           | >60 years            | 4         | 8              |
|                                | Area of residence         | Rural                | 12        | 24             |
|                                |                           | Urban                | 28        | 56             |
|                                |                           | Foreign              | 10        | 20             |
|                                | Educational qualification | Primary              | 1         | 2              |
|                                |                           | Secondary            | 1         | 2              |
|                                |                           | Higher secondary     | 2         | 4              |
|                                |                           | Undergraduate        | 4         | 8              |
|                                |                           | Graduate             | 17        | 34             |
|                                |                           | Postgraduate         | 25        | 50             |
| Pre-existing disease condition | Diseases                  | Allergy              | 1         | 2              |
|                                |                           | Anemia               | 1         | 2              |
|                                |                           | Asthma               | 3         | 6              |
|                                |                           | Ischemia             | 1         | 2              |
|                                |                           | Diabetes             | 11        | 22             |
|                                |                           | Hypertension         | 4         | 8              |
|                                |                           | Hepatic disease      | 1         | 2              |
|                                |                           | Seasonal flu         | 1         | 2              |
|                                | Disease free state        | Neurological problem | 1         | 2              |
|                                |                           | Yes                  | 29        | 58             |

|  |                                     |                    |    |    |
|--|-------------------------------------|--------------------|----|----|
|  |                                     | Could not identify | 2  | 4  |
|  | Fever                               | Yes                | 16 | 32 |
|  | Vertigo                             | Yes                | 6  | 12 |
|  | Pain at sight of injection          | Yes                | 24 | 48 |
|  | Drowsiness                          | Yes                | 6  | 12 |
|  | Nausea                              | Yes                | 3  | 6  |
|  | Burning sensation                   | Yes                | 3  | 6  |
|  | Itching                             | Yes                | 3  | 6  |
|  | Irritation at the site of injection | Yes                | 2  | 4  |
|  | Swelling                            | Yes                | 2  | 4  |
