# Supplementary material for: A Retrospective Cross-Sectional Study Assessing Self-Reported Adverse Events following Immunization (AEFI) of the COVID-19 Vaccine in Bangladesh
Source: Vaccines (Basel). 2021 Sep 28;9(10):1090. doi: 10.3390/vaccines9101090 (PMC8538494; doi:10.3390/vaccines9101090)
Supplement: Supplementary file 1 [file vaccines-09-01090-s001.zip › response.xlsx]

## Sheet: Form Responses 1
Timestamp	I consent voluntarily to participate in this study.	Your Name:	Your Age	Gender	Educational Qualifications	Area of Residence	Manufacturer Name:	Manufacturer Country	Vaccination Date	Vaccination Place /Center-	Vaccine Dose	Vaccine Dosage Form	Any specific information was given during vaccination	Were you a confirmed COVID-19 patient before the vaccination?	If yes, then what types of medication have you taken? Give in details.	If yes, were you given the ‘Plasma Therapy’? (Please mention the name of the plasma donor)	If not, did you have COVID-19-like symptoms before the vaccination?	Did you have any disease before the vaccination? (If yes, name the disease(s))	Were you taking any medications before the vaccination? (If yes, what were those?)	Have you taken any medication after the vaccination? (If yes, what are those?)	Do you have any allergy? (If yes, against what?)	Were you vaccinated before for any other illness.	Have you taken Pneumonia and / or Influenza vaccine during COVID-19 as a preventive measures to prevent coronavirus infection?	If yes, did you face any problems then? (Please mention the problems. )	Were you pregnant at the time of the vaccination?	If yes, did you face any abnormalities with the pregnancy after the vaccination?	Have you been breastfeeding after the vaccination?	During and/or after vaccination, did you face any type of physical discomfort?	Which of the following you have faced?	When did the problem start?	Do you still have this problem?	If yes, how do you manage it?	If no, how did it subside?	Have you taken any medicine for the problems?	How long did the problem go on?	Did you get affected by Covid-19 after taking the first dose?
2021-02-10 12:41:01	I Agree	Abul Kalam Azad Chowdhury PhD	65	Male	Post graduate/Doctoral	Urban	OXford & Astrozeneca	Serum Institute, India	2021-02-07	Bangabandhu Sheikh Mujib Medical University	First Dose	Injection	Watched for 30 minutes, advised to consult doctor if you feel bad	No			No	Moderate diabetes type 2	Amayril 3, comet 500	No medicine	No	No			No			No
2021-02-10 13:22:58	I Agree	Rouehan Shama	46	Male	Graduate	Urban	Serum Institute India	India	2021-02-09	NICVD	First Dose	Injection		No			No	no							No		No	Yes	Pain at the site of Injection, Vertigo (dizziness)	just 2 hour after vaccination	No		yes	Yes	only 1st day of vaccination
2021-02-10 14:05:09	I Agree	Riad Hasan jiku	38	Male	Undergrade	Urban	Covid19 vaccine	India	2021-02-09	Dhaka	First Dose	Injection		Yes			Yes	Jiku				Yes			No	No		Yes	Itching
2021-02-10 14:06:13	I Agree	Md.Mohiuddin Alamgir	52	Male	Graduate	Rural	Covi-sheild,serum	Institute india	2021-02-08	Upzila hospital,kachua	First Dose	Injection		No		No	Could not identify	Could not identify	No	No	No	No						Yes	Pain at the site of Injection, Fever
2021-02-10 15:31:28	I Agree	K. M. Yasif Kayes Sikdar	29	Male	Post graduate/Doctoral	Urban	Serum Institute of India	India	2021-02-10	BSMMU	First Dose	Injection	About next dose, side effects	No			No	Yes, Asthma	Yes, Salbutamol Inhaler	No	Yes, cold Allergy	No						Maybe
2021-02-10 17:09:45	I Agree	Md. Abdul Muhit	59	Male	Post graduate/Doctoral	Urban	Serum Institute India	India	2021-02-08	BSMMU	First Dose	Injection	Safety information	No			Could not identify	No	No	No	No	No		Pain in the injection site	No	No	No	Yes	Pain at the site of Injection, Irritation at the site of Injection	One day later	No	No		No	One day
2021-02-10 18:28:30	I Agree	Taniya Idris	34	Female	Graduate	Urban	Oxford-Astrazeneca	India	2021-02-09	Dhaka Medical	First Dose	Injection	To observe if any side-effects occur after vaccination	No			No	No	No	Yes, paracetamol	Hilsha,Brinjal etc.	No			No			Yes	Pain at the site of Injection, Irritation at the site of Injection, Swelling, Fever	After 7-8 hours of vaccination	Yes	Taking Paracetamol to alleviate pain		Yes	Still going on
2021-02-10 19:06:12	I Agree	Senjuti Barua	45	Female	Graduate	Urban	Siram institutions	India	2021-02-10	Shaheed Sarwardi Medical College and Hospital	First Dose	Injection	To avoid soap at injection site and contact with authority if any unwanted effects occur	Yes		No		Anemia	Iron supplement	Not yet	No	Yes		No significant problem	No	No	No	Yes	Pain at the site of Injection, Drowsiness	After 2-4 hours later	Yes	I am taking plenty of water		No	For 24 hours
2021-02-10 22:48:37	I Agree	Nusrat Ahmed	24	Female	Post graduate/Doctoral	Urban	Serum Institute of India	India	2021-02-10	BSMMU	First Dose	Injection	Probable side effects and what to do if any severe condition arises after vaccination	No			No	No	No	No	No	Yes		Mild fever and muscle pain	No		No	Yes	Pain at the site of Injection		No			No
2021-02-11 00:43:39	I Agree	Md. Yousuf Al Amin	28	Male	Post graduate/Doctoral	Urban	Serum institute	India	2021-02-02	Tangail	First Dose	Injection		No			No	No	No	No	No	Yes		No	No		No	No			No		Normally	No
2021-02-11 08:19:40	I Agree	Md Helal Biswas	54	Male	Post graduate/Doctoral	Foreign	pfizer	usa	2021-04-02	walgreens pharmacy, MA	First Dose	Injection	yes, i did not take any other vaccin last 3 weeks	No			No	no	no	no	no	No			No		No	Yes	Pain at the site of Injection		No			No	3 days
2021-02-11 08:27:07	I Agree	Fatema Begum	61	Female	Secondary	Rural	Covi-Shield,Serum	Institute India	2021-02-10	Upzila Hospital,Kachua	First Dose	Injection		No		No	Could not identify	No	No	No		No			No	No	No	Yes	Pain at the site of Injection, Fever	After 1hour		Some medicine		Yes
2021-02-11 08:31:34	I Agree	Mahmudul Hasan Milon	23	Male	Higher Secondary	Rural	Covi-Shield,Serum	Institute India	2021-02-10	Upzila Hospital,Kachua	First Dose	Injection		No			Could not identify	No	No	No		No			No	No	No	Yes	Pain at the site of Injection, Fever	After 1 hour		Some medicine
2021-02-11 15:52:58	I Agree	Raasheed Mahmood	34	Male	Post graduate/Doctoral	Urban	Serum Institute, India	India	2021-02-10	Bangabandhu Sheik Mujib Medical Hospital	First Dose	Injection	No	Yes		No		Diabetes										No
2021-02-11 19:07:07	I Agree	Shahnin Sultana	37	Female	Graduate	Urban	Serum Institute	Indian	2021-02-11	UHC Rupganj Narayanganj	First Dose	Injection		Yes		No	No	No	No	No	No	No			No	No	No	No
2021-02-11 23:47:17	I Agree	Saleha Islam	45	Female	Graduate	Foreign	Fizer	USA	2021-02-10	Canada	Second Dose	Injection	About the side effects. Specifically body ache and tiredness	No		No	No	No	No	No	No	Yes		Body ache	No	No	No	Yes	Pain at the site of Injection	After	No	Nothing	Nothing	No
2021-02-12 00:24:04	I Agree	Md. Younus Molla	57	Male	Graduate	Rural	America	America	2021-02-11	Cumilla Sadar Hospital	First Dose	Injection		No			No	Diabetes	Yes. Mixterd 30	No	No	No			No		No	No
2021-02-12 00:27:57	I Agree	Md. Shameem Iqbal	32	Male	Post graduate/Doctoral	Urban	Serum	India	2021-02-11	General Hospital Jessore	First Dose	Injection		No			No	High Blood persure, Diabetic, Escamia and Neurologycal	Diaryl 2, Maxpro 20, Tenormin 25, Ramoril 5	Pioz 30, Comet 1mg, Osartil 50 plus, Diaryl 2, Tenormin 25 : 1/2, Revotril . 25	No	No						Yes	Nausea	At 4pm	No			No	4 hours
2021-02-12 20:07:19	I Agree	Md Anisul Hasan	47	Male	Graduate	Urban	Covishield	India	2021-02-10	BSMMU	First Dose	Injection	Mild side effects	Yes		No	Yes	No	No	Paracetamol	No	Yes		No	No	No	No	Yes	Pain at the site of Injection, Fever, Other:	6 hours later	No	Paracetamol	Medication	Yes	2 days
2021-02-13 09:16:06	I Agree	Muhammad Faisal	55	Male	Graduate	Urban	Serum Institute	India	2021-02-11	NITOR, Dhaka	First Dose	Injection		Yes		No		No	No	No	No	Yes		No				Yes	Pain at the site of Injection, Burning sensation	Within one hour of vaccination	Yes	Nothing	Burning sensation went away itself and pain is reducing itself	No	Burning sensation 24 hours. Though reduced still pain is there after 48 hours
2021-02-13 13:28:44	I Agree	Sayema Khanum	51	Male	Post graduate/Doctoral	Urban	Astrageneca	UK	2021-02-13	NICVD	First Dose	Injection	To take rest 30 mins for observation	No			No	No	No	No		No			No		No	No
2021-02-13 15:48:40	I Agree	Hedayat Ullah	43	Male	Graduate	Urban	Serum Institute	India	2021-02-13	NICVD	First Dose	Injection	No	Yes		No	No	Hypertension	Amlodipine + Olmesartan, Vitamin C, Xinc		No	Yes		No	No	No		No
2021-02-13 16:30:03	I Agree	Prof Nurl Absar	69	Male	Post graduate/Doctoral	Urban	Oxford, Astreneka	Serum Institute, India	2021-11-02	CMC, Chattrog	First Dose	Injection	to stay for 30 min aftet vaccination	No			No	noi				No						No
2021-02-13 17:58:47	I Agree	মোহাম্মদ ফখর উদ্দিন	56	Male	Graduate	Rural	এষ্ট্রোজেনকা	UK & India	2021-02-10	Kachua Upazila Helth Centre	First Dose	Injection		No			No	no	no	no	no	No		no	No	No	No	No		no	No			No
2021-02-13 21:11:32	I Agree	Dr.Mohammad Abu Taher	37	Male	Post graduate/Doctoral	Urban	Oxford -Astrazeneca	England	2021-02-07	Mugda Medical College Hospital	First Dose	Injection	Next dose will be given on 08/03/21	Yes		Not given	No	No	No	Paracetamol, Antihistamine	Yes,Antihistamine taken	Yes		No				Yes	Pain at the site of Injection, Swelling, Itching, Fever, Other:	6 hours later after vaccination	Yes	Paracetamol, Antihistamine		Yes	7 days
2021-02-14 01:21:52	I Agree	Md.Shariful Islam	45	Male	Graduate	Rural	Serum institute	India	2021-02-13	Center	First Dose	Injection	No	No			No	No	No	Paracetamol	No	Yes		No	No	No	No	No
2021-02-14 19:17:17	I Agree	Md Akhtaruzzaman Prodhan	51	Male	Post graduate/Doctoral	Urban	Serum Institute	India	2021-02-13	Mirpur, Dhaka	First Dose	Injection	Regarding possible side effects	Yes		Not given		Not that I am aware of	No	No	No	No			No			Yes	Drowsiness, Other:	After 10-16 hours	No		After a good night sleep and a day	No	6-10 hours
2021-02-15 10:49:34	I Agree	Mohammad Didare Alam Muhsin	31	Male	Post graduate/Doctoral	Urban	অক্সফোর্ড-অ্যাস্ট্রাজেনেকা	India	2021-02-14	Sohrawardi Hospital	First Dose	Injection	Advised to take the 2nd dose after one month	No			Could not identify	Diabetes	Metformin, Linagliptin, Empagliflozin, Aspirin, Perindopril, Atorvastatin	No	No	Yes		Hepatitis				No
2021-02-15 13:43:53	I Agree	Syeda Farzana Siddique	46	Female	Post graduate/Doctoral	Urban	Astrazeneka formula, Serum India	India	2021-02-13	Jatio hrid rog institute	First Dose	Injection	Diabetic patient (me)	No		N/A	No	Diabetes	Comet ( Metformin 500mg), Thyrox 50	No	No	No		N/A	No	No	No	Yes	Pain at the site of Injection, Fever, Drowsiness	Pain after 6 hours, fever after 36 hours	No	N/A	Normally without any medicine	No	Lil bit pain still now, fever for 12 hours
2021-02-15 14:28:27	I Agree	Umme Sadia Jaynob	34	Female	Primary	Urban	Oxford-Astrazeneca	India	2021-09-02	BSMMU	First Dose	Injection		No			No	Asthma	Paracetamol 500mg & Fexofenadine HCl 120 mg tablet	No	No	No		Slight pain on left side of body ( vaccine took on left arm) including hand & leg	No	No	No	Yes	Pain at the site of Injection, Itching, Burning sensation	At 2nd day	No	Pain killer & antihistamine drug		Yes	2 days
2021-02-15 15:53:41	I Agree	Nasima Akther	45	Female	Higher Secondary	Urban	Serum Institute	India	2021-02-14	Feni Sadar Hospital,Feni	First Dose	Injection	No	No			Yes	Diabetes	Comet	Comet	Dirt	No			No			Yes	Pain at the site of Injection, Fever, Drowsiness		Yes	With Paracetamol		Yes
2021-02-15 15:59:24	I Agree	Md Rafiqul Islam Khan	31	Male	Post graduate/Doctoral	Urban	Oxford Astrazeneca	India	2021-02-15	Rajshahi medical college	First Dose	Injection	Please wait for 20 minutes for observation, nothing else more	No		N/A	No	Liver cirrhosis	Prednisolone, azathioprine, vitamin D, Ursochol, Z vit	No	No	Yes		No				No
2021-02-15 18:51:43	I Agree	Abdul Mannan	25	Male	Graduate	Rural	Covisheild	India	2021-02-13	Cox’s Bazar	First Dose	Injection	No	No			Yes	No										Yes	Pain at the site of Injection, Fever, Vertigo (dizziness)					Yes
2021-02-15 19:37:50	I Agree	Dr. Shaila Kabir	40	Female	Post graduate/Doctoral	Urban	Serum Institute of India	India	2021-02-14	BSMMU	First Dose	Injection		Yes		NO	Yes	Mild Diabetes	Metformin 500	Metformin 500	NO	Yes		NO	No		No	Yes	Fever, Vertigo (dizziness), Drowsiness	After 24 hrs	No			No	4 to 5 hrs
2021-02-15 19:47:59	I Agree	Md Riyadul Islam	39	Male	Post graduate/Doctoral	Rural	Oxford	India	2021-02-13	Upazilla Health Complex, Gosairhat, Shariatpur	First Dose	Injection		No			No	Allergy	Rupatadine	Paracetamol	Cold and rain	No			No			Yes	Pain at the site of Injection, Fever, Nausea	After 10 hours of vaccination	Yes	Taking paracetamol		Yes	two days
2021-02-15 19:55:14	I Agree	Zohra Kabir	62	Female	Graduate	Urban	Serum Institute of India	India	2021-02-14	BSMMU	First Dose	Injection	In case of emergency plz consult with the physician	Yes		No	Yes	Diabetes and hypertension	1. Diamicron MR 60 mg 2.Glipita M 50/500 3. Empa 10 mg 4. Betapro 2.5 5. Pregaba 50 6. Osteo D 1000 U 7. Ecospirin 8. Atova 10	As above	No	Yes		Mild fever	No	No	No	Yes	Burning sensation, Fever, Nausea, Vertigo (dizziness), Drowsiness	After 12 hours	Yes	By taking medicine such as NAPA 500 mg		Yes	Still suffering
2021-02-15 20:02:18	I Agree	Dr. Abu Naser Md. Hamidul Kabir	51	Male	Post graduate/Doctoral	Urban	Serum Institute of India	Inida	2021-02-14	BSMMU	First Dose	Injection	Emergency contact number was provided	Yes		No	Yes	No	No	No	No	Yes		No				No
2021-02-15 20:20:43	I Agree	Md. Parvez Kabir	57	Male	Post graduate/Doctoral	Urban	Serum Institute, India	India	2021-02-11	Sowrawardi Medical College Hospital	First Dose	Injection	Wait for 30 minutes after vaccination	No		N/A	No	No	No	No	No	No		Only pain in arm	No	No	No	Yes	Pain at the site of Injection	After about 6 hours	No	Taking paracetamol tablet		Yes	4 days
2021-02-15 20:33:55	I Agree	Arghya Pratim Bhattacharjee	47	Male	Graduate	Urban	Serum Institute India	India	2021-02-15	Ashan Ullah Master General Hospital, Tongi	First Dose	Injection		No			No	No	No	No	No	No			No			Yes	Pain at the site of Injection, Vertigo (dizziness)	After 2/3 hours	No			No
2021-02-15 20:55:33	I Agree	Hajera 6	28	Female	Undergrade	Rural	Serum institute of India pvt ltd	India	2021-08-02	Rangpur, Sador	First Dose	Injection	If high blood pressure, diabetes, asthma are not controlled, vaccine can not be administrated	No		No	No	No	No	Paracetamol	No	Yes		Fever, pain	No	No	No	Yes	Pain at the site of Injection, Fever
2021-02-15 20:58:57	I Agree	Hajera 6	21	Female	Undergrade	Rural	Serum institute of India pvt ltd	India	2021-08-02	Rangpur, Sador	First Dose	Injection	If high blood pressure, diabetes, asthma are not controlled, vaccine can not be administrated	No		No	No	No	No	Paracetamol	No	Yes		Fever, pain	No	No	No	Yes	Pain at the site of Injection, Fever
2021-02-15 21:25:25	I Agree	Nahid Islam Nira	25	Female	Undergrade	Urban	Chaina	Chaina	2021-02-28	Birampur	First Dose	Injection	No	Yes		Yes, babul	Could not identify	No	Pharmacy	No	Yes, dust and food Allergy	No						Yes	Pain at the site of Injection	Now	No	Dont know	Nothing	No	3 month
2021-02-15 22:25:33	I Agree	Md.Humayun Kabir	36	Male	Post graduate/Doctoral	Urban	Oxford-Astrazeneca	India	2021-02-15	Kachua,Upajela Hospital	First Dose	Injection	No	No			Could not identify	No	Nononot	Not	Not	No			No			No
2021-02-15 22:55:57	I Agree	Shammi Akter	48	Female	Graduate	Urban	Serum Institute (Oxford-Astrazeneca)	India	2021-02-14	Upzilla Health Complex, Gosairhat	First Dose	Injection	No information	No			No	No	No	Paracitamol	No	Yes		No	No		No	Yes	Fever, Vertigo (dizziness)	After 24 hours	Yes	By taking paracitamol		Yes	For 3 days
2021-02-16 06:52:37	I Agree	Kazi Nazrul Islam	59	Male	Post graduate/Doctoral	Urban	Serum Institute	India	2021-02-13	Shaheed Suhrawardi Medical College Hospital	First Dose	Injection		No			Could not identify	Asma	No	No	Cold allergy.	No		No	No	No	No	No						No
2021-02-16 12:21:53	I Agree	MD. Abdul Khaleque	41	Male	Post graduate/Doctoral	Rural	India (only single manufacturer's vaccine in BD now)	India	7/2/0021	250 bed Dadar Hospital, Pabna	First Dose	Injection		No			No	No	Nexum, Timex, Macron, Mounted, Fexo	Nexum, Timex, Macron, Mounted, Fexo	No	Yes		No				No						No
2021-02-16 12:37:49	I Agree	Tahmina Aktar	33	Female	Graduate	Rural	ChAdoxnCov19	India	8/2/0021	Dadar Hospital Pabna	First Dose	Injection		No		No	Could not identify	Diabetes, blood pressure high	For the above diseases	Not for vaccine	No (Not for vaccine)	Yes		No	No	No	No	Yes	Pain at the site of Injection, Fever	From night	Yes	Headache		No	4 day s
2021-02-16 13:13:09	I Agree	Abu Hamad Md. Zakaria Shaheed	56	Male	Post graduate/Doctoral	Urban	Oxdord	India	2021-02-11	Rangpur Sador Hospital	First Dose	Injection		No			No	No										No
2021-02-16 14:09:57	I Agree	Dr. Nargis Sultana Chowdhury	44	Female	Post graduate/Doctoral	Urban	Oxford AstraZeneca	India	2021-02-16	Kurmitola General Hospital	First Dose	Injection	Take rest for 15 minutes.	No			No	Seasonal flu	Azithromycin	No	No	No			No		No	No
2021-02-16 17:14:05	I Agree	Md. Mijanur Rahman Badal	34	Male	Post graduate/Doctoral	Urban	Indian	India	2021-02-16	Government Kormochari Hospital, Fulbaria, Dhaka	First Dose	Injection	No	No		N/A	No	No	No	No	No	No		N/A				No
2021-02-17 08:02:57	I Agree	abdullah al Naser	48	Male	Graduate	Urban	Oxford	England	2021-02-15	Kalapara upazila health complex	First Dose	Injection	No physical reaction or no syndrome	No		No	No	Pre diabetes	2 hour before tab.alcet 10mg	No	No	No		No	No	No		No
2021-02-17 21:01:57	I Agree	Debasish Kumar Nath	51	Male	Post graduate/Doctoral	Urban	Covishield	Serum Institute of India	2021-02-17	250 bed TB hospital, shamoli, dhaka	First Dose	Injection	No side effect	No			No	No	No	No	No	No		No	No	No	Yes	No			No			No
2021-02-17 23:47:05	I Agree	Anik Biswas	27	Male	Post graduate/Doctoral	Rural	Astrazeneca	India	2021-02-17	Kaliakoir upazila sastho complex	First Dose	Injection	A date has been given for the 2nd dose	No			Yes	No	No	No	No	Yes		No				No
2021-02-18 00:30:03	I Agree	MD RASHIDUL ISLAM	49	Male	Graduate	Rural	Serum Institute India (Astrazeneca/Oxford)	Indial	2021-02-15	NICVD	First Dose	Injection	Fever and body ach may happen but nothing to worry	No			No	High Blood Pressure	Telmesartan and amlodipine 40/5 tablet, Rosuvastatin 10 mg tablet	Same as previous	Dust mite	Yes		No	No	No	No	Yes	Pain at the site of Injection	After 5-6 hours of the injection	No			No	72 hours
2021-02-18 09:07:32	I Agree	Rumana akter	35	Female	Graduate	Rural	Oxford-Astrazeneca	bangladesh	2021-02-19	chandpur sodor hospital	First Dose	Injection		No				dabatic	no	no	yes	No		dabatic	No	No	No	No						No
2021-02-18 11:22:07	I Agree	Md Mojammel Hoque	41	Male	Post graduate/Doctoral	Urban	Oxford astrazenneca	India	2021-02-18	National Cardiovascular Institute	First Dose	Injection	No	Yes		No		No	No	No	No	Yes						No
2021-02-18 12:35:30	I Agree	Muhammad Easin Ibne Massud	31	Male	Graduate	Urban	Seram	India	2021-02-17	Shishu Hospital	First Dose	Injection	No	No			No	No	No	Yes, Napa	No	No						Yes	Fever, Other:	After 10 hours	Yes			Yes	36 hours
2021-02-18 16:13:52	I Agree	Ahsan ullah	56	Male	Graduate	Urban	Covishield	India	2021-02-09	জাতীয় চক্ষু বিজ্ঞান ইন্সটিটিউট; আগারগাঁও; ঢাকা।	First Dose	Injection	No	Yes		No	No	Diabatic;BP;Gastric; Ashma	Diabatic;BP;Gastric> Tablet	Diabatic;BP;Gastric> Tablet	not identified	No						No		Not applicable	No	Not applicable	Not applicable	No	Not applicable
2021-02-18 20:58:30	I Agree	Md.Mansur	32	Male	Post graduate/Doctoral	Rural	Serum Institute	India	2021-02-18	Muladi Health Complex	First Dose	Injection	Not Mention	No			No	No	No	No	Yes, Skin Allergy	No	No					No		Not mentioned	No	N/a	N/a	No	N/a
2021-02-19 12:18:58	I Agree	Mahmudun Nobi	39	Male	Post graduate/Doctoral	Urban	Oxford Astragenica	India	2021-02-16	National institute of Neuroscience Hospital	First Dose	Injection		No			No	No	No	Paracetamol	No	Yes	No					Yes	Pain at the site of Injection, Drowsiness	After an hour	No	Paracetamol medication
2021-02-19 20:35:19	I Agree	Prof Mokles (Dummy)	43	Male	Post graduate/Doctoral	Urban	hjkljkljlkja	India	2021-02-17	Dhaka	First Dose	Injection	hojuojoioi	Yes	jlj;l;l	hkjhjhkj		No										Yes	Pain at the site of Injection
2021-02-20 11:25:27	I Agree	Arif	57	Male	Graduate	Urban	Serum Institute	India	2021-02-17	Upozilla Health Complex, Pakundia	First Dose	Injection	N/A	No			No	No	No	Paracetamol 500 mg Tablet	No	No	No					Yes	Pain at the site of Injection, Fever, Drowsiness	After 3-4 hr from Vaccination	No		Very less symptoms	No	3 days
2021-02-20 11:48:17	I Agree	MD. ZAKIR HOSSAIN MAYAZI	60	Male	Graduate	Urban	SERUM	INDIA	2021-02-20	KACHUA.HEALTH complex	First Dose	Injection		No	No	No	No	Blood parser	No	No	Yes	No	No					No		No	No		No	No
2021-02-20 12:02:59	I Agree	Thamidur Rahman Chowdhury	23	Male	Graduate	Urban	Seram	India	2021-02-18	Mirpur 1	First Dose	Injection	No	No	No	No	Could not identify	Allergy	No	No	Yes	No	No	No	No	No	No	Yes	Itching		Yes			No
2021-02-20 16:56:06	I Agree	Sharin Sara fatima	58	Female	Graduate	Urban	Serum institute ltd India	India	2021-02-17	Dhaka	First Dose	Injection	No	No			No	No	No	yes, paracetamol	No	No	No		No		No	Yes	Pain at the site of Injection, Other:	At night, 16 hours after vaccination I had sever headache	No		By taking 2 tab of paracetamol	Yes	For 2 hours
2021-02-20 19:27:52	I Agree	Md.Nurul Alam	49	Male	Post graduate/Doctoral	Urban	Oxford Astrazenca	Serum Institute , India .	2021-02-01	Shaheed Suhrawardy Medical College Hospital.	First Dose	Injection	Vaccination point should be increased.	No			No	No	Thyroxin , Losaratin Potassium , Calcium .			Yes	No		No		No	No						No
2021-02-21 09:47:27	I Agree	Umme Hafsa	32	Female	Post graduate/Doctoral	Urban	Serum Institute of India PVT. Ltd.	India	2021-02-17	Nagar Matrisadan, Khilgaon, Dhaka	First Dose	Injection	No	No			No	No	No	Paracetamol 675mg	No	Yes	No		No			No
2021-02-22 16:18:45	I Agree	মো.জহিরুল ইসলাম	34	Male	Post graduate/Doctoral	Rural	covi-shield,serum institute	india	2021-02-22	উপজেলা স্বাস্থ্য কমপ্লেক্স,কচুয়া,চাঁদপুর।১	First Dose	Injection		No	না			না			না				No	No	No	No		না	No
2021-02-22 16:25:47	I Agree	ফাতেমা আক্তার	54	Female	Post graduate/Doctoral	Rural	covi-shield serum	india	2021-02-22	উপজেলা স্বাস্থ্য কমপ্লেক্স,কচুয়া,চাঁদপুর।	First Dose	Injection		No				না							No	No	No	No
2021-02-23 20:36:01	I Agree	মোহাম্মদ জাকির হোসেন	59	Male	Post graduate/Doctoral	Urban	কোভিশেল্ড।	ভারত।	2021-02-23	উপজেলা স্বাস্থ্য কমপ্লেক্স হাজিগঞ্জ।	First Dose	Injection	না	No			No	ডায়াবেটিস।			এলার্জির একটু সমস্যা আছে। এলাট্রল ও রিবোটিল খাই। রিবোটিল খাই	No						yes	Pain at the site of Injection
2021-02-24 08:40:24	I Agree	Mufti masum billah	35	Male	Post graduate/Doctoral	Rural	Covi-shield-19	India	2021-02-17	Upzila hospital.kachua	First Dose	Injection	No	No	N0	No	Could not identify	No	No	No	No	No	No	No	No	No	No	Yes	Pain at the site of Injection					No
2021-02-24 18:48:36	I Agree	Reza	31	Male	Post graduate/Doctoral	Urban	Serum Institute	India	2021-02-22	Unity Through Population Services, Uttara	First Dose	Injection		No			No	No	No	No	No	Yes	No					Yes	Pain at the site of Injection, Fever	After 20hrs	No		By taking only one paracetamol	Yes	2 days
2021-02-25 00:29:24	I Agree	Md. Nasir Uddin	23	Male	Undergrade	Urban	Serum Institute	India	2021-02-23	Matri sadan, nari moitree, Moghbazar	First Dose	Injection	No	No			Could not identify	Do not want to share	Yes. Do not want to share	Yes		Yes	No					Yes	Pain at the site of Injection, Swelling, Fever, Drowsiness, Decreased appetite, Intussusception (folding of intestine)	At night.	Yes	Paracetamol and taking fluids.		Yes	Still going 1 day ++
2021-02-25 16:41:00	I Agree	Md Saifuddin Ahmed	46	Male	Graduate	Urban	Serum Institute	India	2021-02-25	Sheikh Hasina National Burn and plastic Surgery Institute	First Dose	Injection		No			Could not identify	Diabetes	Insulin 5 unit	Paracetamol 665mg	No	No	No	No				No
2021-02-26 00:32:17	I Agree	Md Azharul Islam Khan	33	Male	Post graduate/Doctoral	Urban	Chadox	India	2021-02-16	BAPSA	First Dose	Injection	No	No			Yes	No		Yes	No	No	No		No	No	No	Yes	Pain at the site of Injection		No			No
2021-02-26 10:58:29	I Agree	Md. Hassan Kawsar	37	Male	Post graduate/Doctoral	Urban	Serum Institute	India	2021-09-02	Infectious Disease Hospital, Mohakhali, Dhaka	First Dose	Injection	Call them in any abnormalities.	Yes	A. Ivermectin 6 mg (Seabo 6): 2 tables at a time and then after 12 hrs take 1 tablet. B. Doxycycline 100 mg (Dixicap 100): Take 1 capsule every after 12 hrs. for 10 days. C. Levofloxacin 750 mg (Trevox): Take 1 tablet every after 24 hrs. for 10 days. D. Rivaroxaban 10 mg (Rivarox 10): Take 1 tablet every after 24 hrs. for 28 days. E. Paracetamol 650 mg (Napa extend): Take 1 tablet with minimum 6 …	Not needed		Hypertension	Losartan Potassium	Paracetamol	No, only fever and pain in the body	No	No					Yes	Pain at the site of Injection, Fever, Other:	After 12 hours	Yes	Taking Paracetamol		Yes	Still going
2021-02-26 18:40:17	I Agree	Md. Mahmudur Rahman	29	Male	Graduate	Rural	Serum Institute, India	India	2021-02-18	Rajshahi Medical college Hospital	First Dose	Injection		Yes	1. Monas, 2. Ambroxol, 3. Inhaler, 4. Vitamin D, 4. Zinc tablet, 5. Fexofenadine tablet and etc	No	No	No	No	No	Food and dust allergy.	Yes	No	No				Yes	Pain at the site of Injection, Burning sensation	30-40 minute after vaccination	No		Normally, No treatmemt need	No	After 2-3 days
2021-02-26 20:56:22	I Agree	Khaleda Khanum	32	Female	Graduate	Urban	Serum Institute of India pvt.ltd.	India	2021-02-22	Mohammadpur Fertility Centre	First Dose	Injection	Wait for 20 minutes after vaccination, no massage or heat or cold therapy can not applied to the injected area even if there is any pain	No			Could not identify	Back pain, allergy	Antihistamine, montelukast, ppi, sedative	Antihistamine, montelukast, ppi, sedatives, paracetamol	Yes against dust and food mainly	Yes	No		No		No	Yes	Pain at the site of Injection, Irritation at the site of Injection, Swelling, Burning sensation, Fever, Nausea, Decreased appetite, Other:	After the day of vaccination	No		Taking paracetamol	Yes	3 days almost
2021-02-26 21:02:44	I Agree	MD. Abdur Rouf	40	Male	Graduate	Urban	Not known	India	2021-02-10	National eye Institute and hospital	First Dose	Injection	Wait for 20 minutes after vaccination, no massage or heat or cold therapy can not applied to the injected area even if there is any pain	No			Could not identify	Diabetes, asthma	Montelukast, doxyphylline, vildagiptine, metformin, gliclazide, ppi	Montelukast, doxyphylline, vildagiptine, metformin, gliclazide, ppi	Yes Against dust and cold	Yes	No		No		No	No
2021-02-27 15:35:42	I Agree	Md.Moniruzzaman	55	Male	Graduate	Urban	Fizer	England	2021-02-27	Shaid shoroardi medical College Hospital	First Dose	If pain or fever than paracetamol tablets		No			Yes	No	No	No	No	No	No					No
2021-02-27 18:19:51	I Agree	Mandira Mukutmoni	27	Female	Post graduate/Doctoral	Urban	Oxford-AstraZeneca	India (Serum Institute of India)	2021-02-25	BSMMU	First Dose	Injection	Not to rub & not to use any chemicals for three days at the injection site.	No			Yes	Asthma, Tachycardia	Montene, Tofen, Azmasol	Tamen Turbo		Yes	Yes	No	No			Yes	Pain at the site of Injection, Fever, Nausea, Decreased appetite, Other:	Within 6 hours of the shot	No		Through medication	Yes	24 hours
2021-02-28 17:25:13	I Agree	Hosneara Meri	55	Female	Higher Secondary	Rural	Serum institute	India	2021-02-16	District Sadar Hospital, kurigram	First Dose	Injection	No	No			No	No			No	Yes	No		No	No	No	Yes	Pain at the site of Injection, Swelling, Fever, Vertigo (dizziness), Drowsiness, Decreased appetite	After the vaccination	No			Yes	3 days
2021-02-28 17:35:36	I Agree	Hosneara Meri	44	Female	Higher Secondary	Rural	Serum Institute	India	2021-02-16	District Sadar Hospital,kurigram	First Dose	Injection	NO	No			No	NO	No	Paracetamol 500 mg	no	Yes	No		No	No	No	Yes	Pain at the site of Injection, Swelling, Fever, Drowsiness, Decreased appetite	After the vaccination	No		Taking paracetamol	Yes	3 days
2021-02-28 18:19:28	I Agree	Mohd.Abul KalamAzad	49	Male	Post graduate/Doctoral	Urban	Covid shield	India	2021-02-27	Dhaka	First Dose	Injection	Yes	No			No	Diabetes	Navicard	No	No	No	No					No
2021-03-01 17:47:47	I Agree	Abu Zafar Mazumder	35	Male	Post graduate/Doctoral	Urban	Astrozeneca	Coviedshield	2021-02-23	Sarkari armachari hospital, fulbaria	First Dose	Injection	No	No	No	No	No	High cholesterol	No	Paracetamol	Yes	Yes	No	No				Yes	Pain at the site of Injection, Fever, Vertigo (dizziness)	After 8 hr of vaccination	No	Paracetamol	No	Yes	72 hrs
2021-03-01 20:25:49	I Agree	Kazi Nihar Uddin	68	Male	Graduate	Urban	Serum Institute India	India	2021-02-20	Sheikh Hasina Burn Institute	First Dose	Injection		Yes	Favipiravir, Clarithromycin, Azithromycin, Dexamethasone, Paracetamol, Vitamin A.	No		Hyperlipidemia	Pantoprazole, Atorvastatin.	No	No	Yes	No					No
2021-03-02 09:41:07	I Agree	Md. Shah Amran	57	Male	Post graduate/Doctoral	Urban	Oxford-Astrazeneka	SI, India	2021-02-13	BSMMU	First Dose	Injection	Wait for 30 min, If any complications arises, then call at the given cell phone number.e	No	NA	NA	No	No	Abacab, 5/20mg/24h	No	no	Yes	No	na				Yes	Pain at the site of Injection, Irritation at the site of Injection, Swelling, Fever, Nausea, Pain at the joint of fingers	12h after vaccination	No			No	7 dys
2021-03-03 16:28:22	I Agree	A K M ALLAMA Iqbal	45	Male	Post graduate/Doctoral	Urban	Covishield from Serum India	Serum India	2021-02-20	Kurt Motri Hospital, Uttara	First Dose	Injection	Not remarkable	No	Ivermectin 18mg and Doxycycline 500mg	Not applicable	No	No	No	No	No	No	No					Yes	Pain at the site of Injection		No			No
2021-03-03 16:29:34	I Agree	Samir Kumar Sadhu	43	Male	Post graduate/Doctoral	Rural	Serum Institute	India	2021-03-02	KMCH	First Dose	Injection	No	No			No	No				Yes	No					Yes	Pain at the site of Injection, Drowsiness	After 2 hours	Yes	With time it will be alright		No	Still continuing
2021-03-03 16:38:52	I Agree	S. M. Noor Hossain	37	Male	Post graduate/Doctoral	Urban	Serum Institute (Astra Zeneca-Oxford Vaccine)	India	2021-02-09	DMCH	First Dose	Injection	Nothing Significant	No			No	Diabetes (Under Control), Hyperlipidemia	Linagliptin, Rosuvastatin, Vit C, D, Zinc, Povidone Iodine Mouth Wash, Ivermectin 12 mg monthly	Continuing the previous medicines i.e. Linagliptin, Rosuvastatin, Vit C, D, Zinc, Povidone Iodine Mouth Wash, Ivermectin 12 mg monthly	No	Yes	No		No		No	No
2021-03-03 16:55:10	I Agree	Md. Rikibul Hasan	39	Male	Graduate	Urban	Serum Institute	India	2021-02-10	DMCH	First Dose	Injection		No			No	No				Yes	No					Yes	Pain at the site of Injection, Fever, Drowsiness	Shivering, headache and fatigue	No				3 days
2021-03-03 16:56:28	I Agree	S M MAHFUZUR RAHMAN	34	Male	Post graduate/Doctoral	Urban	SERUM INSTITUTE (OXORD ASTRAZENECA)	INDIA	2021-02-16	SHISHU HOSPITAL, SHYAMOLI, DHAKA	First Dose	Injection	N/A	No			No	DIABETIC AND HYPERTENSIVE	YES, IVERMECTIN, VITAMIN D, VITAMIN C, ZINC, PNEUMONIA VACCINE, FLU VACCINE	NO	NO	Yes	Yes	NO				Yes	Pain at the site of Injection, Vertigo (dizziness), Drowsiness	DIZZINESS FROM DAY ONE AND PAIN ON THE INJECTION SITE ON NEXT DAY	No	N/A	AUTOMATICALLY	No	FOR 4 TO 5 DAYS. BUT STILL FEEL WEAKNESS
2021-03-03 17:18:59	I Agree	Asik Arefin	29	Male	Graduate	Urban	Sirum Institute of India	India	2021-02-17	PG	First Dose	Injection	No	No			Could not identify	No	No	Napa	No	Yes	No		No	No	No	Yes	Pain at the site of Injection, Burning sensation	Right after taking vaccine.	No			Yes	3/4 days
2021-03-03 17:39:02	I Agree	Mohammad Al-Amin	26	Male	Post graduate/Doctoral	Urban	Covishield	India	2021-02-10	Dhaka Medical College Hospital	First Dose	Injection	No	No			No	No	No	Yes, Paracetamol 750 mg	Yes (Aspirin)	No	No					Yes	Pain at the site of Injection, Swelling, Fever, Vertigo (dizziness), Drowsiness, Decreased appetite	After 7-8 hours of vaccination	No		I took paracetamol 750mg twice	Yes	3 days
2021-03-03 18:44:24	I Agree	ss	17	Female	Secondary	Rural	Astrozeneca	India	2021-03-09	s	First Dose	Injection	s	No	s	s	Yes	s	s	s	s	No	Yes					No
2021-03-03 19:40:35	I Agree	Nurur Rahman Patwary	34	Male	Post graduate/Doctoral	Urban	Oxford	India	2021-02-13	Dhaka	First Dose	Injection		No			No	No		Fexofenadine tablet		Yes	Yes	No				Yes	Other:	After 24 hour	No	Take medicine		Yes	5 days
2021-03-03 20:44:08	I Agree	Dr Abdul Alim Al-Bari	49	Male	Post graduate/Doctoral	Urban	Oxford AstraZeneca	UK	2021-02-15	Rajshahi	First Dose	Injection	No	No			No	No	No	No	No	No	No	No	No	No	No	No			No			No
2021-03-03 21:05:14	I Agree	Mst. Shirajum Munira	43	Female	Undergrade	Urban	Oxford and Astrazeneca	Uk	2021-02-27	Razarbag Police hospital	First Dose	Injection		No			Could not identify	No	No	No	No	Yes	No		No			Yes	Pain at the site of Injection, Vertigo (dizziness)	About 10 minutes later	No		Autometically	No	1 days
2021-03-03 21:50:43	I Agree	Swapan Das	55	Male	Post graduate/Doctoral	Foreign	moderna	U.S.A	2020-12-28	Clifton Tree Perkins Hospital Center, Maryland,U.S.A	First Dose	Injection	Information about side effects	No			No	no		ibuprofen 800 mg as needed every 6 hours	sulfa drugs	Yes	No		No			Yes	Fever	6 hours after having 2nd dose	No				2 days
2021-03-04 08:16:57	I Agree	Abu Shahed Ahmed	47	Male	Post graduate/Doctoral	Urban	Kovisheld	India	2021-03-01	Shahid Ashanullah Master General Hospital, Tongi	First Dose	Injection		Yes	1. Ramdisivir Injection 2. Ceftriaxone Injection 3. Moxifloxacin Infusion 4. Rivaroxban Tablet 5.		Yes	No	No	No	Slight allergy	No	No	No				Yes	Pain at the site of Injection		Yes			No	2 days
2021-03-04 09:20:34	I Agree	Emran Ahmad	34	Male	Post graduate/Doctoral	Foreign	Pfizer	USA	2021-03-01	Walgreens Pharmacies, East Meadow, NY	Second Dose	Injection	VAR Form Filled out	No			No	Bladder cancer(2018), Heart Valve(2018) replacement	Metoprolol XL 25mg, Lisinopril 5mg, Rosuvastin 40mg,Zetia, Synthroid, Aspirin 81mg	In addition to above daily medication Acetaminophen 500mg one dose 8 hours after Vaccination			No					Yes	Pain at the site of Injection	20 hours after vaccinator	No		Ice pack for 5 minutes only once after 24 hours	Yes	one day
2021-03-04 09:29:22	I Agree	Sujit Kumar Kundu	30	Male	Post graduate/Doctoral	Urban	Serum (COVISHIELD)	India	2021-02-15	Uttara Kuiwait BD Friendship Hospital	First Dose	Injection	No	No			No	Hypertension, Asthma	Antihypertensive, AntiAsthmatic, Antihistamine, Diltiagem 90mg SR Tab for long time	Antihypertensive, AntiAsthmatic, Antihistamine, Diltiagem 90mg SR Tab for long time	Dust	Yes	No		No			Yes	Pain at the site of Injection
2021-03-04 09:35:14	I Agree	Jani Chandra Saha	50	Male	Post graduate/Doctoral	Urban	Covishild	India	2021-09-02	Dhaka Medical Collage	First Dose	Injection		No			No	no		Paracetamol 665 twice daily	no							Yes	Fever
2021-03-04 10:13:05	I Agree	Md. Limon Hossain	47	Male	Post graduate/Doctoral	Rural	Serum Institute	India	2021-02-13	Dhaka Medical College	First Dose	Injection		Yes	Ivermectin, Favipiravir, Vitamin D3, Domperidone, Zinc+B, Moxifloxacin, Monelukast and Doxophylline	No	No	Fatty Liver	No	Fenofibrate, Esomeprazole, Astaxanthine, Bisoprolol	Not tested	No	No	N/A	No	No	No	Yes	Pain at the site of Injection, Vertigo (dizziness), Drowsiness	After the day of Vaccination	Yes	Exercise-Walking and taking Fruits		Yes	Still now
2021-03-04 10:16:43	I Agree	Md. Anowar Hossain Miah	31	Male	Post graduate/Doctoral	Urban	Oxford University, Astrazeneca	Serum Institute, India	2021-02-22	Ahsanullah Master General Hospital, Tongi	First Dose	Injection	No	Yes	Remdesivir, Ceftriaxone, Enoxaparin Sodium	No	No	No	No	No	No	No	No					Yes	Pain at the site of Injection, Swelling, Fever	About after 8-9 hours	No			No	About 24 hours
2021-03-04 14:50:56	I Agree	Rahman	62	Male	Graduate	Urban	Serum Institute	India	2021-02-13	kuwait medical centre	First Dose	Injection	given contact no. for any discomfort	No	n/a	n/a	No	no	n/a	paracetamol tabs 500mg	none	No	No	no				yes	Pain at the site of Injection		No			No	1 day
2021-03-06 11:06:48	I Agree	Md. Rowshon Alam	40	Male	Post graduate/Doctoral	Urban	Serum Institute of India	India	2021-03-04	Shishu Matri Shastho Institute, Matuail (IMCH), Dhaka	First Dose	Injection	Minor side effects like fever, headache, bodyache	No			Could not identify	No	No	Yes, Paracetamol tablet	No	Yes	No					Yes	Pain at the site of Injection, Fever	After 3 hours	No		Taking Paracetamol tablet	Yes	48 hours
2021-03-06 16:01:03	I Agree	L. M. MD. TASLIMUL ISLAM	31	Male	Post graduate/Doctoral	Urban	Serum Institute	INDIA	2021-02-13	Mohammadpur Fertility Services & Training Centre, 100 Bedded Mother & Child Health Hospital	First Dose	Injection		No			No	NO	NO	NO	NO	Yes	No					Yes	Pain at the site of Injection	2nd Day of vaccination	No		Naturally	No	over night (6 hrs.)
2021-03-06 22:17:41	I Agree	Md Idris	49	Male	Secondary	Urban	Serum Institute	India	2021-02-20	Hathazari Upazila Health Complex	First Dose	Injection	don't rub on site of application	No			Could not identify	Yes. HTN, Angina, DM2, GIED	Yes. Nitric SR, Gluvan 500/50, Replet 75, Telma 40, Bisopro 2.5, Maxpro 20, Consucom MR	Took Ace xr	No	Yes	No					Yes	Pain at the site of Injection, Irritation at the site of Injection, Swelling, Fever, Pain at the joint of fingers	About after 6-7 hours	No	Just took, Ace XR 3 times a days. Sometimes took GABA P 50,		Yes	about 4 days
2021-03-07 15:39:51	I Agree	Nazmun Nahar	60	Female	Post graduate/Doctoral	Urban	Serum Institute	India	2021-02-14	National institute of ENT in Dhaka	First Dose	Injection	no	No	N/A	N/A	Could not identify	High Blood pressure, diabetes	N/A	N/A	No	No	No	no	No	No	No	No
2021-03-08 11:55:01	I Agree	Md Morshed Alam	48	Male	Post graduate/Doctoral	Urban	Serum India/Astra Zenica	India	2021-02-27	National Institute of Neuroscience & Hospital	First Dose	Injection	Latest Physical condition	No	n/a	n/a	No	no	no	yes, Paracetamol	cold/dust allergy	No	No	n/a	No	No	No	Yes	Fever, Other:	After 6 housr	No	Taking Paracetamol 3 doses (8 hourly)	n/a	Yes	24 hours
2021-03-08 15:47:54	I Agree	Pharmacist Md. Mojibur Rahman	56	Male	Post graduate/Doctoral	Urban	Oxfor Astra Zeneca	India	2021-03-07	National Institue of Diseases of the Chest and Hospital	First Dose	Injection	No	Yes	Cefixime 400 Cap, Ivermectine tab, Revearoxamine tab, Vitamin C tab, Zinc tab, Cancium+Vit-D tab, cough syp	No	No	No	No	Anti hypertensive tablet	No	No	No					No
2021-03-09 07:55:39	I Agree	Md. Jashim uddin patwary.	34	Male	Post graduate/Doctoral	Rural	Md. Jashim uddin patwary.	Bangladesh	2021-03-08	Matlab south	First Dose	Injection	No	No			Could not identify	No	No	No	yes	No	No		No	No	No	Yes	Pain at the site of Injection, Fever	After 25 hours I feel pain & fever.	No	I have taken a napa tablet.		Yes	2 or 3 hours
2021-03-11 12:43:07	I Agree	Rehana Begum	46	Female	Post graduate/Doctoral	Urban	Only mentioned vaccine name, Covishield	Not mentioned in card	2021-03-06	National Institute of ear nose & throat	First Dose	Injection	To wait 10 minutes at the centre	No	NA	NA	Could not identify	High blood pressure	Tab camlosart 5/20	Tab camlosart 5/20	yes, against dust, pollen	Yes	No	NA	No			Yes	Pain at the site of Injection	On the date of vaccination	No		Naturally	No	2 days
2021-03-22 14:29:52	I Agree	Mohammad Golbar Hossain	49	Male	Graduate	Foreign	AstraZeneca	England	2021-03-16	Um Alqura University vaccination center	First Dose	Injection	Yes	No			No	Diabetic		Paracetamol		No	No		No			Yes	Pain at the site of Injection, Swelling	Few minutes later	No
2021-03-23 23:28:51	I Agree	Md. Mustafizur Rahman	38	Male	Post graduate/Doctoral	Rural	Serum Institute of India	India	2021-02-28	Abu Naser Specialized Hospital, Khulna	First Dose	Injection	No	No			No	No	No	No	No	Yes	No					Yes	Irritation at the site of Injection	Beginning	No		naturally without medicine	No	4 days
2021-04-09 20:32:42	I Agree	Sabiha Rahman Mim	27	Female	Post graduate/Doctoral	Urban	serum institute (AZ)	India	2021-03-03	Kurmitola hospital	First Dose	Injection		No			Yes	No							No	No	No	Yes	Pain at the site of Injection, Fever, Vertigo (dizziness)	Just after vaccination	Yes	I am very weak now		No	After taking vaccine
2021-04-10 16:54:09	I Agree	Pradip Debnath	32	Male	Graduate	Urban	Astrazeneca	India	2021-02-18	Comilla Medical College	First Dose	Injection		No			No	No			No	No	No					Yes	Pain at the site of Injection		No			No	2 days
2021-04-11 10:53:26	I Agree	Prof Dr M Sayedur Rahman	64	Male	Post graduate/Doctoral	Urban	Covidsheld, Serum Institute	India	2021-04-09	Rajshahi Medical College Hospital	Second Dose	Injection	No	No			No	Diabetic, blood pressure		No	Dust Allergy	No	Yes	No				No
2021-04-11 19:07:55	I Agree	Md.mohiuddin alamgir	33	Male	Post graduate/Doctoral	Rural	Covi-shield,serum	Institute india	2021-04-10	Upzila hospital,kachua	Second Dose	Injection		No	No	No	Could not identify	No	No	No	No	No	No	No	No	No	No	yes	Pain at the site of Injection	After 4 hours	No			No	10 hours
2021-04-12 10:33:50	I Agree	Utpal Kumar Karmakar	35	Male	Post graduate/Doctoral	Urban	Oxford-AstraZeneca	India	2021-08-03	Shaheed Abu Naser Specialist Hospital, Khulna	First Dose	Injection	Next dose after two months	No			No	No diseases	Homeopathic Medicine (Arsenic album 30)			No	No	No				Yes	Pain at the site of Injection	Six hours after vaccination	No		Naturally	No	03 days
2021-04-13 13:51:52	I Agree	Md. Babul patwary	39	Male	Graduate	Urban	Oxford vaccine	India	2021-04-12	BSMMU	Second Dose	Injection	Don’t be uses of soap	No	N/A	n/a	No	Yes	No	No	No	No	No	n/a	No	No	No	No			No
2021-04-13 15:24:01	I Agree	Md al Emran	35	Male	Graduate	Urban	Seram	India	2021-02-27	Govt employee Hospital Fulbaria Dhaka	First Dose	Injection		No			No	No	No	No	No	No	No					No			No			No
2021-04-14 00:57:24	I Agree	Shofikur rahman	20	Male	Graduate	Rural	Oxford- Astro zenica	India	2021-04-13	Chittagong medical College Hospital	Second Dose	Injection		No			Yes	No				No	No					No
2021-04-14 11:21:15	I Agree	MD Ariful Islam	40	Male	Graduate	Urban	Serum india pvt ltd	India	2021-04-13	Bandartila Maternity clinic, CEPZ	Second Dose	Injection	n/a	Yes	Moxacilin +clavonoiac acid Montelukust Paracetamol Levosulbutamol Esomiprazole Azithromycin Ceftrizone	n/a		n/a	n/a	n/a	n/a	No	Yes	n/a	No	No	No	Yes	Pain at the site of Injection	After taking Vaccine 1st dose	Yes	n/a	n/a	No	60days
2021-04-15 16:39:22	I Agree	Md Altaf Hossain	33	Male	Higher Secondary	Rural	Fizzer ( may be)	India	2021-04-15	Sreebordi Thana Health Complex	Second Dose	Injection		Yes	2nd dose	No	No	No	No	No	No	No	No	Sometim I feel pain	No	No	No	Yes	Pain at the site of Injection		No			No
2021-04-15 23:40:28	I Agree	মো ইউনুছ মিয়া	38	Male	Post graduate/Doctoral	Urban	Astrazeneka-SII	ভারত	2021-04-13	সদর হসপিটাল, কুমিল্লা।	Second Dose	Injection	না	No	না	না	No	no	No	No		No	No	No	No	No	No	No						No
2021-04-16 05:44:27	I Agree	Muh. Rubbayet-E-Tanvir Hossain	47	Male	Graduate	Urban	The oxford astrazeneca covid 19 by serum institute	India	2021-04-13	MMC	Second Dose	Injection	No	No			No	No	No	No	No	No	No		No		No	No
2021-04-16 09:36:50	I Agree	Aloka Rani Das	55	Female	Graduate	Rural	Seram Institute, India	India	2021-04-15	Sk. Abu Naser specialised hospital, Khulna	Second Dose	Injection		No			No	No				No	No		No	No	No	Yes	Pain at the site of Injection		Yes			No
2021-04-17 11:27:32	I Agree	Md.Mokbul Hossain	31	Male	Graduate	Urban	Covisheld	England	2021-04-15	Central police hospital Rajarbag Dhaka.	Second Dose	Injection	No	No	No	No	No	No	No	No	No	No	No	No				No
2021-04-17 19:24:13	I Agree	MD RABIUL ISLAM	45	Male	Graduate	Urban	Serum institute	India	2021-04-13	Khulna 250 bed	Second Dose	Injection		No	No	No	Could not identify	Diabeties	Yes	Yes	No	No	No	No problem				Yes	Pain at the site of Injection, Itching		No			Yes	Two hrs
2021-04-17 19:24:42	I Agree	MD RABIUL ISLAM	34	Male	Graduate	Urban	Serum institute	India	2021-04-13	Khulna 250 bed	Second Dose	Injection		No	No	No	Could not identify	Diabeties	Yes	Yes	No	No	No	No problem				Yes	Pain at the site of Injection, Itching		No			Yes	Two hrs
2021-04-19 16:10:53	I Agree	Rifatul Islam	41	Male	Graduate	Urban	Serum institute (Licensed from oxford-astrazeneca)	India (Serum institute)	2021-04-19	Narayanganj 300 Bed Hospita	Second Dose	Injection	No	No			No	No	No	No	No	Yes	No	No				Yes	Pain at the site of Injection	After 2 hours of vaccination	No			No	1-2 days
2021-04-20 15:07:56	I Agree	Md. Mamnur Rashid	32	Male	Graduate	Urban	Siram Institute	India	2021-02-11	Bagmara, health complex	Second Dose	Injection		No			Yes	No	No	Yes	Less temparature	No	No		No		No	Yes	Pain at the site of Injection, Irritation at the site of Injection	Some irretable problem	No	Take antibiotic & monticulas tab		Yes	At that time
2021-04-20 19:57:45	I Agree	Nurul Huda Md Masum	46	Male	Post graduate/Doctoral	Urban	Serum Institute	India	2021-04-19	Mugda 500 Bed Hospital	First Dose	Injection	No	No			Yes	High Blood Pressure	Olmesartan, Rosuvastatin, Indomethacin and Aspirin	Aspirin and Olmesartan		No	No					Yes	Pain at the site of Injection	At night on the vaccination date	No		Aspirin	Yes	3-5 days
2021-04-20 20:43:41	I Agree	Md.Elias	49	Male	Graduate	Urban	Covisheild, Aztrazaneca	India	2021-04-19	Savar Upazilla Health Complex	Second Dose	Injection	No	No			Yes	Fever	Paracetamol, Azithromycin 500 mg	Paracetamol	No	Yes	No					Yes	Pain at the site of Injection, Fever, Drowsiness	After vaccination	Yes	By Taking medicines		Yes	1/2 days
2021-04-20 21:00:32	I Agree	Muhammad Ashraful Alam Khan	51	Male	Post graduate/Doctoral	Urban	Oxford-AstraZeneca	UK	2021-04-19	Muhammadpur Maternity Hospital	Second Dose	Injection	N/a	No	N/A	N/A	No	Back pain (left side of the body and lower portion)	N/A	N/A	Yes (blood)	No	No	Some times I feeled my heart breath is faster, after vaccined.				yes			No		I feeled two types of changes: 1. My back pain is vanished & 2.some time My heart breath is faster than normal.	No	After taken 1st dose
2021-04-21 10:59:16	I Agree	Abu sha mondol	40	Male	Graduate	Urban	Covishield	England	2021-04-18	Central police Hospital, Rajarbag, Dhaka.	Second Dose	Injection	No	No		No	No	No	No	No	No	No	No	No				No			No	No	No	No	No
2021-04-21 11:47:34	I Agree	MD. Dulal mia	30	Male	Higher Secondary	Urban	Covishield-4120z026. Serum Ins Of India	India	2021-04-18	Upazila Health Complex, jhenigati, Sherpur.	First Dose	Injection	Nil	No	No need	No need	No	No	No	No	No	No	No	No				Yes	Pain at the site of Injection	No Need	No	No Need	No Need	No	No Need
2021-04-21 12:10:48	I Agree	Md. Sharifuzzaman Khan	36	Male	Post graduate/Doctoral	Urban	Covishield (Astra Zeneca)	England	2021-04-20	Upazilla Health Complex, Sreepur	Second Dose	Injection	No..	No	No	No	Could not identify	No	No	No	No	No	No	No	No	No	No	Yes	Pain at the site of Injection, Irritation at the site of Injection, Drowsiness, Pain at the joint of fingers	2 hours after taking 2nd dose	Yes	Pain is there, but now the pain is healing at a slower rate.		No	The problem is still continuing
2021-04-21 23:07:15	I Agree	Md. Mansur Rahman Bhuiyan	42	Male	Post graduate/Doctoral	Urban	Serum Institute	India	2021-04-18	Dhamrai Health Complex	Second Dose	Injection	No	No			No	No	No	No	Food allergy	No	No		No	No	No	Yes	Pain at the site of Injection, Drowsiness	After vaccination	No		Automatically	No	1day
2021-04-22 17:33:07	I Agree	A.S.M. Akhtar-Uz-Zaman	60	Male	Post graduate/Doctoral	Urban	Astrogeneca	India	2021-04-20	Shahid Taj Uddin Ahmed Medical College, Gazipur	First Dose	Injection		No			No	No	No	No	No	No	No		No		No	No
2021-04-22 18:12:34	I Agree	Md. Mijanur Rahman Badal	49	Male	Post graduate/Doctoral	Urban	COVISHIL, OXFORD, INDIA	India	2021-04-20	Government Employee Hospital, Dhaka	Second Dose	Injection	Temperature increase internally under the skin like dehydrate the body	No			Could not identify	No		No	No	No	No					yes	Other:	Like dehydrate the total body. Increase the temperature inside the skin not up the skin. I solve this by water shaking therapy.	No		just normal water sponch	No	just 12 hour
2021-04-22 21:06:35	I Agree	Md.Alamgir Hossain	31	Male	Graduate	Urban	Serum	India	2021-04-22	Jhinaigati upazila health complex	First Dose	Injection	Very Simple system	No	Just formalities	No need	Could not identify	No	No	Essential for create antibody	No	No	No	Ni problems	No	No	No	Yes	Pain at the site of Injection	No problem	No	Just simple		No	No problem
2021-04-23 15:47:58	I Agree	Md. Abdul Alim	34	Male	Post graduate/Doctoral	Rural	Serum Institute of India	India	2021-04-20	Shaheed Sheikh Abu Naser Specialized Hospital, khulna	Second Dose	Injection		No			No	Asthma	Montelukast 10 mg, Ticamet 125 inhaler.	yes, paracetamol.	yes. Food allergy like coconut, beaf, shrimp.	No	No		No		No	Yes	Pain at the site of Injection, Fever, Vertigo (dizziness)	After one day.	No	Taking paracetamol		Yes	3/4 days.
2021-04-24 14:09:27	I Agree	Professor Dr. Muhammad Shahjalal	54	Male	Post graduate/Doctoral	Rural	Oxford Astrajeneca	India	2021-04-20	Shahid Sheikh Abu Naser Hospital Khulna	Second Dose	Injection		No			No	No	No	No	No	No	No					Yes	Pain at the site of Injection
2021-04-24 23:54:02	I Agree	Md Amirul Islam	35	Male	Post graduate/Doctoral	Rural	AstraZeneca	UK	2021-04-15	Khulna	Second Dose	Injection		No			Could not identify	No	No	No	No	Yes	No		No			Yes	Pain at the site of Injection, Irritation at the site of Injection, Fever	One hour after the vaccination	No			Yes	3 days
2021-04-25 16:58:48	I Agree	Dr. Mst Hajera Khatun	43	Female	Post graduate/Doctoral	Urban	Serum Institute	India	2021-04-25	Rajshahi Medical College	Second Dose	Injection	No	No			No	No	No	No	No	No	No		No		No	Yes	Fever	After 48 hrs	No	Nothing, autmatically removed		No	24 hrs
2021-04-25 19:58:33	I Agree	মোহাম্মদ জাকির হোসেন	50	Male	Post graduate/Doctoral	Rural	কোভিশেল্ড ,	ভারতীয়	2021-04-24	হাজীগঞ্জ উপজেলা স্বাস্থ্য কমপ্লেক্স	Second Dose	Injection		No	কোভিশেল্ড	না		ডায়াবেটিস	কম্পিড এক্সর ৬0, লিনাডি +৫০০,রিভোটিল 0.5, এলাট্রল	নাপা	ষ			না		No	No	Yes	Pain at the site of Injection	না	No
2021-04-27 21:08:37	I Agree	Md Moniruzzaman	54	Male	Graduate	Urban	Seram Institute	India	2021-04-27	Sahid sowroardi medical College and hospital.	Second Dose	Injection		No	No		No	No	No	No		No	No					No
2021-04-28 10:17:20	I Agree	মামুন অর রশিদ	24	Male	Post graduate/Doctoral	Rural	অক্সফোর্ড-আ্রসট্রেজেনিকা	ইংল্যান্ড	2021-04-19	খুলনা মেডিকেল কলেজ হাসপাতাল	First Dose	Injection	না	No			No	না	না	না	না	Yes	No		No		No	Yes	Pain at the site of Injection	একদিন পর	No			No	মাত্র একদিন
2021-04-28 12:02:42	I Agree	Mohd. Obidur Rahman	26	Male	Post graduate/Doctoral	Urban	COVISHIELD	Serum institute	2021-04-25	Mohammadpur	Second Dose	Injection		No				mild Asthma	montelucast, Doxyphylline	montelucast, Doxyphylline	na	No	No		No		No	No			No			No
2021-04-29 13:38:30	I Agree	A.T.M Rezaul Karim	63	Male	Graduate	Urban	Covacs	India	2021-04-25	Pilkhana BGB Hospital, Dhaka	First Dose	Injection		No			No	Hi blood pressure	Tab Betaloc, Tab Losardil	Tab Paracetamol		No	No					Yes	Pain at the site of Injection, Fever	After 12 hour	No
2021-04-30 01:06:57	I Agree	Md. Mustafizur Rahman	37	Male	Post graduate/Doctoral	Urban	Oxford-Astrazeneca	India	2021-04-27	Shaheed Sheikh Abu Naser Specialised Hospital, Khulnaal	Second Dose	Injection	No	No			No	No	No	No	No	Yes	No					No
2021-04-30 04:06:14	I Agree	Mohd.Abul KalamAzad	43	Male	Post graduate/Doctoral	Urban	Covid shield	India	2021-04-28	Dhaka	Second Dose	Injection	No	No			No	No				No	No					No
2021-05-02 23:47:54	I Agree	Amiya Bhushan Saha	45	Male	Post graduate/Doctoral	Urban	Astrozeneca	India	2021-02-26	Gazipur	First Dose	Injection	No	No			No	Typhoid	Azithromycin,PPI,Paracetamol	PPI	no	Yes	No					No
2021-05-03 00:14:34	I Agree	Md. Bahar Ullah Bhuiyan	42	Male	Post graduate/Doctoral	Urban	India's Serum Institute	India	2021-03-04	Matri Sadan Ahsania Mission, Mirpur-1	First Dose	Injection	to take rest and stay in the vaccination centre for 30 mins so that the health workers could observe for any immediate side effects	No			Could not identify	Type-2 Diabetes Mellitus	Insulin	Insulin	No	Yes	No					No
2021-05-03 00:36:57	I Agree	Taslima Begum	30	Female	Graduate	Urban	Serum's Institute	India	2021-03-04	Matri Sadan Ahsania Mission	First Dose	Injection	to stay there for 30 mins to keep under observation	No			Yes	No	No	No	No	Yes	No		No		No	Yes	Itching	almost about 1 hour	No		it subsided automatically	No	around 1 day
2021-05-03 12:31:41	I Agree	Lakshmi Saha	54	Female	Graduate	Urban	Astrozeneca	India	2021-02-26	Gazipur	First Dose	Injection	No	No			No	No	Paracetamol, Antihistamine, PPI	Paracetamol, PPI,Antihistamine	Yes,eggplant, shrimp	Yes	No		No		No	Yes	Pain at the site of Injection, Irritation at the site of Injection, Burning sensation, Anaphylaxis	The day of vaccination	No	It went of it own		No	1 week
2021-05-03 12:43:42	I Agree	Hosneara Yasmin	56	Female	Post graduate/Doctoral	Rural	AstroZeneca	India	2021-03-03	Jhalakathi Govt Hospital	First Dose	Injection	N/A	No			Could not identify	No			No	Yes	No	No				Yes	Pain at the site of Injection, Fever, Other:	After vaccination	No	By medicine (Ace plus)		Yes	24 hours after vaccination
2021-05-03 13:23:59	I Agree	Most. Ashrafunnessa	45	Female	Post graduate/Doctoral	Urban	Serum institute	India	2021-02-17	Jessore Sadar Hospital	First Dose	Injection		No			No	Hypertension	Yes, atenolol, amlodipine	Paracetamol	No	Yes	No		No			Maybe
2021-05-03 13:29:27	I Agree	Kamrun Nahar	59	Female	Undergrade	Urban	Serum Institute	India	2021-03-03	CMH, Chittagong	First Dose	Injection		No			No	No							No			No
2021-05-03 17:03:26	I Agree	Mohammed Rezaul Karim	46	Male	Graduate	Rural	Serum India	India	2021-02-18	Mirpur 14	First Dose	Injection	Yes	No			No	Hypertension, diabetes	Aspirin, amlodipine, losartan, metformin	Aspirin, amlodipine, losartan, metformin	Eggplant	Yes	No					Yes	Pain at the site of Injection	After some time	No		Gradually without any intervention	No	1-2 days
2021-05-03 17:38:06	I Agree	Ratan Kumar Saha	37	Male	Post graduate/Doctoral	Urban	Covishield	Astana	2021-04-08	Dhaka Dental College	Second Dose	Injection	N/a	Yes			No	No	No	Yes, carvizole	No	No	No					Yes	Pain at the site of Injection
2021-05-03 21:30:08	I Agree	B M Fahim Faisal	24	Male	Undergrade	Rural	Serum Institute	India	2021-04-29	Bogra	Second Dose	Injection	No	No	Nothing	Not applicable	No	No	No	No	No	No	No	Not applicable	No	No	No	No		Not started	No	Not applicable	Not applicable	No	Not applicable
2021-05-03 23:04:05	I Agree	Zamilur Reza	21	Male	Undergrade	Rural	Astrogenica	India	2021-03-31	Comilla	First Dose	Injection	no	No			Could not identify	fever	no	Paracetamol	no	Yes	No		No	No	No	Yes	Burning sensation, Body pain	about an hour after taking the dose	No			Yes	one day
2021-05-04 01:28:28	I Agree	Kazi Mahbubur Rahman	44	Male	Graduate	Urban	Serum Institute	India	2021-04-08	Narayanganj	First Dose	Injection		Yes	Antibiotics, Anti-viral (ivera), vitamins, anti-allergic and vitamins, zinc, bronchodilator (monas)	No	No	No	No	No	Not sure	No	No					No
2021-05-04 10:12:08	I Agree	Mithun Saha	27	Male	Post graduate/Doctoral	Urban	Oxford, Astrazeneca	England	2021-03-01	250 Bed sadar hospital, Feni	First Dose	Injection	No	No	N/a	N/a	No	No	No	No	No	No	No	N/a	No	No	No	Yes	Pain at the site of Injection, Fever, Body pain	After 8 hours of Vaccination	No	N/a	After taking Paracetamol medicine	Yes	1 day
2021-05-04 12:42:34	I Agree	Moni Saha	40	Female	Graduate	Urban	Astrozeneca	India	2021-02-13	Tangail Medical College Hospital	First Dose	Injection		No			No	No	No	No	No				No			yes	Pain at the site of Injection					No
2021-05-04 12:45:44	I Agree	Ashim Kumar Saha	55	Male	Post graduate/Doctoral	Urban	Astrozeneca	India	2021-02-13	Tangail medical college hospital	First Dose	Injection		No			No	No	No	No	No	No	No					No
2021-05-04 12:49:08	I Agree	Anil Kumar Saha	65	Male	Undergrade	Rural	Astrozeneca	India	2021-02-11	Jamurki hospital	First Dose	Injection		No			No	No			No	No	No					No
2021-05-04 12:51:47	I Agree	Purobi Saha	69	Female	Secondary	Urban	Astrozeneca	India	2021-02-11	Jamurki Hospital	First Dose	Injection		No			No	No				No	No		No			No
2021-05-04 14:11:55	I Agree	Zohra Begum	35	Female	Graduate	Urban	Serum Institute, India	India	2021-04-11	Mugda Medical College Hospital	First Dose	Injection		No			No	High pressure	Abecab				No		No		No	No						No
2021-05-04 16:19:07	I Agree	Samir Saha	39	Male	Graduate	Urban	Oxfard Astegeneca	India	2021-04-11	SZMCH, Bogura	First Dose	Injection		No			No	No	No									No			No
2021-05-04 19:37:08	I Agree	Sukesh Das	65	Male	Primary	Urban	Serum Institute of India	India	2021-02-17	Sheikh Hasina Burn and plastic surgery Institute	First Dose	Injection		No			No	No	No	No	No		No					No
2021-05-04 19:39:09	I Agree	Jesmin Aktar	44	Female	Secondary	Urban	Serum institute	India	2021-05-02	Savar Upazilla Health Complex	First Dose	Injection	No	No			No	Piles	Yes, Anustat ointment	Yes, Anustat ointment	Yes, soap, prawn, hilsha fish etc	Yes	No		No		No	No
2021-05-04 19:42:08	I Agree	Bashonti Rani Das	52	Female	Primary	Urban	Serum Institute of India	India	2021-02-16	Sheikh Hasina Burn and plastic surgery Institute	First Dose	Injection		No				Coughing	Cough syrup	No	Yes	Yes	No		No	No	No	Yes	Burning sensation	After administration of second dose.	Yes	No measurement is taken.		No
2021-05-04 19:43:28	I Agree	Md. Moslem Uddin	38	Male	Higher Secondary	Urban	Serum institute	India	2021-05-02	Savar Upazilla Health Complex	First Dose	Injection	No	No			No	No	No	No	Yes, dust	Yes	No		No			Yes	Pain at the site of Injection, Body pain	From some hours after getting the vaccine	Yes			No	Till now 2 days
2021-05-04 19:52:27	I Agree	Rubi khanam	46	Female	Graduate	Urban	Serum Institute	India	2021-03-18	Netrakona Sadar	First Dose	Injection		No			No	No	No	No	Food allergy,dust allergy	No	No		No	No	No	Yes	Pain at the site of Injection, Itching	Probably after 1 hour of vaccination	No		After few hours,the side effects are fully disappeared	No	Few hours like 4-5 hours
2021-05-04 19:54:47	I Agree	Kazi Md. Anowar Hossain	59	Male	Graduate	Urban	Serum Institute	India	2021-02-16	Chandpur	First Dose	Injection		No			No	Asthma, Chronic headache	Montelukast Sodium, Benzodiazepine, Mecobalamin, Doxophylline	Same as before	No	Yes	No					Yes	Irritation at the site of Injection, Swelling, Fever, Vertigo (dizziness)	Swelling,irritation was noticed after 10-12 hours and fever after 20-24 hours of vaccination	No		Consumption of paracetamol and bed rest for some hours	Yes	Swelling for some days and fever for 5-6 hours
2021-05-04 20:04:48	I Agree	Mst. Sultana Akter	31	Female	Graduate	Urban	Serum Institute	India	2021-02-17	Upazilla Health Complex, Aligonj,Chandpur	First Dose	Injection		No			Could not identify	Asthma	Montelukast			Yes	No		No	No	No	No			No			No
2021-05-04 20:17:30	I Agree	Tanvin Uchsash	27	Male	Graduate	Rural	Serum Institute	India	2021-03-08	Tangail sadar	First Dose	Injection	It may cause some side effects( vomiting nausea headache)	No			No	no	no	no	no	Yes	No		No		No	yes	Pain at the site of Injection, Fever, Body pain	Next day after vaccination	No		it was gone after some days	No	2 days
2021-05-04 22:30:26	I Agree	Rasheed mahmud	24	Male	Undergrade	Rural	Serum institute	India	2021-02-22	Sadar Hospital, Thakurgaon	First Dose	Injection		No			No	No	No	Yes	No	Yes	No		No			Yes	Pain at the site of Injection					No	24 hours
2021-05-04 22:37:03	I Agree	Mokhlesur rahman	34	Male	Graduate	Rural	Serum institute	India	2021-02-22	Sadar hospital,Thakurgaon	First Dose	Injection	No	No			No	No	No	No	No	Yes	No		No	No	No	Yes	Pain at the site of Injection	Within 1 hour of vaccination	No			No	24 hours
2021-05-05 11:44:26	I Agree	Mrs. Nargis begum	45	Female	Graduate	Rural	Serum Institute	India	2021-02-25	Mymensingh Medical College Hospital	First Dose	Injection		No			No	Diabetes, thyroid problem	Obid, Thyrox	Obid, Thyrox	No	No	No		No	No	No	Yes	Pain at the site of Injection	After about 6-8 hours of vaccination	No		Naturally	No	2 days
2021-05-05 16:31:58	I Agree	Not comfortable in sharing	67	Male	Primary	Urban	AstraZeneca	India	2021-04-17	Sheikh Hasina National Institute of Burn and Plastic Surgery	First Dose	Injection	N/A	No			No	No permanent disease, but stroke	yes, regular pressure tablets	No	No	Yes	No		No			No
2021-05-05 17:49:06	I Agree	Ankhi	47	Female	Graduate	Urban	Astrozeneca	India	2021-10-02	Rajshahi	First Dose	Injection		No			No	No	Yes, telfast 120	No	No	Yes	No		No			No
2021-05-05 17:53:02	I Agree	Swapan mistry	59	Male	Post graduate/Doctoral	Urban	Astrozance	India	2021-10-02	Noagaon	First Dose	Injection		No				No	No	No	No	No	No		No	No	No	No
2021-05-05 19:19:17	I Agree	Ratan Paul	35	Male	Secondary	Rural	Serum institute	India	2021-04-17	Sadar,Mymensingh	First Dose	Injection	No	No			No	No	No	No	No	No	No					Yes	Fever, Body pain	After 4-5 hours of vaccination	No	Rest		No	24 hours
2021-05-05 19:24:32	I Agree	Rupa Paul	40	Female	Secondary	Rural	Serum Institute	India	2021-04-17	Sadar,Mymensingh	First Dose	Injection	No	No		No	No	No	No	No	Food allergy	No	No		No		No	Yes	Nausea, Vertigo (dizziness), Body pain	After 4-5 hours of vaccination	No	Rest		No	48 hours
2021-05-05 22:49:35	I Agree	Anup Kumar saha	59	Male	Graduate	Rural	Astrozeneca	India	2021-02-10	BSMMU	First Dose	Injection		No			No	No	Ciprofloxacin	Same as before	No	Yes	No		No		No	Yes	Pain at the site of Injection, Nausea, Decreased appetite, Body pain	The same night after vaccination	No	By Anti ematics drug		Yes	2days
2021-05-05 22:54:26	I Agree	Dipa saha	56	Female	Graduate	Urban	Astrozeneca	India	2021-02-11	BSMMU	First Dose	Injection		No			No	HTn	Anti hypertensive drug	Same aa above	No	No	No		No	No	No	Yes	Pain at the site of Injection, Body pain	Night of the vaccination	No		By taking NSAID	Yes	2days
2021-05-05 23:00:02	I Agree	Tahsin	24	Male	Graduate	Urban	Covisheild	India	2021-12-03	BNS Haji Mohsin	First Dose	Injection		Yes	As per prescriptions	No	No	No	No	No	No	No	No	No	No	No	No	Yes	Drowsiness, Body pain	Just after vaccination	No	Resting		No	2/3 days
2021-05-05 23:02:08	I Agree	Arun saha	60	Male	Higher Secondary	Urban	Astrozeneca	India	2021-03-11	Mugda Medical	First Dose	Injection		No			No	No		No	No	No	No		No	No	No	Yes	Fever, Body pain	That night after vaccination	No		By taking paracetamol	Yes	2days
2021-05-05 23:06:49	I Agree	Champa saha	55	Female	Secondary	Urban	Astrizeneca	India	2021-03-12	Mugda medical College	First Dose	Injection		No			No	HTn	Anti hypertensive	Same aa above & montelucast	Yes	Yes	No		No	No	No	Yes	Fever, Body pain, Cough, sneezing, sore throat	The day after vaccination	No		By taking montelucast, paracetamol & tetracycline	Yes	5days
2021-05-05 23:16:58	I Agree	Mohammad ali khan	50	Male	Post graduate/Doctoral	Urban	Astrozeneca	india	2021-01-01	Dhaka	First Dose	Injection	No	No			No	No	No			Yes	No		No		No	No			No			No
2021-05-05 23:19:56	I Agree	Kazi Hazera Sultana	47	Female	Graduate	Urban	Astrozeneca	India	2021-04-10	Tangail	First Dose	Injection	No	No			No	No				Yes	No		No	No	No	No			No			No
2021-05-06 00:35:18	I Agree	Mohammed Jalal	32	Male	Graduate	Urban	AstraZeneca	India	2021-03-16	Mostafa Hakim Maternity Center	First Dose	Injection		No			No	No										Yes	Pain at the site of Injection
2021-05-06 00:38:26	I Agree	Mohammad Mohsin	54	Male	Graduate	Urban	AstraZeneca	India	2021-03-16	Mostafa Hakim Maternity Hospital	First Dose	Injection		No				No										Yes	Pain at the site of Injection, Irritation at the site of Injection
2021-05-06 12:23:31	I Agree	Satya Ranjan Biswas	48	Male	Graduate	Rural	Astrozenca	India	2021-02-17	Magura	First Dose	Injection	No	No			No	No	High Pressure medicines	High pressure medicines	No known allergy	Yes	No		No		No	Yes	Pain at the site of Injection, Fever, Body pain	After a while of the vaccination	No		Automatically subsided after 2 days	No	2 days
2021-05-06 13:10:28	I Agree	China rani saha	56	Female	Secondary	Rural	Astrozeneca	India	2021-02-24	Upazila health complex,Kaliakoir	First Dose	Injection	No	No			No	No				No	No		No			No
2021-05-06 13:25:51	I Agree	Balai chan saha	64	Male	Secondary	Rural	Astrozeneca	India	2021-02-24	Upazila health complex,Kaliakoir	First Dose	Injection	No	No			No	No			No	No	No		No	No	No	No
2021-05-06 14:18:12	I Agree	A.K.M Monjurul Alam Chowdhury	37	Male	Post graduate/Doctoral	Urban	Serum Institute	India	2021-02-03	Rajarbagh Police line hospital	First Dose	Injection	none	No			Yes	Heart disease ,Diabetes	Cardiac and Diabetes medicines	Cardiac and Diabetes medicine	None	Yes	No		No	No	No	No
2021-05-06 14:21:10	I Agree	Nilima rani saha	60	Female	Graduate	Urban	Nilima rani saha	Bangladesh	2021-04-18	Dhaka medicale hospital	First Dose	Injection		Yes	Zink 20,napa, Drise etc....	No	Yes	No	No	Yes	No	No	No		No	No	No	yes	Pain at the site of Injection	19Th april	No	Yesn	No	No
2021-05-06 17:31:48	I Agree	Rikta	32	Female	Secondary	Urban	Astrozeneca	India	2021-04-21	Dhaka Dental College	First Dose	Injection	Said to take rest	No			No	No	Yes (Montair)	No	No	Yes	No	No	No	No	No	Yes	Pain at the site of Injection, Irritation at the site of Injection, Fever, Body pain	After 5 hours of taking	No			No	3 days
2021-05-06 19:53:50	I Agree	Ayra khatun	38	Female	Graduate	Rural	Serum institute	India	2021-03-28	Koloroa upazila health complex	First Dose	Injection	Nothing	No	Nothing	Nothing	No	Nothing	Nothing	Napa extra ...	Yes...dipa..beat ,jinger,prawn	Yes	No	Nothing	No	No	No	No			No			No
2021-05-06 20:03:03	I Agree	Md fazlul haque sarkar	50	Male	Higher Secondary	Rural	Serum institute	India	2021-03-28	Koloroa upazila health complex	First Dose	Injection	Nothing	No			No	High bp	Nothing... paracetamol	Yes....nibita,lipired..	Nothing	No	No		No	No	No	Yes	Pain at the site of Injection, Nausea, Intussusception (folding of intestine), High pressure,neck pain, diabetes.	After 1 week of vaccination	Yes	Medicine ,test , doctor appointment		Yes	30 min
2021-05-06 20:06:55	I Agree	Kaniz Fatema	44	Female	Secondary	Urban	Serum Institute	India	2021-02-22	Sirajganj 250 Bed Bongamata Sheikh Fazilatunnesa Mujib General Hospital	First Dose	Injection	No.	No			Yes	ODS.	No.	No.	Yes. Against hot weather and some allergic foods.	No	No		No		No	No
2021-05-06 21:04:48	I Agree	Ansar	37	Male	Higher Secondary	Urban	Astrozeneca	India	2021-04-21	Dhaka Dental College	First Dose	Injection		No			No	Yes, Diabetes, CKD	Yes. Insulin	No	No	Yes	Yes	Fever	No	No	No	Yes	Fever	After 1 day	No		Automatically	No	3 days
2021-05-06 21:08:37	I Agree	Selina	50	Female	Secondary	Urban	Astrozeneca	India	2021-04-03	Dhaka	First Dose	Injection		No			No	No	No	No	No	Yes	No		No	No	No	Yes	Pain at the site of Injection, Irritation at the site of Injection, Burning sensation, Fever, Nausea, Body pain	After 5-6 hours of taking the dose	No		Automatically	No	2 days
2021-05-06 21:10:52	I Agree	Rana	41	Male	Post graduate/Doctoral	Urban	Astrozeneca	India	2021-03-20	Dhaka	First Dose	Injection		Yes	Vitamin D	No	No	Yes. High blood pressure	No	No	No	Yes	No		No	No	No	No
2021-05-06 21:15:12	I Agree	Sadi	21	Male	Graduate	Urban	Astrozeneca	India	2021-04-12	Dhaka	First Dose	Injection		No			No	No	No	No	No	Yes	No		No	No	No	Yes	Pain at the site of Injection, Fever, Body pain	After 4-5 hours	No	Automatically		No	2 days
2021-05-06 21:19:38	I Agree	Zannatul	53	Female	Graduate	Urban	Astrozeneca	India	2021-03-26	Dhaka Dental College	First Dose	Injection		No			No	No	No	No	No	Yes	No		No	No	No	Yes	Pain at the site of Injection, Fever, Nausea, Decreased appetite, Body pain	After 4-5 hours	No	Automatically		No	3 days
2021-05-06 21:28:22	I Agree	Bandana Rani Bonik	35	Female	Higher Secondary	Urban	Serum Institute	India	2021-04-18	Noakhali General Hospital	First Dose	Injection		No			Yes	Backbone Pain	Tab.Anaflex Max 500 Cap.D-rise 40000IU Tab.Amilin 10mg			Yes	No	Headache, Weakness	No			Yes	Vertigo (dizziness), Drowsiness, Body pain	After the day of second dosage	No		It became normal automatically	No	Two days
2021-05-06 22:12:04	I Agree	Nazmun Nahar	42	Female	Graduate	Urban	Serum institue	India	2021-02-25	Government Employee Hospital	First Dose	Injection	No	No			No	No	Osartil , Seclo	No	No	No	No	No	No	No	No	No
2021-05-06 22:24:53	I Agree	Monowara Begum	57	Female	Secondary	Urban	Serum Institute	India	2021-02-17	Upazila Health Complex, Chhagalnaiya	First Dose	Injection		No			Yes	Diabetes and High Blood Pressure	Insulin and Glittin M 500 (for diabetes) , Lanso D 30(for gastric), Bislol 0.5 (for high blood pressure)	Insulin and Glittin M 500 (for diabetes) , Lanso D 30(for gastric), Bislol 0.5 (for high blood pressure)	No	Yes	No		No			Yes	Pain at the site of Injection, Irritation at the site of Injection, Fever, Body pain	After one day of vaccination	No		Normally	No	1 week
2021-05-06 23:01:32	I Agree	Shakhawat Hossain	27	Male	Undergrade	Urban	Oxford Astrazeneka,Serum Institute	India	2021-03-10	Nabinagar Govt High School Center	First Dose	Injection		No				Diabetes Patient										Yes	Pain at the site of Injection		No
2021-05-06 23:19:54	I Agree	Bristy Saha	29	Female	Undergrade	Urban	Astrozeneca	India	2021-02-20	Dhaka	First Dose	Injection	No	No			No	Severe Burn	Antibiotics, pain killer	Painkiller	Shrimp, eggplant	Yes	No	Allergy,Vomiting, fever	No		No	Yes	Pain at the site of Injection, Itching, Fever, Nausea
2021-05-06 23:31:38	I Agree	Sudarshan Saha	70	Male	Higher Secondary	Urban	Astrozeneca	India	2021-02-20	Dhaka	First Dose	Injection	no	Yes	Antitussive, Antihistamine, Paracetamol	No		COVID-19	Antitussive, Antihistamine, Paracetamol, Antihypertensive	Antihypertensive	No	No	No	no				No
2021-05-06 23:55:55	I Agree	Tithi Saha	23	Female	Undergrade	Urban	Astrozeneca	India	2021-02-23	Union Health Complex	First Dose	Injection	no	Yes	Vitamin D,zinc	no		Covid-19	No	No	Yes	Yes	No		No		No	Yes	Pain at the site of Injection, Itching, Fever	The day of vaccination	No	Went of it own		No	2-3 days
2021-05-07 00:16:54	I Agree	Swapan Saha	58	Male	Graduate	Urban	Astrozeneca	India	2021-02-11	Union health complex	First Dose	Injection	no	No			No	No	Antihypertensive, sedatives	Antihypertensive, Sedatives	No	No	No					No
2021-05-07 12:14:38	I Agree	Saifun Nahar	25	Female	Undergrade	Urban	Serum Institute	India	2021-03-08	Mohammadpur fertility center	First Dose	Injection		No			No	High BP	Telmisartan	Telmisartan	Yes	No	No		No			Yes	Pain at the site of Injection, Fever, Body pain	About After 5 hours of vaccination	No		Naturally	No	About a night
2021-05-07 14:26:58	I Agree	Pervin Akter	50	Female	Higher Secondary	Urban	Serum Institute	India	2021-05-06	DMC	Second Dose	Injection	None	No			Could not identify	Yes, Cold	Yes, Fexo	Yes, Fexo	No	Yes	No		No		No	Yes	Pain at the site of Injection, Body pain	After 12 hours of vaccination	No		On its own	No	For 24 hours
2021-05-07 14:45:45	I Agree	Kalipod Majumdar	31	Male	Secondary	Urban	vaccine manufacturers name Astrozeneca Manufacturing country India Dose 10 mg Dosage form injection	India	2021-03-24	Mid ford hospital	First Dose	Injection		No			No	No				No	No		No	No	No	Yes	Fever	From the day of vaccination	No		By taking medicine	Yes	2 days
2021-05-07 14:49:14	I Agree	Rajib datta	28	Male	Undergrade	Urban	vaccine manufacturers name Astrozeneca Manufacturing country India Dose 10 mg Dosage form injection	India	2021-03-23	Upazila health complex, Barura	First Dose	Injection		No			No	No				No	No		No	No	No	Yes	Fever	At the day of vaccination	No		Taking medicine	Yes	2/3 days
2021-05-07 14:51:26	I Agree	Mallika Majumdar	46	Female	Secondary	Urban	vaccine manufacturers name Astrozeneca Manufacturing country India Dose 10 mg Dosage form injection	India	2021-03-22	Mid ford hospital	First Dose	Injection		No			No	No							No	No	No	Yes	Fever
2021-05-07 15:00:09	I Agree	Salina akther	48	Female	Secondary	Urban	Salina Akther	Bangladesh	2021-03-21	City corporation general hospital chittagong	First Dose	Injection	No	No			No	Diabetes, hypertention	Yes.. mefin & osartil			No	No	Severe cough with sputum	No	No	No	Yes	Pain at the site of Injection	After	No
2021-05-07 15:35:03	I Agree	Arpita Barua	33	Female	Graduate	Urban	Astrozeneca	India	2021-04-18	Patiya,upazila health complex	First Dose	Injection		No	No	No	No	No	No	Napa	No	No	No	No	No	No	No	Yes	Fever	After vaccination	No	By taking paracetamol		Yes	1 day
2021-05-07 15:58:35	I Agree	Sanjay Saha	54	Male	Post graduate/Doctoral	Urban	Astrozeneca	India	2021-02-28	Dhaka	First Dose	Injection	no	Yes	Antihistamine, zinc,vitaminD,paracetamol	no		Covid-19	No	no	no	No	No					No
2021-05-07 16:00:59	I Agree	Supria banik oishi	29	Female	Undergrade	Rural	Astrozeneca	India	2021-05-06	Sylhet, MAG osmani medical college	First Dose	Injection	Advice given by hospital authorities to take 30 mintutes rest after vaccination, whether the any kind of complications arised or not	No	None		No	No	No	No	No	No	No	No	No	No	No	Yes	Pain at the site of Injection, Swelling, Fever, Drowsiness	3-4 hours after vaccination	No		By itself	No	2 days
2021-05-07 16:01:23	I Agree	Bina Saha	55	Female	Graduate	Urban	Astrozeneca	India	2021-05-23	Union health complex	First Dose	Injection	no	No			No	no	no	no		Yes	No		No		No	No
2021-05-07 16:10:06	I Agree	Debdip Barua	31	Male	Post graduate/Doctoral	Urban	Seram Institute	India	2021-02-10	Upazilla medical complex ,Raiganj	First Dose	Injection	Not applicable	Yes	Antibiotic,ivermectin	No	Yes	No	No	No	No	No	No	Not applicable	No	No	No	Yes	Pain at the site of Injection, Body pain	After injection	No	Not applicable	In normal way	No	For 3 days
2021-05-07 16:18:20	I Agree	Suparna Barua	49	Female	Post graduate/Doctoral	Urban	Seram Institute	India	2021-02-28	Raiganj	First Dose	Injection	Not applicable	No	Not applicable	No	No	No	No	No	No	No	No	Not applicable	No	No	No	Yes	Pain at the site of Injection	After injection	No	Not applicable	Normally	No	For 2 days
2021-05-07 16:39:58	I Agree	Alpona Saha	50	Female	Secondary	Urban	Astrozeneca	India	2021-02-11	Union health complex	First Dose	Injection	no	No			No	no	no	no	no	No	No		No		No	Yes	Pain at the site of Injection	The day of vaccination	No	Of it own		No	1-2 days
2021-05-07 17:30:50	I Agree	Aroti Saha	44	Female	Secondary	Urban	Astrozeneca	India	2021-02-02	Gazipur	First Dose	Injection	no	No	no		No	No	Antihypertensive	antihypertensive	no	No	No		No		No	Yes	Pain at the site of Injection	The day of vaccination	No		of it own	No	1-2 days
2021-05-07 17:34:54	I Agree	Molina Saha	35	Female	Secondary	Urban	Astrozeneca	India	2021-04-25	Gazipur	First Dose	Injection		No			No	no	no	no	no	Yes	No		No		No	Yes	Itching	1-2	No		of it own	No
2021-05-07 17:42:24	I Agree	Chandan Saha	50	Male	Secondary	Urban	Astrozeneca	India	2021-04-25	Gazipur	First Dose	Injection		No			No	no	Antidiabetic	Antidiabetic	no	No	No					No
2021-05-07 17:47:27	I Agree	Rina Saha	49	Female	Secondary	Urban	Astrozeneca	India	2021-03-18	Gazipur	First Dose	Injection	no	No			No	no	no	no	Dust Allergy	Yes	No		No		No	Yes	Pain at the site of Injection, Swelling	45 days after vaccination	No		of it own	No	7 days
2021-05-07 17:51:11	I Agree	Monu saha	60	Female	Secondary	Rural	Astrozeneca	India	2021-02-18	Gazipur	First Dose	Injection	no	No			Yes	Antihistamine, Antitussive, paracetamol	Antidiabetic, pain killer	Antidiabetic, Pain killer	no	No	No		No		No	No
2021-05-07 18:50:57	I Agree	Manoz	67	Male	Post graduate/Doctoral	Urban	Conishield S.I	India	2/17/0021	Dhaka Medical College Hospital	First Dose	Injection	No	Yes	Vit c, azithromycin, cough syrup	No	No	Diabetes,	Mysulin, legend, empaglif, mycrofee	Same	No	No	No		No	No	No	Yes	Pain at the site of Injection, Burning sensation, Body pain	Immediately after administration	No			No	1 week
2021-05-07 19:35:24	I Agree	Mikhi	46	Female	Post graduate/Doctoral	Urban	Asteizeneca	India	2021-03-19	Dhaka	First Dose	Injection		No			No	No	No	No	No	Yes	No		No	No	No	Yes	Pain at the site of Injection, Irritation at the site of Injection, Swelling, Fever, Body pain	After 3 hours	No			No	After 3 days
2021-05-07 19:38:46	I Agree	Ruhul Amin	51	Male	Higher Secondary	Urban	Astrozeneca	India	2021-03-05	Dhaka	Second Dose	Injection		No				No	No	No	No	Yes	No		No	No	No	Yes	Pain at the site of Injection, Irritation at the site of Injection, Fever, Nausea, Body pain	After 5-6 hours	No	By taking napa		Yes	2 days
2021-05-07 19:41:47	I Agree	Afroza	33	Female	Secondary	Urban	Astrozeneca	India	2021-03-03	Dhaka	Second Dose	Injection		No			No	No	No	No	No	Yes	No		No	No	No	Yes	Pain at the site of Injection, Irritation at the site of Injection, Fever, Body pain	After 2-3 hours of Vaccinated	No			Yes	3 days
2021-05-07 19:43:32	I Agree	Nasir	34	Male	Secondary	Urban	Astrozeneca	India	2021-03-01	Dhaka	Second Dose	Injection		No			No	No	No	No	No	Yes	No		No	No	No	No
2021-05-07 19:45:01	I Agree	Shibli	40	Male	Higher Secondary	Urban	Astrozeneca	India	2021-03-20	Dhaka	First Dose	Injection		No				No							No	No	No	No
2021-05-07 21:17:37	I Agree	Sulata sarkar	59	Male	Undergrade	Rural	Serum Institute	India	2021-04-20	Gopalganj medical	Second Dose	Injection	No	No			No	Gastric, high blood pressure	PPI,hypertension	PPI,hypertension	No	Yes	No	No	No	No	No	Yes	Pain at the site of Injection, Irritation at the site of Injection, Swelling, Fever, Nausea, Decreased appetite, Body pain	After taking second dose	Yes	Doing nothing..just taking rest		No	Nearly 17 days, still continuing
2021-05-07 21:32:04	I Agree	Fatema Begum	34	Female	Higher Secondary	Urban	Serum Institute	India	2021-03-11	Faridganj Upazila Health Complex	First Dose	Injection	No	No			No	No	No	No	No	Yes	No		No		No	Yes	Pain at the site of Injection, Fever	Approximately 30 hours later from vaccination	No		Naturally	No	For 1 day
2021-05-07 22:04:54	I Agree	Selima sultana	43	Female	Post graduate/Doctoral	Urban	Serum Institute	India	2021-04-05	Mirpur dental college	First Dose	Injection		No			Could not identify	Fever			No	Yes	No		No	No	No	Yes	Pain at the site of Injection, Irritation at the site of Injection, Swelling, Burning sensation, Fever	When I took the vaccine	No	I took paracetamol		No	1day
2021-05-07 22:35:07	I Agree	Shifa ferdoushi	55	Female	Undergrade	Rural	Serum Institute	India	2021-04-20	Mugda medical college	First Dose	Injection	Told to wait for half an hour at the hospital	No			No	Joint pain	Algecal, pregaba 150, neuto B	Algecal, pregaba 150, neuto B		Yes	No		No	No	No	No
2021-05-07 22:43:17	I Agree	Manzurul alam	80	Male	Undergrade	Rural	Serum Institute	India	2021-05-04	Nagar matrisodon khilgaon tilpapara	First Dose	Injection		No			Yes	Gastric problem	Silybin, probio	Silybin, probio	বেগুন	Yes	No		No	No	No	Yes	Pain at the site of Injection, Irritation at the site of Injection, Fever, Body pain, Headache	Nesxt day of the vaccination	No		Took Paracetamol	Yes	2 days
2021-05-08 00:04:14	I Agree	Durga Saha	70	Male	Secondary	Urban	Astrozeneca	India	2021-02-19	Union health complex	First Dose	Injection	no	No			No	no	no	no	no	No	No					No
2021-05-08 09:59:33	I Agree	Najma shahin	48	Female	Higher Secondary	Urban	Serum institute	India	2021-03-06	Police Hospital, Jashore	First Dose	Injection	No	No			No	No	No	No	No	No	No	No	No			No					Normal	No
2021-05-08 11:15:00	I Agree	Sadhan Kumer Das	41	Male	Graduate	Urban	Serum Institute	India	2021-04-20	Mymensingh Medical College	First Dose	Injection	To wait in the centre for 30 min after vaccination	No			No	No		No	No	No	No					Yes	Pain at the site of Injection, Body pain	After one day of vaccinated.Next day morning I was feel it.	No		Automatically	No	It was continued not more than two days.
2021-05-08 12:03:21	I Agree	Saba Salsabil Mahbub Raisa	25	Female	Undergrade	Urban	Asyrozeneca	India	2021-02-16	Karnel Malek Medical College Hospital	First Dose	Injection	no	No			No	no	no	paracetamol	no	Yes	No		No		No	No
2021-05-08 12:08:14	I Agree	Farhana Afroz	50	Female	Graduate	Urban	Astrozeneca	India	2021-02-16	Sarkari karmachati Hospital	First Dose	Injection	no	No			No	Diabetes, Hypertension	Antidiabetic, antihypertensive	paracetamol, antidiabetic, antihypertensive	no	No	No		No		No	Yes	Sick feeling	The day of vaccination	No	I took bed rest for 2 days		Yes	2 days
2021-05-08 12:10:29	I Agree	Md.Mahbub Shahid	60	Male	Post graduate/Doctoral	Urban	Astrozeneca	India	2021-02-16	Sarkari Karmachari Hospital	First Dose	Injection	no	No			No	no	no	paracetamol	no	No	No					No
2021-05-08 16:00:07	I Agree	Mrs Mosarrefa Khatun	36	Female	Higher Secondary	Urban	Serum institute	India	2021-01-28	Rangpur Medical College	First Dose	Injection		No			No	No			Against dirt	No	No		No			Yes	Pain at the site of Injection, Itching, Fever, Body pain	After a few days after vaccination	No			No	Several months
2021-05-08 16:06:43	I Agree	Mosaheb Ahmed Nayem	43	Male	Graduate	Urban	Serum institute	India	2021-01-28	Rangpur Medical College	First Dose	Injection		No				No							No			Yes	Body pain	Several hours after vaccination	No			No	2-3 days
2021-05-08 18:53:22	I Agree	Manju Barua	56	Female	Graduate	Urban	Astrozeneca	India	2021-08-04	Chittagong Medical	First Dose	Injection		No	no	no	No	no	no	no	no	No	No		No	No	No	No
2021-05-08 18:56:06	I Agree	Prem Prashun Barua	69	Male	Graduate	Urban	Omar Ali Matabbar Road,Swapnil Villa,Bakalia,Chattogram	India	2021-08-04	Chittagong Medical	First Dose	Injection		No			No	No	No	No	No	No	No		No	No	No	No
2021-05-08 19:29:33	I Agree	Mafuz Ahammed Shahin	21	Male	Undergrade	Rural	Indian serum institution	India	2021-04-10	Nokla	First Dose	Injection	no	No			No	no	no	no	pain	No	No		No		No	Yes	Pain at the site of Injection	after vaccination	No	normaly		No	no
2021-05-08 20:25:23	I Agree	Proma debi swarna	23	Female	Graduate	Rural	Karuna may chanda	Bangladesh	2021-02-11	Sylhet	Second Dose	Injection		Yes	Agithroumycin,fenadin,zinc			No	No	No	Yes. Skin Allergy	No	No					No			No
2021-05-08 20:29:00	I Agree	Chabi Barua	72	Female	Secondary	Urban	Seram Institute	India	2021-02-13	Shahid Sohrawardi Medical College	First Dose	Injection	Not applicable	No	Not applicable	No	No	No	No	No	No	No	No	Not applicable	No	No	No	Yes	Pain at the site of Injection	After the day of having vaccine	No	Not applicable	Normally	No	1 day
2021-05-08 20:33:50	I Agree	Amiya Kumar Barua	81	Male	Graduate	Urban	Seram Institute	India	2021-02-13	Shahid Sohrawardi Medical College	First Dose	Injection	Not applicable	No	Not applicable	No	No	No	No	No	No	No	No	Not applicable	No	No	No	No		Not applicable	No	Not applicable	Not applicable	No	Not applicable
2021-05-08 21:15:15	I Agree	Proma debi swarna	26	Female	Graduate	Rural	Shelly chanda	India	2021-02-11	Sylhet	Second Dose	Injection		No		No	No	No	No	No	No	No	No		No			No
2021-05-08 21:20:37	I Agree	Proma debi swarna	20	Female	Graduate	Rural	Kripesh kumar chanda	India	2021-02-18	Sylhet	Second Dose	Injection		Yes	Zinc,agithroucin		Yes	Fever,cough			No	No						No
2021-05-08 21:43:31	I Agree	A	63	Male	Graduate	Rural	Astrozeneca	India	2021-03-19	Government Hospital, Narayanganj	First Dose	Injection	No	No				Hypertension			No		No					No
2021-05-08 21:46:09	I Agree	B	57	Female	Graduate	Rural	Astrozeneca	India	2021-03-23	Government Hospital, Narayanganj	First Dose	Injection		No				Low blood pressure	No		No	Yes						No
2021-05-08 21:46:25	I Agree	B	41	Female	Graduate	Rural	Astrozeneca	India	2021-03-23	Government Hospital, Narayanganj	First Dose	Injection		No				Low blood pressure	No		No	Yes						No
2021-05-08 21:51:36	I Agree	B	36	Female	Undergrade	Rural	Astrozeneca	India	2021-03-23	Government Hospital, Narayanganj	First Dose	Injection		No				Low blood pressure			No	Yes						No
2021-05-08 22:02:39	I Agree	Mijanur Rahman	48	Male	Graduate	Rural	Astrozeneca	India	2021-03-12	Jhalakathi Govt Hospital	First Dose	Injection		No				Lung problem			No	Yes						Yes	Pain at the site of Injection, Fever	After vaccination	No		It disappeared naturally	No	24 hours after vaccination
2021-05-08 22:17:34	I Agree	Tridip barua	57	Male	Post graduate/Doctoral	Urban	Seram Institute	India	2021-02-15	Shahid SohrawardiMedical College	First Dose	Injection	Not applicable	No	Not applicable	No	No	No	No	No	No	No	No	Not applicable	No	No	No	Yes	Pain at the site of Injection, Body pain	After injection	No	Not applicable	Normally	No	For 1 day
2021-05-08 22:30:53	I Agree	Pramila Saha	36	Female	Graduate	Urban	Astrozeneca	India	2021-02-17	Union health complex	First Dose	Injection	To stay there for sometimes for seeing if there is complaints	No			Yes	sore throat	no	no	Yes, metal	Yes	No		No		No	Yes	Pain at the site of Injection, Fever	the day of vaccination	No	Took medicine		Yes	2 days
2021-05-08 22:44:37	I Agree	Gowtam Saha	49	Male	Undergrade	Urban	Astrozeneca	India	2021-02-17	Union health complex	First Dose	Injection	To wait there for sometimes to check the instant problem	No			No	No	no	no	Dust Allergy	No	No					Yes	Pain at the site of Injection	The day of vaccination	No		of it own	No
2021-05-08 22:50:25	I Agree	Sandha Rani Saha	65	Female	Undergrade	Rural	Astrozeneca	India	2021-02-17	Union health complex	First Dose	Injection	To stay there for sometime to check instant problem	No			No	Hypertension	Antihypertensive	Antihypertensive	Yes,eggplant	No	No		No		No	Yes	Pain at the site of Injection	the day of vaccination	No	took medicine		Yes	3 days
2021-05-08 22:53:45	I Agree	Uttam Saha	40	Male	Graduate	Rural	Astrozeneca	India	2021-02-15	Union health complex	First Dose	Injection	no	No			No	Diabetes	Antidiabetic	Antidiabetic, paracetamol	No	No	No					Yes	Pain at the site of Injection	the day of vaccination	No	by taking medicine		Yes	3 days
2021-05-08 22:57:25	I Agree	Trina Saha	33	Female	Graduate	Rural	Astrozeneca	India	2021-02-17	Union health complex	First Dose	Injection	To stay there to check instant problem	No			No	no	no	paracetamol	no	Yes	No		No		No	Yes	Pain at the site of Injection	The day of vaccination			By taking medicine, paracetamol	Yes	3 days
2021-05-08 23:03:45	I Agree	Palash Chandra Saha	67	Male	Secondary	Rural	Astrozeneca	India	2021-02-17	Union health complex	First Dose	Injection	To stay there for sometime to check instant problem	No			No	Heart disease, atherosclerosis	Cardioprotective medicine	Paracetamol	Yes,eggplant	No	No					Yes	Pain at the site of Injection, Fever, Weakness	The day of vaccination	No		By taking medicine	Yes	7 days
2021-05-08 23:07:50	I Agree	Rani Bala Saha	58	Female	Primary	Rural	Astrozeneca	India	2021-02-17	Union health complex	First Dose	Injection	To stay there to check instant problem	No			No	no		paracetamol	no	Yes	No		No		No	Yes	Fever	The day of vaccination	No		Taking medicine	Yes	1 dat
2021-05-08 23:10:26	I Agree	X	69	Male	Undergrade	Rural	Astrozeneca	India	2021-02-17	Union health complex	First Dose	Injection	no	No			No	no	no	no	no	No	No					No
2021-05-08 23:41:14	I Agree	Mridul	51	Male	Graduate	Urban	Astrozeneca	India	2021-02-10	Tangail	First Dose	Injection	No	No			No	Cardiac	Indever	NO	NO	No	No		No			Yes	Pain at the site of Injection, Fever	Pain	No			No
2021-05-09 00:06:29	I Agree	Sumi	25	Female	Undergrade	Rural	Astrozeneca	India	2021-04-11	Comilla	First Dose	Injection		No				No	No		No	Yes						Yes	Fever	After vaccination	No		Naturally disappeared	No	Few hours
2021-05-09 00:07:32	I Agree	Mohammed Aziz	48	Male	Graduate	Urban	AstraZeneca	India	2021-03-13	Anderkilla General Hospital	First Dose	Injection		No			No	No	No									No
2021-05-09 00:09:46	I Agree	Palash Barua	40	Male	Graduate	Urban	AstraZeneca	India	2021-03-11	Anderkilla General Hospital	First Dose	Injection		No			No	No										No
2021-05-09 00:12:11	I Agree	Priya	26	Female	Undergrade	Urban	Astrozeneca	India	2021-03-04	Dhaka	Second Dose	Injection		No			No	No	No	No	No	Yes	No		No	No	No	No
2021-05-09 00:13:18	I Agree	Jamal Uddin	53	Male	Undergrade	Urban	AstraZeneca	India	2021-01-30	CSCR Hospital Chittagong	First Dose	Injection		No				No										No
2021-05-09 00:13:32	I Agree	Mehzabin	38	Female	Undergrade	Urban	Astrozeneca	India	2021-03-05	Mymensingh	Second Dose	Injection		No				No				No	No		No	No	No	No
2021-05-09 00:15:09	I Agree	Arshi	27	Female	Undergrade	Urban	Astrozeneca	India	2021-03-20	Dhaka	First Dose	Injection		No			Could not identify	No	No	No	No	No	No		No	No	No	No
2021-05-09 00:16:52	I Agree	Giash	56	Male	Higher Secondary	Urban	Astrozeneca	India	2021-04-08	Dhaka	First Dose	Injection		No			No	No	No	No	No	No	No		No	No	No	Yes	Pain at the site of Injection, Fever, Body pain			Automatically		No	2 days
2021-05-09 00:20:56	I Agree	Hero Ahmed	23	Male	Graduate	Urban	Astrozeneca	India	2021-04-17	Dhaka	First Dose	Injection		No				No							No	No	No	No
2021-05-09 00:24:14	I Agree	Rohima Akter	49	Female	Graduate	Urban	Astrozeneca	India	2021-03-03	Dhaka	Second Dose	Injection		No			No	No				Yes	No		No	No	No	No
2021-05-09 00:25:22	I Agree	Moushumi Islam	36	Female	Graduate	Urban	Astrozeneca	India	2021-03-04	Dhaka	Second Dose	Injection		No			No	No				Yes	No		No	No	No	No
2021-05-09 00:26:18	I Agree	Julfia Jahanara	42	Female	Undergrade	Urban	oxford astrazeneca	india	4/15/0021	mymensingh medical college hospital	First Dose	Injection	no	No			No	no	no	no		Yes	No		No			Yes	Pain at the site of Injection	next day after vaccination	No			No	4-4 days
2021-05-09 00:28:16	I Agree	Nahid Khanom	50	Female	Graduate	Urban	Astrozeneca	India	2021-03-04	Dhaka	Second Dose	Injection		No				No	No	No	No	Yes	No		No	No	No	No
2021-05-09 00:30:48	I Agree	Akhter khan	68	Male	Post graduate/Doctoral	Urban	Astrozeneca	India	2021-02-17	BSMMU, Dhaka	Second Dose	Injection		No			No	No	No	No	No	Yes	No		No	No	No	No
2021-05-09 00:31:14	I Agree	Md Abu Saleque	37	Male	Graduate	Urban	oxford astrazeneca	india	2/12/0021	jamalpur	First Dose	Injection		No			No	no	np	no	no	Yes	No		No			Yes	Pain at the site of Injection	within 2 days of vaccination	No	subsides naturally		No	4-5 dayd
2021-05-09 00:37:42	I Agree	Shofikul Islam	46	Male	Graduate	Urban	Astrozeneca	India	2021-02-04	Mymensingh	Second Dose	Injection		No				No										No
2021-05-09 00:39:43	I Agree	Nazrul Islam	59	Male	Graduate	Urban	Astrozeneca	India	2021-02-17	Barisal	Second Dose	Injection		No				No										No
2021-05-09 00:42:18	I Agree	Sumon khan	31	Male	Graduate	Rural	Astrozeneca	India	2021-02-18	Rajshahi	Second Dose	Injection		No				No										No
2021-05-09 11:00:33	I Agree	Dilip kumar	74	Male	Graduate	Rural	Indian Serum institute	India	2021-03-10	Bera,Pabna	Second Dose	Injection	No	No			No	No	No	No	No	Yes	No		No	No	No	No
2021-05-09 12:09:31	I Agree	সীমা রানী দাস	53	Female	Secondary	Urban	Astrazeneca	India	2021-05-14	Mugda Hospital	Second Dose	Injection		No			No	Hypertension, diabetes			No	Yes	No		No		No	No
2021-05-09 12:09:52	I Agree	উজ্জ্বল বিশ্বাস	41	Male	Graduate	Urban	Astrazeneca	India	2021-03-11	Mugda Hospital	Second Dose	Injection		No			No	Hypertension, diabetes			No	Yes	No					No
2021-05-09 12:10:23	I Agree	দেবল সাহা	36	Male	Graduate	Urban	Astrazeneca	India	2021-03-19	Mugda Hospital	Second Dose	Injection		No			No	Hypertension, diabetes			No	Yes	No					No
2021-05-09 12:20:20	I Agree	Hasina Rabbi	33	Female	Post graduate/Doctoral	Urban	Serum Institute	India	2021-05-02	Mohammadpur Fertility Center	First Dose	Injection	NO	Yes	Ivera Favipiravir	No		No	No	Vitamin D	No		No		No			Yes	Fever, Body pain	1 day after 1st dose	No	Vitamin D medication		Yes	1 month
2021-05-09 13:04:17	I Agree	Mina barua	47	Female	Higher Secondary	Urban	Oxford	England	2021-02-13	Baluchora Cantonment	First Dose	Injection		No			No	N/A				Yes	Yes	No	No	No	No	No
2021-05-09 13:05:55	I Agree	Niranjan Chakma	56	Male	Graduate	Urban	Oxford	England	2021-03-04	Bandortilla,ctg	First Dose	Injection		No				No										No
2021-05-09 13:37:41	I Agree	Md. Kamal	53	Male	Post graduate/Doctoral	Urban	Astrozeneca	India	2021-04-16	Chittagong Medical College	First Dose	Injection	Taking rest for half an hour in case of any side-effects.	No			Could not identify	High blood pressure	No	No	Yes, skin Allergy	Yes	No					Yes	Irritation at the site of Injection, Fever	After 3/4 hours of vaccination	No		After taking a napa extra tablet.	Yes	1 day.
2021-05-09 13:42:49	I Agree	Shahana Chowdhury	49	Female	Secondary	Urban	Serum Institute	India	2021-04-10	Mohakhali	First Dose	Injection		No			No	Diabetes	Comnet500	No	No	No	No		No		No	No
2021-05-09 13:43:38	I Agree	Mrs. Sultana	56	Female	Graduate	Urban	Astrozeneca	India	2021-04-18	Chittagong Medical College	First Dose	Injection	Taking rest in case of any side-effects.	No			Could not identify	No			Dust Allergy	Yes	No		No			Yes	Pain at the site of Injection, Irritation at the site of Injection, Fever, Body pain	After 5/6 hours of vaccination	No		Taking medicines following a doctor's advice	Yes	2 days
2021-05-09 13:51:12	I Agree	Amina Khatun	65	Female	Primary	Urban	astrazeneca	India	2021-04-18	Chittagong Medical College	First Dose	Injection	No	No			No	High blood pressure	No	No	No	Yes	No		No			Yes	Irritation at the site of Injection, Body pain	After some hours of vaccination	No		After taking some pain killer medicines	Yes	2 days
2021-05-09 13:58:46	I Agree	Md. Abdul goni	31	Male	Graduate	Urban	India	India	2021-03-03	Dhaka dental college	First Dose	Injection	No	No			Yes	Diabetes	No		Yes	Yes	No		No	No	No	Yes	Pain at the site of Injection, Irritation at the site of Injection, Fever, Body pain	At the same day of vaccination	No			Yes	2days
2021-05-09 14:03:07	I Agree	Bazlur Rahman	63	Male	Graduate	Urban	Serum institution	India	2021-04-28	Khulna Sador Hospital, Khulna	Second Dose	Injection	No	No			No	No	No	No	No	No	No	I haven't taken				yes	Pain at the site of Injection	Sometimes later after vaccination	No	I didn't take any step.It was a normal pain which is usually felt after any type of vaccination	It was subsided naturally	No	I felt it maximum 1 day. Then it was vanished and i felt nnormal.
2021-05-09 14:50:18	I Agree	Md Harun or Rashid	72	Male	Higher Secondary	Urban	Serum	India	2021-03-23	Rajshahi Medical College	First Dose	Injection	After 1st dose light fever	No			Yes	No	No	No	No	No	No		No	No	No	yes	Fever	After 1st dose	No			No	4-5 days
2021-05-09 15:08:53	I Agree	Motiur Rhaman	69	Male	Post graduate/Doctoral	Rural	Serum Institute	India	2021-04-11	Satkhira sadar hospital.	First Dose	Injection		No			No	Diabetes. High blood pressure.			Hypersensitive reaction.( red meat, shrimp)	No	No					yes	weakness for next some hours or may be a day.		No			No	For next few hours, maybe till the next morning.
2021-05-09 15:19:36	I Agree	Nazmun nahar.	73	Female	Graduate	Rural	Serum Institute.	India	2021-04-11	Satkhira sadar hospital	First Dose	Injection		No			No	Hypertension(high blood pressure)	Telmidip 80/5 for hypertension	Telmidip 80/5	No	No	No		No			No
2021-05-09 16:41:45	I Agree	Margina Begum	62	Female	Graduate	Urban	Serum Institute	India	2021-03-11	Mirpur	First Dose	Injection		No			Yes	no	Diabetes (Linamate) Thyrox	no	no	Yes	No		No		No	Yes	Pain at the site of Injection, Body pain	The day of vaccination	No			No	3 days
2021-05-09 16:44:04	I Agree	Nobo Saha	63	Male	Secondary	Urban	Astrozeneca	India	2021-03-02	Union health complex	First Dose	Injection	No	No			No	No	no	no	Chemical Allergy	No	No					No
2021-05-09 16:47:28	I Agree	Moni Saha	39	Female	Secondary	Urban	Astrozeneca	India	2021-03-03	Union health complex	First Dose	Injection		No			No	no	no	no	no	Yes	No		No		No	No
2021-05-09 16:52:33	I Agree	Gaya Saha	56	Male	Secondary	Urban	Astrozeneca	India	2021-03-18	Union health complex	First Dose	Injection	no	No			No	hypertension, acidity	antihypertensive, antacids	Antihypertensive, antacids	no	No						No
2021-05-09 16:58:52	I Agree	Moni Rani Saha	45	Female	Graduate	Urban	Astrozeneca	India	2021-02-13	Union health complex	First Dose	Injection	No	No			No	Diabetes	Antidiabetic	Antihypertensive	no	Yes	No		No		No	No
2021-05-09 17:01:43	I Agree	Prodip Kumar Saha	57	Male	Graduate	Urban	Astozeneca	India	2021-04-24	Union health complex	First Dose	Injection		No			No	No	no	no	no	No	No					Yes	Fever	The day of vaccination	No	Paracetamol		Yes	1day
2021-05-09 17:24:17	I Agree	Porimal Saha	54	Male	Higher Secondary	Urban	Astrozeneca	India	2021-02-27	Union health complex	First Dose	Injection	no	No			No	no	no	no	no	No	No					No
2021-05-09 17:26:28	I Agree	Jomuna Saha	67	Female	Primary	Urban	Astrozeneca	India	2021-02-27	Union health complex	First Dose	Injection	no	No			No	Heart problem	Cardio protective medicines	Cardioprotective medicine	no	No	No		No		No	No
2021-05-09 17:49:06	I Agree	Jharna Saha	55	Female	Undergrade	Urban	Astrozeneca	India	2021-03-01	Union health complex	First Dose	Injection		No			No	High pressure, High cholesterol, other heart problem	Antihypertensive, high cholesterol,cardio protective	Cardio protective		Yes	No		No		No	No
2021-05-09 17:52:38	I Agree	Vupesh chandra saha	65	Male	Secondary	Urban	Astrozeneca	India	2021-03-01	Union health complex	First Dose	Injection	no	No			No	Blood pressure	antihypertensive	antihypertensive	Yes	No	No		No		No	No
2021-05-09 17:56:49	I Agree	Renu Bala Saha	78	Female	Secondary	Urban	Astrozeneca	India	2021-03-01	Union health complex	First Dose	Injection	No	No			No	Blood pressure	Antihypertensive	Antihypertensive	No	No	No		No		No	No
2021-05-09 19:23:22	I Agree	Sudarshan Saha	49	Male	Graduate	Urban	Astrozeneca	India	2021-02-24	Sherpur	First Dose	Injection		No			No	diabetes,blood pressure	antidiabetic, antihypertensive	antidiabetic, antihypertensive	no	No	No					No
2021-05-09 19:29:38	I Agree	Vajana Saha	50	Female	Graduate	Rural	Astrozeneca	India	2021-02-09	Union health complex	First Dose	Injection	no	No			No	Blood pressure	antihypertensive	antihypertensive, paracetamol	no	Yes	No		No		No	Yes	Fever	Day of vaccination	No	By taking paracetamol		Yes	1 day
2021-05-09 19:39:26	I Agree	Ashutosh Saha	62	Male	Secondary	Rural	Astrozeneca	India	2021-03-09	Union	First Dose	Injection		No			No	Hypertension, Heart block, Diabetes	Antihypertensive, Cardioprotective medicine, Antidiabetic	Antihypertensive, antidiabetic, cardio protective medicines, paracetamol	No	No	No					Yes	Fever	The day of vaccination	No		By taking paracetamol	Yes	1 day
2021-05-09 19:42:52	I Agree	Sopna Saha	73	Female	Secondary	Urban	Astrozeneca	India	2021-02-24	Tangail	First Dose	Injection		No			No	Hypertension	Antihypertensive	antihypertensive	no	Yes	No		No		No	No
2021-05-09 20:31:59	I Agree	Tasnim Rahman Richi	22	Female	Undergrade	Urban	Astrozeneca	India	2021-03-20	Sheikh hasina medical college hospital	Second Dose	Injection	None	No			No	No	No	No	Yes. Beef, prawn	Yes	No		No			No
2021-05-09 21:00:19	I Agree	Muhammad Abdul Malek	50	Male	Graduate	Urban	Serum Institute	India	2021-04-17	Barguna General Hospital	Second Dose	Injection		No			No	Diabetes (not sever), ear disease, some heart diseases	Clopidogrel USP, Nitroglycerin USP, Clonazepam	Same as before	No	Yes	No					Yes	Pain at the site of Injection, Drowsiness	After vaccinated there was a little pain at the site, it was just two days long	No		Naturally neutralized	No	Two days
2021-05-09 21:22:39	I Agree	Jesmin alam	26	Female	Post graduate/Doctoral	Foreign	Astrazenca	India	2021-03-22	General hospital,anderkilla	First Dose	Injection	No	No	N/A	No	No	No	No	No	No	Yes	No	N/A	No	No	No	Yes	Irritation at the site of Injection, Vertigo (dizziness)	After giving the vaccine	No	N/A	By the course of time	No	22-23 hours
2021-05-10 00:22:26	I Agree	Aktar Uddin	67	Male	Graduate	Urban	Astrozeneca	India	2021-04-08	PG hospital	First Dose	Injection	No	No			Could not identify	No			No	Yes						Yes	Pain at the site of Injection, Irritation at the site of Injection	After vaccination	No		It subsided naturally	No	2 to 3 days after vaccination
2021-05-10 00:25:33	I Agree	Shahina Begum	49	Female	Undergrade	Urban	Astrozeneca	India	2021-04-18	Mohammadpur Matrisadan Hospital	First Dose	Injection	No	No				No				Yes						Yes	Fever	After vaccination	No	Took medicine		Yes	Several days after vaccination
2021-05-10 01:39:25	I Agree	Abdullah	58	Male	Post graduate/Doctoral	Urban	astrazeneca	India	2021-05-05	rab hq, uttara	First Dose	Injection	No	No	Null	Null	No	No	No	Paracetamol	No	Yes	No	Null	No	No	No	Yes	Fever, Body pain	Some hours later	No	Null	Self mitigated	Yes	1 day
2021-05-10 10:34:00	I Agree	Poroshmoni Saha	43	Female	Primary	Urban	Astrozeneca	India	2021-03-08	Union health complex	First Dose	Injection	no	No			No	no	no	no	no	Yes	No		No		No	No
2021-05-10 10:36:03	I Agree	Kashi Nath Saha	70	Male	Primary	Urban	Astrozeneca	India	2021-03-08	Gazipur	First Dose	Injection	No	No			No	no	no	no	no	No	No					No
2021-05-10 10:46:20	I Agree	Laxman Saha	72	Male	Primary	Rural	Astrozeneca	India	2021-02-04	Union health complex	First Dose	Injection	to stay there to Check instant problem	No			No	Diabetes	Antidiabetic	Antidiabetic	no	No	No					No
2021-05-10 10:49:17	I Agree	Rina Saha	57	Female	Primary	Rural	Astrizeneca	India	2021-02-04	Union health complex	First Dose	Injection	To stay there to check instant problem	No			No	Blood Pressure	Antihypertensive	Antihypertensive	No	Yes	No		No		No	No
2021-05-10 11:18:13	I Agree	Nazir Hossain	45	Male	Graduate	Urban	Astrozeneca	India	2021-03-14	Gazipur	First Dose	Injection	No	No			No	no	no	no	Dust Allergy	No	No					Yes	Pain at the site of Injection, Fever	the day of vaccination	No		of it own	No	2-3 days
2021-05-10 11:57:22	I Agree	Yunos Ali	40	Male	Graduate	Urban	Astrozeneca	India	2021-03-14	Gazipur	First Dose	Injection	No	No			No	Blood pressure	no	no	yes	No	No					No
2021-05-10 12:01:12	I Agree	Asadullah	43	Male	Graduate	Rural	Astrozeneca	India	2021-04-12	Natore Government Hospital	First Dose	Injection		No				No				Yes						Yes	Pain at the site of Injection, Fever	After vaccination	No		Subsided naturally	No	Several days
2021-05-10 12:10:01	I Agree	Ibrahim Khalil	21	Male	Graduate	Rural	Astrozeneca	India	2021-04-22	Khulna Government Hospital	First Dose	Injection		No				No				Yes	No					Yes	Pain at the site of Injection, Fever	After vaccination	No		Subsided naturally	No	Several days
2021-05-10 12:14:43	I Agree	Aysha Begum	35	Female	Undergrade	Rural	Astrozeneca	India	2021-05-02	Shatkhira	First Dose	Injection		No			Could not identify	High blood pressure				Yes						Yes	Fever		No		Naturally	No	Several days
2021-05-10 12:16:17	I Agree	Bashir Ahmed	51	Female	Graduate	Urban	Astrozeneca	India	2021-02-23	Jhalakati Sadar Hospital	First Dose	Injection		No			No	No		No	No	No	No		No	No	No	No
2021-05-10 12:23:50	I Agree	Arifur Rahman	49	Male	Secondary	Rural	Serum Institute	India	2021-02-25	shibganj upazilla hospital	First Dose	Injection	no	No			Could not identify	no	no	napa	allergic food	Yes	No	no	No	No	No	Yes	Pain at the site of Injection, Irritation at the site of Injection, Swelling, Fever, Nausea	few hours after vaccination	No	taking napa		Yes	2 days
2021-05-10 12:24:00	I Agree	Nesfun Juthi	24	Female	Undergrade	Rural	Astrozeneca	India	2021-04-18	Sirajganj Government Hospital	First Dose	Injection		No			Could not identify	No			No	Yes	No					Yes	Pain at the site of Injection, Fever	After vaccination	No		Subsided naturally	No	Several days
2021-05-10 12:26:31	I Agree	Aleya begum	55	Female	Higher Secondary	Rural	Astrozeneca	India	2021-05-05	Sirajganj	First Dose	Injection		No			Could not identify	No				Yes	No					Yes	Fever	After vaccination	No		Subsided naturally	No	Several hours
2021-05-10 13:58:19	I Agree	Krishna Saha	43	Male	Graduate	Urban	Astrozeneca	India	2021-02-25	Dhaka Bokkho badhi Hospital	First Dose	Injection	To stay there 30 mins to observe instant problem	No			No	Bloid Pressure	Antihypertensive	Antihypertensive		No	No					Yes	Pain at the site of Injection	The day of vaccination	No		of it own	No	2 days
2021-05-10 14:04:02	I Agree	Mondira Saha	38	Female	Graduate	Urban	Astrozeneca	India	2021-03-04	Dhaka bokkho badhi hospital	First Dose	Injection	To stay there 30 mind to observe instant problem	No			No	no	no	no	no	Yes	No		No		No	No
2021-05-10 14:32:07	I Agree	Rani Sharma	55	Female	Higher Secondary	Rural	Astrozeneca	India	2021-04-15	Thakurgaon	First Dose	Injection	No	No			Could not identify	No				Yes	No	No				Yes	Pain at the site of Injection, Fever	After vaccination	No		Subsided naturally		24 hours after vaccination
2021-05-10 14:43:40	I Agree	Vaskor Biswas	36	Male	Post graduate/Doctoral	Urban	Serum Institute, India	India	2021-04-26	Sheikh Hasina Burn & Plastic Surgery Hospital, Dhaka	Second Dose	Injection	No	No			Could not identify	No	No	Paracetamol	No	Yes	No					Yes	Pain at the site of Injection, Fever		No			Yes	One day
2021-05-10 15:02:21	I Agree	Rezaul Karim Talukder	55	Male	Post graduate/Doctoral	Urban	Oxford austrzian	India	2021-02-14	Shekh Hasina Medical college Hospital, Tangail	Second Dose	Injection	No	No	NA	NA	Yes	No	Paracetamo, zinc,	No	Na	No	No	Na				Yes	Body pain		No			No
2021-05-10 15:09:41	I Agree	Anisur rahman	31	Male	Post graduate/Doctoral	Urban	Saram Institute	India	2021-02-10	Dantal College Hospital mirpur dhska	Second Dose	Injection	No	No			No	No	No	No	No	No	No		No			No
2021-05-10 16:08:12	I Agree	Taiyeb Ahmed	60	Male	Post graduate/Doctoral	Urban	Oxford	America	2021-03-10	Mirzapur health complex	Second Dose	Injection	no	No			No	no	no	no	no	No	No					No
2021-05-10 16:15:41	I Agree	A. K. M. Azad	39	Male	Graduate	Rural	Serum Institute	India	2021-04-18	Nagar matrisadan kedro, pallabi	First Dose	Injection		No			No	Diabetes, High BP	Olmezest 20		Food allergies( shrimp, beef, eggplant)	Yes	No		No			Yes	Vertigo (dizziness), Drowsiness	After 3hrs of vaccination	No	I took rest for 2 days		No	8hrs
2021-05-10 16:20:23	I Agree	Rahima Khatun Josna	54	Female	Graduate	Rural	Seum Institute	India	2021-04-18	Nagar matrisadan kendro, pallabi	First Dose	Injection		No			No	High BP, cardiac condition	Losardil plus		Dust allergy	Yes	No		No			Yes	Pain at the site of Injection, Irritation at the site of Injection, Fever	After 7 hrs of vaccination	No	I took rest		No	For one day
2021-05-10 16:38:06	I Agree	Ashok Saha	45	Male	Post graduate/Doctoral	Rural	Serum Institute	India	2021-04-11	250 bed hospital,B-baria	Second Dose	Injection		No			No	Some cold	Montene -10	Montene -10	Allergy	No	No		No			No
2021-05-10 17:15:17	I Agree	Dr.Anannya Das Gupta	22	Female	Graduate	Rural	Astrozeneca	India	2021-02-11	Ukhiya, Coxbazar	First Dose	Injection		No			No	No	No	Paracetamol	No	Yes	No		No			Yes	Pain at the site of Injection, Fever	12 hrs following vaccination	No		Spontaneously	Yes	24 hrs
2021-05-10 19:18:12	I Agree	Anita Gope	35	Female	Graduate	Urban	Astrozeneca	India	2021-02-15	Gazipur	First Dose	Injection	No	No			No	No	no	no	no	Yes	No		No		No	No
2021-05-10 19:53:26	I Agree	Asish Kumar Gope	44	Male	Graduate	Urban	Astrozeneca	India	2021-02-11	Gazipur	First Dose	Injection	no	No			No	Hypertension	Antihypertensive	Antihypertensive	no	No	No					No
2021-05-10 20:36:31	I Agree	Bidhan Bhuson Roy	26	Male	Graduate	Urban	Serum institute	India	2021-04-12	Shekh Hasina Medical College	Second Dose	Injection	Number was given to contact in case of emergency	No			No	No	No	No	No	Yes	No		No			No
2021-05-10 20:49:51	I Agree	Nazma Sultana	41	Female	Graduate	Urban	Astrozeneca	India	2021-02-20	Union health complex	First Dose	Injection	No	No			No	no	no	no	no	No	Yes		No		No	No
2021-05-10 20:53:55	I Agree	Provati Saha	55	Female	Primary	Urban	Astrozeneca	India	2021-02-28	Union health complex	First Dose	Injection	No	No			No	Hypertension	antihypertensive	no	no	Yes	No		No		No	No
2021-05-10 21:21:01	I Agree	Sontosh Saha	74	Male	Primary	Urban	Astrozeneca	India	2021-02-28	Union health complex	First Dose	Injection	No	No			No	Severe Allergy	Anti allergic	Anti Allergic	Yes,eggplant	No	No					No
2021-05-10 21:23:52	I Agree	Mina Saha	43	Female	Higher Secondary	Urban	Astrozenena	India	2021-03-02	Union health complex	First Dose	Injection	no	No			No	no	no	no	no	Yes	No		No		No	No
2021-05-10 22:40:54	I Agree	Md. Mostafijur Rahman	51	Male	Post graduate/Doctoral	Urban	Astrojene	Oxford	2021-04-28	Cancer institute	Second Dose	Injection	No	No			Yes	Fever	Zimax,	No	Yes	No	No					Yes	Pain at the site of Injection, Swelling, Fever	After 2 days	No		No	No
2021-05-10 22:56:26	I Agree	Susmita saha	20	Female	Higher Secondary	Urban	Astrozeneca	India	2021-03-02	Chittagong medical college	First Dose	Injection		No			No	No			No	No	No		No		No	No
2021-05-10 23:03:23	I Agree	Subrata Saha	45	Male	Post graduate/Doctoral	Urban	Astrozeneca	India	2021-02-24	Tangail Medical College	First Dose	Injection	no	No			No	Cardiac problem, bloid pressure	Antihypertensive, Cardioprotective medicine	Antihypertensive, Cardioprotective medicine	No	No	No					No
2021-05-10 23:06:12	I Agree	Madhumita sen gupta	31	Female	Post graduate/Doctoral	Urban	Seram institute	India	2021-04-13	Dhaka Shishu hospital	Second Dose	Injection	None	No			No	no	no	no	Yes. Prawn, eggplant.	No	No		No	No	No	No			No			No
2021-05-10 23:07:56	I Agree	Samir Saha	44	Male	Post graduate/Doctoral	Urban	Astrozeneca	India	2021-03-11	Dhaka	First Dose	Injection	no	No			No	Blood pressure	Antihypertensive	Antihypertensive	no	No	No					Yes	Pain at the site of Injection	the day of vaccination	No		of it own	No	1 day
2021-05-10 23:15:13	I Agree	Ratna Saha	39	Female	Graduate	Urban	Astrozeneca	India	2021-04-04	Dhaka	First Dose	Injection	no	No			No	no	no	no	no	Yes	No		No		No	No
2021-05-10 23:20:08	I Agree	Ratna Saha	50	Female	Graduate	Urban	Astrozeneca	India	2021-02-14	Mymensingh medical College	First Dose	Injection	no	No			No	blood pressure	antihypertensive	antihypertensive	no	Yes	No		No		No	No
2021-05-10 23:29:32	I Agree	Himangsu Sekhor Saha	61	Male	Post graduate/Doctoral	Urban	Astrozeneca	India	2021-02-14	Mymensingh medical College	First Dose	Injection	no	No			No	asthma,brain tumor,migrants	anriasthmatic,antitumor,anti migrants, antiallergenic	anriasthmatic,antitumor,anti migrants, antiallergenic	yes	No	No					No
2021-05-10 23:33:35	I Agree	Ratan Saha	77	Male	Graduate	Urban	Astrozeneca	India	2021-02-16	URPS(NGO)	First Dose	Injection	No	No			No	blood pressure	antihypertensive	antihypertensive	no	No	No					No
2021-05-10 23:38:19	I Agree	Gayetri Saha	25	Female	Secondary	Urban	Astrozeneca	India	2021-02-16	UTPS(NGO)	First Dose	Injection	no	No			No	Asthma, blood pressure,	Antiasthmatic inhaler,antihypertensive,	Antiasthmatic inhaler,antihypertensive,	no	Yes	No		No		No	Yes	Pain at the site of Injection	the day of vaccination	No		of it own	No	1 day
2021-05-11 00:42:28	I Agree	Sarif Mahammad Salauddin	34	Male	Graduate	Urban	Astrazeneca	India	2021-04-08	Sir Salimullah Medical College and Mitford Hospital, Fhaka	Second Dose	Injection		No			No	Cough Variant Asthma		Paracetamol		Yes	No					Yes	Pain at the site of Injection	1 to 2 hours vaccination	No		By Taking Paracetamol	Yes	About 10 to 12 hours
2021-05-11 04:08:29	I Agree	Md abul hashem	66	Male	Secondary	Urban	Abul hashem	Bangladesh	2021-02-12	Hathazari	Second Dose	Injection	No	No			No	Hypertension, diabetes	Mefin, osartil			No	No		No	No	No	Yes	Pain at the site of Injection
2021-05-11 11:30:02	I Agree	Md. Rashedul Islam	20	Male	Post graduate/Doctoral	Urban	Serum Inst.	India	2021-05-06	Kidney Hospital Dhaka	Second Dose	Injection	No	No			Could not identify	No				No	No					No						No
2021-05-11 12:15:40	I Agree	mukti saha	45	Female	Graduate	Rural	Astrozeneca	india	2021-02-16	Union health complex	First Dose	Injection		No			No	eczema	no	paracetamol	no	Yes	No		No		No	Yes	Fever		No			Yes	1 day
2021-05-11 12:22:23	I Agree	Shaymol Saha	73	Male	Graduate	Rural	Astrozeneca	India	2021-02-16	Union health complex	First Dose	Injection		No			Could not identify	Diabetes, heart disease, hypertension	Yes, antidiabetic, antihypertensive, cardioprotective			No						No
2021-05-11 12:27:17	I Agree	Komola Paul	54	Female	Post graduate/Doctoral	Urban	Astrozeneca	India	2021-02-09	Gazipur	First Dose	Injection		No			Could not identify	Piles	Homeopathy			Yes						Yes	Headache	After some time of vaccination	No	Took medicine		Yes	24 hours after vaccination
2021-05-11 12:32:06	I Agree	Shodanondo Paul	47	Male	Graduate	Urban	Astrozeneca	India	2021-02-09	Gazipur	First Dose	Injection		No				High cholesterol	Medicine for high cholesterol			No						Yes	Fever	After few hours of vaccination	No	Took Napa		Yes	24 hours after vaccination
2021-05-11 12:39:29	I Agree	Shantosh Kumar Paul	67	Male	Higher Secondary	Urban	Astrozeneca	India	2021-02-11	Gazipur	First Dose	Injection		No			Could not identify	Cold, high cholesterol	Anti tussive			Yes						Yes	Fever	After few hours	No	Napa		Yes	1day after vaccination
2021-05-11 12:41:37	I Agree	Mukta Rani Paul	59	Female	Higher Secondary	Urban	Astrozeneca	India	2021-02-11	Gazipur	First Dose	Injection		No			Could not identify	No				Yes						Yes	Vertigo (dizziness)	After vaccination	No	Nl	Subsided naturally	No	Several hours
2021-05-11 12:43:45	I Agree	Ambia begum	65	Female	Primary	Rural	Astrazeneca	India	2021-05-05	Upazila health center, Homna	First Dose	Injection		No			No	Gallbladder stone, previous stroke(minor) history.	Yesyes		Yes	No	No	No	No	No	No	Yes	Drowsiness	After returning home from health center of my 2nd dose	No		After vaccination day it subside automatically	No	Around 6 hours
2021-05-11 12:44:42	I Agree	Selina Begum	60	Female	Graduate	Rural	Astrozeneca	India	2021-02-10	Gazipur	First Dose	Injection		No			No	Diabetes, blood pressure	Antidiabetic, antihypertensive			Yes						No
2021-05-11 12:48:14	I Agree	Abu Ahmed Jubayer	51	Male	Graduate	Rural	Astrozeneca	India	2021-02-10	Union Health Complex	First Dose	Injection		No			Could not identify	No				No						No
2021-05-11 12:50:30	I Agree	Rakibul Salekin	27	Male	Graduate	Rural	Astrozeneca	India	2021-02-13	Union Health Complex	First Dose	Injection		No			Could not identify	No				No						No
2021-05-11 14:56:44	I Agree	M.M. Shafiuddin	67	Male	Post graduate/Doctoral	Urban	Astrozeneca	India	2021-03-03	Cumilla	First Dose	Injection		No			No	No	No	No	No	Yes	No		No		No	No
2021-05-11 15:05:09	I Agree	Hosneara	43	Female	Post graduate/Doctoral	Urban	Astrageneca	India	2021-03-03	Cumilla	First Dose	Injection		No			No	No	No	No	No	Yes	No		No		No	No
2021-05-11 18:32:57	I Agree	Chaina Roy	53	Female	Graduate	Rural	Astrozeneca	India	2021-02-22	Union health complex	First Dose	Injection	no	No			No	hypertension	2 times antihypertensive	2 times antihypertensive,paracetamol	no	Yes	No		No		No	Yes	Pain at the site of Injection					Yes	1 day
2021-05-11 18:36:29	I Agree	Montosh karmakar	59	Male	Graduate	Rural	Astrozeneca	India	2021-02-23	Shohorawardi Medical College	First Dose	Injection	no	No			No	no	no	no	no	No	No					Yes	Pain at the site of Injection				taking paracetamol	Yes	1 day
2021-05-11 18:52:18	I Agree	Bimala Saha	54	Female	Post graduate/Doctoral	Rural	Astrozeneca	India	2021-02-04	Union health complex	First Dose	Injection	No	No			No	Diabetes, blood pressure, eczema	Antidiabetic, antihypertensive, antiallergenic	Antidiabetic, antihypertensive, antiallergenic		Yes	No		No		No	No
2021-05-11 18:55:57	I Agree	Binoy chandra Saha	64	Male	Graduate	Urban	Astrozeneca	India	2021-02-11	Shoshorawardi medical College	First Dose	Injection		No			No	Heart problem, blood pressure	antihypertensive, Cardioprotective	antihypertensive, Cardioprotective	no	No	No					No
2021-05-11 19:24:30	I Agree	Bidhan Saha	50	Male	Graduate	Urban	Serum Institute	India	2021-04-08	Begumganj	First Dose	Injection	Diabetes report	No			No	Yes.Diabetes, Blood Pressure, Cardiac Disease	No	Paracetamol	Yes, Some specific food	No	No		No			Yes	Pain at the site of Injection, Fever, Body pain	3-4 hours later	No		I had taken paracetamol and a pain killer	Yes	1 day
2021-05-11 20:02:42	I Agree	Tapan saha	62	Male	Post graduate/Doctoral	Urban	Astrozeneca	India	2021-02-18	kuet maitri hall	First Dose	Injection		No			No	Diabetes, bloid pressure	Antidiabetic, antihypertensive	Antidiabetic, antihypertensive	No	No	No					No
2021-05-11 21:51:51	I Agree	Ashik	23	Male	Undergrade	Rural	Astrozeneca	India	2021-02-20	PG hospital	First Dose	Injection		No			Could not identify	No				Yes						Yes	Pain at the site of Injection, Fever, Body pain	After vaccination	No	By taking medicines		Yes	1/2days after vaccination
2021-05-11 21:54:12	I Agree	Ibrahim Khalil	28	Male	Graduate	Urban	Astrozeneca	India	2021-04-24	Union Health Complex	First Dose	Injection		No			No	No				Yes						No
2021-05-11 21:56:02	I Agree	Shahjalal Yamin	21	Male	Undergrade	Rural	Astrozeneca	India	2021-04-11	Unuon Health Complex	First Dose	Injection		No			No	No				Yes						No
2021-05-11 21:59:10	I Agree	Abdul Kader	35	Male	Higher Secondary	Rural	Astrozeneca	India	2021-04-11	Union Health Complex	First Dose	Injection		No			No	Hypertension	Antihypertensive			Yes	No					No
2021-05-11 22:11:39	I Agree	Apu somoddar	49	Male	Graduate	Rural	Astrozeneca	India	2021-03-20	Govt Hospital, jhalakathi	Second Dose	Injection		No			No	No				Yes						No
2021-05-11 22:19:51	I Agree	Anwar Sikdar	53	Male	Graduate	Rural	Astrozeneca	India	2021-03-04	Ashugonj	First Dose	Injection		No			No	no	no	no	no	No	No					No
2021-05-12 02:40:19	I Agree	Zaheda Khatun	61	Female	Higher Secondary	Rural	Serum institute	India	2/28/0021	Narayangonj 300 bed hospital	First Dose	Injection	No	No			Could not identify	Kidney problems, high blood pressure, thyroid hormone deficiency	propranolol hydrochloride, levothyroxine, clonidine hydrochloride, rosuvastatin, amlodipine, valsartan, cholecalciferol	propranolol hydrochloride, levothyroxine, clonidine hydrochloride, rosuvastatin, amlodipine, valsartan, cholecalciferol		Yes	No		No		No	No
2021-05-12 02:44:27	I Agree	Rafiqur Rahman	72	Male	Post graduate/Doctoral	Rural	Serum institute	India	2/28/0021	Narayanganj 300 bed hospital	First Dose	Injection	No	No			Could not identify	diabetes, high blood pressure	Levothyroxine, amlodipine, valsartan, metformin hydrochloride, cholecalciferol, rosuvastatin	Levothyroxine, amlodipine, valsartan, metformin hydrochloride, cholecalciferol, rosuvastatin		Yes	No		No		No	No
2021-05-12 03:47:29	I Agree	Abu Sayeed	56	Male	Graduate	Rural	Serum institute	India	2/17/0021	Narayanganj 300 bed hospital	First Dose	Injection	No	No			Could not identify	diabetes, high blood pressure	Losartan potassium, hydrochlorothiazide, gliclazide	Losartan potassium, hydrochlorothiazide, gliclazide		Yes	No		No		No	No
2021-05-12 03:56:19	I Agree	Farida	45	Female	Undergrade	Rural	Serum institute	India	2/17/0021	Narayanganj 300 bed hospital	First Dose	Injection	No	No			Could not identify	No			Yes, against some food brinjal.	Yes	No		No	No	No	Yes	Pain at the site of Injection, Body pain	Within 12 hours of vaccination	No		On it’s own with time	No	about 1 week
2021-05-12 12:45:39	I Agree	Koushik Roy	22	Male	Graduate	Urban	Astrazeneca-Oxford vaccine	UK	2021-04-18	BSMMU	Second Dose	Injection	Yes	No			No	No	No	No	No	Yes	No					Yes	Pain at the site of Injection	For 2 days after vaccination	No		It subsided of it’s own.	No	For 2 days
2021-05-12 14:43:19	I Agree	Kamrunnahar	41	Female	Graduate	Urban	Astrozeneca	India	2021-02-16	Gazipur	First Dose	Injection		No				No				Yes						No
2021-05-12 14:46:17	I Agree	Mahbub Hossain	50	Male	Graduate	Urban	Astrozeneca	India	2021-02-16	Gazipur	First Dose	Injection		No				Hypertension	Antihypertensive			No						No
2021-05-12 14:51:04	I Agree	Narayan Saha	80	Male	Primary	Rural	Astrozeneca	India	2021-02-22	Union Health Complex	First Dose	Injection		No			Could not identify	Kidney disease, hypertension	Antihypertensive, nephro-protective			No						No
2021-05-12 14:52:59	I Agree	Chabi Saha	56	Female	Primary	Rural	Astrozeneca	India	2021-02-22	Union Health Complex	First Dose	Injection		No			Could not identify	No				No						No
2021-05-12 14:55:21	I Agree	Bashudev Saha	34	Male	Secondary	Rural	Astrozeneca	India	2021-02-28	Union Health Complex	First Dose	Injection		No			Could not identify	Hypertension	Antihypertensive			No						No
2021-05-12 14:58:04	I Agree	Ajit Saha	50	Male	Primary	Rural	Astrozeneca	India	2021-02-13	Union Health Complex	First Dose	Injection		No			No	Hypertension, acidity	Antihypertensive, antacid			No						No
2021-05-12 15:00:15	I Agree	Dipali Saha	35	Female	Primary	Rural	Astrozeneca	India	2021-02-28	Union Health Complex	First Dose	Injection		No			Could not identify	No				Yes						No
2021-05-12 15:01:41	I Agree	Shefali Saha	49	Female	Secondary	Rural	Astrozeneca	India	2021-02-13	Union Health Complex	First Dose	Injection		No			Could not identify	No										No
2021-05-12 15:03:17	I Agree	Nishikanto Saha	56	Male	Secondary	Rural	Astrozeneca	India	2021-03-30	Union Health Complex	First Dose	Injection		No				No				No						No
2021-05-12 15:04:57	I Agree	Paritosh Saha	42	Male	Primary	Rural	Astrozeneca	India	2021-03-28	Union Health Complex	First Dose	Injection		No			No	No				Yes						No
2021-05-12 15:06:59	I Agree	Shandha Saha	30	Female	Secondary	Rural	Astrozeneca	India	2021-02-20	Union Health Complex	First Dose	Injection		No			Could not identify	No				Yes						No
2021-05-12 15:21:06	I Agree	Khaja Tofazzol	55	Male	Post graduate/Doctoral	Urban	Astrozeneca	India	2021-03-05	BSMMU	First Dose	Injection	No	No			No	no	no	no	yes,on eggplant, shrimp	No	No					No
2021-05-12 15:22:50	I Agree	Sharmin Rahman	48	Female	Post graduate/Doctoral	Urban	Astrizeneca	India	2021-03-05	BSMMU	First Dose	Injection		No			No	no	no	no	no	Yes	No		No		No	No
2021-05-13 02:05:03	I Agree	B.P. Saha	76	Male	Graduate	Urban	Astrozeneca	India	2021-04-29	Feni	Second Dose	Injection		No				No			No	No	No		No	No	No	Yes	Fever, Body pain	After Vaccination	No	Taking Medicine		Yes	1 day
2021-05-13 02:10:20	I Agree	Shila Saha	45	Female	Graduate	Rural	Astrazeneca	England	2021-04-29	Feni	Second Dose	Injection	No	No			No	No	No	Paracetamol	No	No	No		No	No	No	Yes	Fever, Body pain	After Vaccination	No		Medicine	Yes	1 day
2021-05-13 15:47:56	I Agree	Arpita Roy	28	Female	Post graduate/Doctoral	Urban	Astrazeneca	India	2021-04-20	Hazaribagh	First Dose	Injection		No			No	No	No	Paracetamol	No	Yes	No		No			Yes	Pain at the site of Injection, Swelling, Fever	Few hours after taking the vaccine	No		It subsided after a day	Yes	1 day
2021-05-13 16:02:36	I Agree	Dr. Akash Deep Adhikari	35	Male	Post graduate/Doctoral	Urban	Astrazeneca	India	2021-04-09	Sheikh Hasina Burn & Plastic Surgery Hospital	First Dose	Injection		No			No	No	Amlodipine, Montelucast, Bilastine	Paracetamol	Dust	Yes	No		No	No	No	Yes	Pain at the site of Injection, Swelling, Fever	After few hours of taking vaccine	No		With time	Yes	1 day
2021-05-13 16:06:13	I Agree	Beauty Adhikari	56	Female	Undergrade	Rural	Astrazeneca	India	2021-04-09	Comilla Sadar Hospital	First Dose	Injection		No			No	Diabetes	Olmesartan, Metoprolol, Insulin	Paracetamol	Dust	Yes	No		No	No	No	No
2021-05-13 19:40:48	I Agree	Gouri Saha	58	Female	Graduate	Urban	Astrozeneca	India	2021-02-23	Jokkha Institute	First Dose	Injection	no	No			No	Blood pressure	Antihypertensive	Antihypertensive	no	Yes	No		No		No	Yes	Fever	The day of vaccination	No		By taking paracetamol	Yes	2 days
2021-05-13 19:44:47	I Agree	Chandan Saha	66	Male	Graduate	Rural	Astrozeneca	India	2021-02-12	jokkha Institute	First Dose	Injection		No			No	no	no	no	no	No	No					No
2021-05-13 20:38:56	I Agree	X	35	Female	Secondary	Rural	Astrozeneca	India	2021-03-17	Kushtia	First Dose	Injection	No	No			No	No	No	Paracetamol	No	No	No		No		No	Yes	Pain at the site of Injection, Vertigo (dizziness), Body pain	After vaccination	No		Automatically	No	About 3 days
2021-05-13 20:39:37	I Agree	Bijoy Chakroborty	50	Male	Undergrade	Rural	Astrozeneca	India	2021-04-25	Zila Sadar Hospital, Jhenaidah	First Dose	Injection	No	No			No	Diabetes		Napa Extra		No	No		No		No	Yes	Pain at the site of Injection, Irritation at the site of Injection	Right after vaccination	No			No	2 days
2021-05-13 20:57:36	I Agree	Aruna Chakroborty	37	Female	Higher Secondary	Rural	Astrozeneca	India	2021-04-25	Zilla Sadar Hospital, Jhenaidah	First Dose	Injection	No	No			No	No		Napa Extra		No	No		No			Yes	Fever, Drowsiness	About 6 hoirs after vaccination	No			Yes	1 day
2021-05-13 21:34:38	I Agree	X	42	Male	Graduate	Urban	serum Institute,	india	2021-03-03	gaibandha	First Dose	Injection	No	No			No	no	no	no	no	Yes	No					No
2021-05-13 21:36:59	I Agree	Y	33	Female	Graduate	Urban	Serum Institute	India	2021-03-08	Gobindaganj	First Dose	Injection	no	No			No	Diabetes	Antidiabetics	antidiabetics	no	Yes	No		No		No	No
2021-05-13 21:41:46	I Agree	Aparna Roy	49	Female	Graduate	Urban	Astrozeneca	India	2021-02-15	Magura Sadar Hospital	First Dose	Injection		No			Could not identify	Diabetes	Antidiabetic, metformin	Antidiabetic, metformin		Yes						Yes	Fever	After vaccination	No		By medicine	Yes	Approximately 1day after vaccination
2021-05-13 21:42:11	I Agree	Joly Chakraborty	56	Female	Undergrade	Urban	Astrozeneca	India	2021-03-15	Mohammadpur Fertility Center	First Dose	Injection		No			No	Knee Pain		Yes. Napa Extra	No	No	No		No		No	Yes	Pain at the site of Injection		No			Yes	2 days
2021-05-13 21:43:01	I Agree	Mrigen Chowdhury	33	Male	Graduate	Urban	Astrozeneca	India	2021-02-15	Magura Sadar Hospital	First Dose	Injection		No			No	No										No
2021-05-14 07:46:44	I Agree	Shandhya rani halder	42	Female	Higher Secondary	Rural	Serum Institute	India	2021-02-08	Morrelganj upozila health complex	First Dose	Injection	No	No			No	Yes. (Rheumatic arthritis)	Yes. (Rheumatic arthritis medication)	Yes. (Rheumatic arthritis medication)	Yes. Against any kind of allergen Such as vegetable, milk,egg etc.	Yes	No		No			No
2021-05-14 08:02:53	I Agree	Nilkanto mandal	47	Male	Graduate	Urban	Serum Institute	India	2021-02-08	Morelganj upazila health complex	First Dose	Injection	No	No			No	Yes( Hypertension)	Yes (antihypertensive medicine)	Yes (antihypertensive medicine)		Yes	No					No
2021-05-14 13:36:38	I Agree	Nitai Saha	58	Male	Graduate	Rural	Astrozeneca	India	2021-03-30	Bhurungamari Govt Hospital	Second Dose	Injection		No			No	Yes, Diabetes	Metformim			Yes	No					No
2021-05-14 13:39:48	I Agree	Jhanardhan Saha	75	Male	Graduate	Rural	Astrozeneca	India	2021-05-30	Bhurungamari Govt hospital	Second Dose	Injection		No			No	No				Yes	No					No
2021-05-14 13:41:18	I Agree	Monten Saha	32	Male	Post graduate/Doctoral	Rural	Astrozeneca	India	2021-05-30	Bhurungamari Govt hospital	Second Dose	Injection		No			No	No				No	No					No
2021-05-14 13:43:15	I Agree	Laxman Saha	41	Male	Higher Secondary	Rural	Astrozeneca	India	2021-04-02	Bhurungamari Govt hospital	First Dose	Injection		No			No	No				No	No					No
2021-05-14 13:44:46	I Agree	Ram Saha	59	Male	Higher Secondary	Rural	Astrozeneca	India	2021-03-27	Bhurungamari Govt hospital	Second Dose	Injection		No			No	No				No	No					No
2021-05-14 13:46:32	I Agree	Shilpi Saha	40	Female	Higher Secondary	Rural	Astrozeneca	India	2021-03-21	Bhurungamari Govt hospital	Second Dose	Injection		No			No	No				No	No		No		No	No
2021-05-14 13:53:21	I Agree	Mahadev Saha	30	Male	Post graduate/Doctoral	Rural	Astrozeneca	India	2021-03-31	Bhurungamari Govt hospital	Second Dose	Injection		No			No	No				No	No					No
2021-05-14 19:48:26	I Agree	X	65	Male	Secondary	Rural	Astrozeneca	India	2021-02-27	Savar Govt Hospital	First Dose	Injection	no	No			No	blood pressure, asthma	Antihypertensive, antiasthmatic	antihypertensive, antiasthmatic,paracetamol	Dust Allergy	No	No					No
2021-05-14 19:52:07	I Agree	Y	67	Female	Primary	Rural	Astrizeneca	India	2021-02-27	Savar Govt hospital	First Dose	Injection		No			No	Blood pressure, diabetes	antihypertensive, antidiabetic	Antihypertensive, antihypertensive	no	Yes	No					Yes	Pain at the site of Injection, Fever	The day of vaccination	No		by taking paracetamol	Yes	2-3 days
2021-05-14 19:55:34	I Agree	X	43	Male	Higher Secondary	Rural	Astrozeneca	india	2021-02-27	Savar Govt hospital	First Dose	Injection		No			No	blood pressure, cholesterol, piles	Antihypertensive, medicines for cholesterol and piles	Antihypertensive, medicines for cholesterol and piles	Dust Allergy	No	No					No
2021-05-14 19:58:27	I Agree	Y	38	Female	Higher Secondary	Rural	Astrozebeca	India	2021-02-27	Narayanganj Government Hospital	First Dose	Injection		No			No	Thiroid,	medicine for thyroid	medicine for thyroid	dust Allergy	Yes	No					Yes	Pain at the site of Injection, Fever	the day of vaccination	No		by taking paracetamol	Yes	2-3 dayz
2021-05-14 20:00:15	I Agree	Z	52	Male	Graduate	Rural	Astrozrneca	India	2021-02-27	Narayanganj government hospital	First Dose	Injection		No			No	High Cholesterol	medicine for high cholesterol	medicine for high cholesterol	no	No	No					No
2021-05-14 23:37:14	I Agree	Maisha Chowdhury	24	Female	Undergrade	Rural	Astrozeneca	India	2021-02-13	Cumilla	First Dose	Injection	that the patient might suffer from fever	No			No	no	no	yes, Regular medicine like antidiabetic, antihypertensive egula	dust allergy	Yes	No		No	No	No	Yes	Fever, Body pain		No		paracetamol	Yes
2021-05-16 08:12:51	I Agree	Syed khairul alam	40	Male	Graduate	Urban	Astrozeneca	India	2021-03-03	Upazila Health complex, Jamurki	First Dose	Injection	No	No			No	No		No	No	No	No					No			No			No
2021-05-16 09:06:37	I Agree	Sultana	48	Female	Graduate	Urban	Serum Institute	India	2021-08-02	Bangabandhu Sheikh Mujib Medical University	Second Dose	Injection		No			No	Yes,hypertension	No	No	No	Yes	Yes	No	No	No	No	No			No
2021-05-16 09:26:16	I Agree	Selim	33	Male	Graduate	Urban	Serum Institute	India	2021-07-02	Bangabandhu Sheikh Mujib Medical University	Second Dose	Injection		No			No	Yes	Stemetil	Stemetil		Yes	No		No	No	No	No
2021-05-16 12:17:33	I Agree	Shamsul Alam	46	Male	Graduate	Rural	Serum Institute India	India	2021-05-03	Burichong health complex	First Dose	Injection	Take paracetamol if you feel intolerable pain or fever	No			No	Heart disease, diabetes	Antihypertensive,antidiabetic	Paracetamol	No	Yes	No					Yes	Pain at the site of Injection, Fever, Body pain	6-7 hours after vaccination	No		Through medicines	Yes	1-2days
2021-05-16 12:23:45	I Agree	Farida Alam	55	Female	Graduate	Rural	Serum Institute India	India	2021-05-03	Burichong Health Complex	First Dose	Injection	Take paracetamol if you feel severe pain or fever	No			Yes	Diabetes		Paracetamol	No	Yes	No		No		No	Yes	Pain at the site of Injection, Swelling, Fever, Nausea, Body pain	Within 2-3 hours of vaccination	No		Through medicines	Yes	7-8 days
2021-05-16 12:32:32	I Agree	X	74	Male	Graduate	Rural	Astrozeneca	India	2021-04-18	Narsingdi	First Dose	Injection	No	No			No	Hypertension	Antihypertensive	Antihypertensive	No	Yes	No					Yes	Pain at the site of Injection, Fever	the day of vaccination	No		By taking medicine	Yes	2 days
2021-05-16 12:34:54	I Agree	Y	49	Female	Undergrade	Rural	Astrozeneca	India	2021-04-21	Narsingdi	First Dose	Injection	No	No			No	Hypotension				Yes	No	no	No		No	No
2021-05-16 12:41:35	I Agree	XY	34	Male	Graduate	Urban	Serum Institute, India	India	2021-04-21	Tangail	First Dose	Injection		No				Cardiac, hypertension	atova, surgel, ecosprin, osartil	Same		Yes	No					Yes	Pain at the site of Injection	After vaccination	No		Subsided naturally	No	2/1 days
2021-05-16 12:44:51	I Agree	Rabeya Khatun	57	Female	Higher Secondary	Urban	Astrozeneca	India	2021-04-21	Tangail Medical College	First Dose	Injection		No			Could not identify	No			No	Yes	No					Yes	Body pain	After vaccination	No		Napa extra	Yes	2 days after vaccination
2021-05-16 19:31:21	I Agree	Zx	39	Male	Post graduate/Doctoral	Urban	Astrozeneca	India	2021-04-17	Gazipur Sadar Hospital	First Dose	Injection		No			Could not identify	Hypertension, Joint pain	Antihypertensive, homeopathy for pain		No	No	No					Yes	Drowsiness	After vaccination	No		Subsided naturally	No	5-10 minutes after vaccination
2021-05-16 19:34:18	I Agree	Sabina Aktar	30	Female	Undergrade	Urban	Astrozeneca	India	2021-04-17	Gazipur Sadar Hospital	First Dose	Injection		No			Could not identify	Hypertension	Antihypertensive		No	Yes	No					No
2021-05-16 19:38:33	I Agree	Moni Saha	41	Female	Graduate	Urban	Astrozeneca	India	2021-02-21	Mirzapur	First Dose	Injection		No			Could not identify	Diabetes, joint pain, eczema	Eczema, anti diabetic			No	No					Yes	Fever	After vaccination	No		By medicine	Yes	1/2 days
2021-05-16 20:45:14	I Agree	Asif	53	Male	Graduate	Rural	Astrozeneca	India	2021-02-20	Mirzapur sadar hospital	First Dose	Injection		No			Could not identify	No			No	No	No					No
2021-05-16 20:47:43	I Agree	Komola Saha	35	Female	Graduate	Rural	Astrozeneca	India	2021-02-20	Union Health Complex	First Dose	Injection		No			No	Diabetes, hypertension, fracture	Antidiabetic, antihypertensive, mineral			Yes	No					No
2021-05-16 20:51:12	I Agree	kombhukantha saha	72	Male	Post graduate/Doctoral	Rural	Astrozeneca	India	2021-02-20	Union Health Complex	First Dose	Injection		No			Could not identify	Hypertension	Antihypertensive	Same								No
2021-05-16 20:56:18	I Agree	Bahar	21	Male	Graduate	Rural	Astrozeneca	India	2021-04-16	Gopalganj	First Dose	Injection		No			No	No			No	Yes	No					Yes	Pain at the site of Injection, Swelling, Fever	After vaccination	No		By medicine	Yes	1/2 days after vaccination
2021-05-16 21:06:37	I Agree	Tithi Paul	28	Female	Undergrade	Urban	Serum	India	2021-03-18	Jhalokathi	Second Dose	Injection		No			No	No	No	Napa extra	No	No	No		No	No	No	Yes	Pain at the site of Injection, Body pain		No			Yes	2 days
2021-05-17 11:10:33	I Agree	Sunondita Saha	41	Female	Graduate	Urban	Astrozeneca	India	2021-02-25	Tangail medical College hospital	First Dose	Injection	No	No			No	No	no	no	no	Yes	No		No		No	No
2021-05-17 11:14:09	I Agree	Jibon Saha	33	Male	Graduate	Urban	Astrozeneca	India	2021-02-25	Tangail medical College hospital	First Dose	Injection	no	No			No	Blood pressure, heart problem, Prostate problem	Antihypertensive, Cardioprotective, medicine for Prostate	Antihypertensive, Cardioprotective, medicine for Prostate	no	No	No					No
2021-05-18 14:10:28	I Agree	Mukta Datta	49	Female	Graduate	Urban	Astrozeneca	India	2021-02-04	Tangail medical College hospital	First Dose	Injection	No	No			No	no	no	no	no	Yes	No					No
2021-05-18 23:33:43	I Agree	Abdur Razzak	50	Male	Higher Secondary	Urban	Astrozeneca	India	2021-02-26	Voirob	First Dose	Injection		No			No	Diabetes	Antidiabetic	Antidiabetic	No	Yes	No					Yes	Fever, Decreased appetite, Body pain	After vaccination	No		By medicine	Yes	2/3 days after vaccination
2021-05-19 09:53:50	I Agree	Paritosh Ghosh	73	Male	Post graduate/Doctoral	Urban	Serum Institute	India	2021-05-28	Central police hospital	First Dose	Injection		Yes	No	No	No	Diabetic	No	No	No	No	No	No				No			No			No
2021-05-19 11:46:20	I Agree	Gita Dey	47	Female	Secondary	Urban	Astrozeneca	India	2021-03-01	Union health complex	First Dose	Injection		No			No	Blood pressure, heart problem	Antihypertensive, Cardioprotective	Antihypertensive, Cardioprotective	no	Yes	No					No
2021-05-19 11:49:23	I Agree	Suchanda Saha	42	Female	Secondary	Urban	Astrozeneca	India	2021-02-24	Union health complex	First Dose	Injection		No			No	High cholesterol, blood pressure	antihypertensive, Cardioprotective	antihypertensive, Cardioprotective	no	Yes	No					No
2021-05-19 11:51:28	I Agree	Mukul Saha	53	Male	Secondary	Urban	Astrozeneca	India	2021-02-24	Union health complex	First Dose	Injection		No			No	no	no	no	no	No						No
2021-05-19 11:54:45	I Agree	Ratna Saha	35	Female	Secondary	Urban	Astrozeneca	India	2021-03-24	Union health complex	First Dose	Injection		No			No	Insomnia	tranquilizer	Tranquilizer	no	No	No					No
2021-05-19 11:57:44	I Agree	Arun Saha	56	Male	Secondary	Urban	Astrozeneca	India	2021-03-07	Union health complex	First Dose	Injection		No			No	No	no	no	no	No	No					No
2021-05-19 14:22:35	I Agree	Mamun	60	Male	Graduate	Rural	Astrozeneca	India	2021-02-20	Jhalakathi Govt Hospital	First Dose	Injection		No			No	No				Yes	No					Yes	Fever	After vaccination	No		Subsided naturally	No	1day after vaccination
2021-05-19 14:26:04	I Agree	Noyon	39	Male	Graduate	Rural	Astrozeneca	India	2021-02-22	Jhalakathi Govt hospital	First Dose	Injection		No			No	Diabetes	Antidiabetic	Antidiabetic	No	Yes	No					Yes	Fever, Body pain	After vaccination	No		Subsided naturally	No	1 day after vaccination
2021-05-19 14:30:19	I Agree	Sheikh Monir	57	Male	Graduate	Rural	Astrozeneca	India	2021-02-21	Jhalakathi Govt hospital	First Dose	Injection		No			No	No			No	Yes	No					No
2021-05-19 18:02:46	I Agree	Runu Saha	45	Female	Secondary	Urban	Astrozeneca	India	2021-04-04	Union health complex	First Dose	Injection		No			No	no	no	no	no	Yes	No					No
2021-05-19 18:07:10	I Agree	Sodanondo Karmakar	33	Male	Higher Secondary	Urban	Astrozeneca	India	2021-02-27	Union health complex	First Dose	Injection		No			No	no	no	no	no	No	No					No
2021-05-19 18:57:22	I Agree	XY	59	Male	Post graduate/Doctoral	Urban	Astrozeneca	India	2021-02-13	Shahrawardi Medical Hospital	First Dose	Injection		No			No	No				No	No					No
2021-05-19 18:59:50	I Agree	Selina Begum	46	Female	Post graduate/Doctoral	Urban	Astrozeneca	India	2021-02-11	Mohammadpur Fertility Center	First Dose	Injection		No			No	No										No
2021-05-19 20:47:57	I Agree	Uma das	28	Female	Post graduate/Doctoral	Urban	Serum institute	India	2021-04-08	Cumilla sadar hospital	Second Dose	Injection	No	No			No	No	No	No	No	No	No		No		No	Yes	Pain at the site of Injection, Fever	In 1st dose of vaccine, the day after vaccine.	No		It stays just for one day	No	Just one day.
2021-05-19 20:55:20	I Agree	Tapan kumar das	72	Male	Higher Secondary	Urban	Serum institute	India	2021-04-24	Cumilla city corporation	Second Dose	Injection	No.	No			No	Diabetes, heart disease	Lopiral plus etc		No	No	No	No				No
2021-05-19 20:59:32	I Agree	Tulshi rani das	60	Female	Secondary	Urban	Serum institute	India	2021-04-24	Cumilla city corporation	Second Dose	Injection	No	No			No	Arthritis	Salazine		Yes	No	No		No	No	No	No
2021-05-19 23:32:15	I Agree	Shahidul Islam	31	Male	Higher Secondary	Rural	Astrozeneca	India	2021-05-18	Jhalakathi	First Dose	Injection		No			No	Heart disease, eye disease	Cardioprotective		No	Yes	No					Yes	Body pain	After vaccination	No		Subsided naturally	No	1day after vaccination
2021-05-20 10:01:24	I Agree	Shudipto Biswash	23	Male	Undergrade	Rural	Astrozeneca	India	2021-02-22	Magura Sadar Hospital	First Dose	Injection		No			Could not identify	No			Yes, dust allergy	Yes	No					No
2021-05-20 10:05:42	I Agree	Shonjit Dash	49	Male	Graduate	Urban	Astrozeneca	India	2021-02-13	Union Health Complex	First Dose	Injection		No			No	Hypertension, diabetes	Antihypertensive, antidiabetic	Same	No	Yes	No					No
2021-05-20 10:09:17	I Agree	Wazed Ali	32	Male	Graduate	Urban	Astrozeneca	India	2021-03-08	Tangail Medical College Hospital	First Dose	Injection		No		No	Could not identify	No	No		No	No	No					No
2021-05-20 10:11:27	I Agree	Rashida Akter	47	Female	Graduate	Urban	Astrozeneca	India	2021-02-14	Tangail medical College hospital	First Dose	Injection		No				No				Yes	No					No
2021-05-20 10:14:38	I Agree	Jesmin Aktar	56	Female	Post graduate/Doctoral	Urban	Astrozeneca	India	2021-02-17	Union Health Complex	First Dose	Injection		No			Could not identify	No			No	Yes	No					Yes	Nausea, Vertigo (dizziness)	After vaccination	No		Subsided naturally	No	1 day after vaccination
2021-05-20 10:17:51	I Agree	Deepa	29	Female	Graduate	Urban	Astrozeneca	India	2021-02-17	Union Health Complex	First Dose	Injection		No			Could not identify	No			No	Yes	No					Yes	Itching, Fever, Anaphylaxis, Body pain	After vaccination	No		Subsided naturally	No	1 day after vaccination
2021-05-20 11:43:51	I Agree	Amir Hossain	57	Male	Higher Secondary	Rural	Astrozeneca	India	2021-04-17	Jhalakathi Sadar Hospital	First Dose	Injection		No			No	No			No	Yes	No					Yes	Vertigo (dizziness), Body pain	After vaccination	No		Took nebulizer instantly	Yes	Several hours after vaccination
2021-05-21 11:43:59	I Agree	Golapi Karmakar	39	Female	Primary	Urban	Astrozeneca	India	2021-03-02	Union health complex	First Dose	Injection		No				Hypertension	Antihypertensive		Yes	Yes	No					No
2021-05-21 11:46:02	I Agree	Sreedam Karmakar	71	Male	Primary	Urban	Astrozeneca	India	2021-03-02	Union Health Complex	First Dose	Injection		No			No	UTI, hypertension	Antihypertensive, medicine for UTI	Same	No	No	No					No
2021-05-21 20:48:16	I Agree	Biplob Katuria	41	Male	Graduate	Urban	AstraZeneca	India	2021-03-15	Dhaka	First Dose	Injection		No				No	No									Yes	Vertigo (dizziness), Body pain
2021-05-21 20:52:42	I Agree	Nadia Hossain	20	Female	Graduate	Urban	AstraZeneca	India	2021-05-19	Dhaka	First Dose	Injection		No		Ni	No	No		Napa		No						Yes	Pain at the site of Injection, Body pain						1 day
2021-05-21 20:57:14	I Agree	Khusi Shelly	48	Female	Post graduate/Doctoral	Urban	AstraZeneca	India	2021-03-14	Chittagong	First Dose	Injection		No		No		No										Yes	Fever, Body pain	After vaccination	No		Napa Extend	Yes	2 days
2021-05-21 21:00:04	I Agree	Akhtaruzzaman Hasan	56	Male	Post graduate/Doctoral	Urban	AstraZeneca	India	2021-04-15	Dhaka	First Dose	Injection		No				No										Yes	Vertigo (dizziness), Body pain		No				3 days
2021-05-22 00:22:45	I Agree	Snigdha	28	Female	Graduate	Urban	Serum	India	2021-04-22	BSMMU	First Dose	Injection	No	Yes	Ivermectin, Azithromycin, Doxicycline, Vitamins, Rivaroxaben, Cod liver oil	No		No	No	No	Dust	Yes	No		No			Yes	Pain at the site of Injection, Fever, Drowsiness, Body pain
2021-05-22 00:57:13	I Agree	Sharmin Israt Khan	49	Female	Post graduate/Doctoral	Urban	Serum Institute	India	2021-02-18	Azimpur	First Dose	Injection		No			No	No				Yes	No		No		No	Yes	Fever, Vertigo (dizziness), Body pain	10-12 hours after the vaccination	No	Took Paracetamol		Yes	1 day
2021-05-22 11:32:23	I Agree	Bobita	37	Female	Higher Secondary	Urban	Astrozeneca	India	2021-03-18	Tangail Medical College	First Dose	Injection		No			No	Diabetes, hypertension	Antihypertensive, antidiabetic	Same	Yes	Yes	No					No
2021-05-22 11:34:34	I Agree	Pobon Chowdhury	25	Male	Graduate	Urban	Astrozeneca	India	2021-03-18	Tangail Medical College	First Dose	Injection		No			No	Hypertension and Diabetes	Antihypertensive, antidiabetic		No	No	No					No
2021-05-22 18:22:54	I Agree	Md. Ismail Hossain	30	Male	Graduate	Urban	Astrozeneca	India	2021-02-21	Chatkhil Upazilla Health Complex	Second Dose	Injection		No			Yes	No				No	No		No			Yes	Pain at the site of Injection, Fever, Drowsiness, Body pain	The day I vaccinated	No		Automatic	No
2021-05-22 20:35:42	I Agree	Halima Akter	21	Female	Post graduate/Doctoral	Urban	Serum Institute of India	India	2021-10-03	Dhaka CMH	Second Dose	Injection	No	No	NA	NA	No	NO	Yes, Montelukast	Yes, Montelukast	Yes, against UV rays and different types algae	Yes	No	NA	No		No	yes	Pain at the site of Injection, Fever, Drowsiness	Around 12 hours later	No	NA	Automatically, just 1-2 days later	No	1-2 days
2021-05-22 20:37:14	I Agree	Taniya	43	Female	Graduate	Urban	Serum Institute of India	India	2021-03-10	Dhaka Medical College & Hospital	First Dose	Injection	To sit for 30minutes for observation of any oossible side-effects	No			No	N/A		Paracetamol to alleviate pain	Food & dust allergy	Yes	No		No		No	Yes	Pain at the site of Injection, Irritation at the site of Injection, Swelling, Fever	One day after vaccination	No		Taking NSAIDs helped to alleviate pain & fever	Yes	One day only
2021-05-23 03:50:58	I Agree	Maimuna Zahed Shaon	17	Female	Higher Secondary	Urban	Serum Institute	India	2021-02-20	Dhaka mohanogor shishu hospital,lalbagh	First Dose	Injection	No	No			Yes	No				Yes	No		No		No	No
2021-05-23 14:21:55	I Agree	Prodip Karmakar	54	Male	Secondary	Rural	Astrozeneca	India	2021-02-10	Union health complex	First Dose	Injection	No	No			No	Blood pressure	antihypertensive	antihypertensive	No	No	No					No
2021-05-23 14:25:49	I Agree	Basona Roy	39	Female	Graduate	Rural	Astrozeneca	India	2021-02-10	Union health complex	First Dose	Injection	no	No			No	no	no	no	no	Yes	No					No
2021-05-27 11:39:47	I Agree	Anika Tabassum	41	Female	Post graduate/Doctoral	Urban	Astrozeneca	India	2021-02-25	Khanpur Hospital, Narayanganj	First Dose	Injection		No			No	Dust and cold Allergy	Antihistamines	Antihistamines	Yes	Yes	No					Yes	Body pain				Subsided naturally	No	3 days after vaccination
2021-05-28 22:28:46	I Agree	Abdullah Al Mamun	37	Male	Undergrade	Foreign	Pfizer	USA	2021-05-16	Education Bureau, Kowloon Tong	First Dose	Injection	Provide leaflet that contains about vaccine and its side effects.	No			No	No				Yes	No	Pain at the site of injection as well as full body for 2 days after vaccination				Yes	Pain at the site of Injection, Fever, Drowsiness, Body pain	following day of vaccination	No		just take rest and normally after 2 days feel better	No	2 days after vaccination	No
2021-05-28 22:48:04	I Agree	Md. Shah Amran	58	Male	Post graduate/Doctoral	Urban	Astrazeneca-SII	INDIA	2021-05-27	BSMMU	First Dose	Injection	After vaccination, wait for 30 min	Yes	Paracetamol, antibiotics, antihistamine, blood thinner etc.	No.	No	No.	Antihypertensive, ppi	No.	No.	Yes	No					Yes	Pain at the site of Injection, Irritation at the site of Injection, Swelling, Itching	Nothing.	No			No		Yes
2021-05-29 00:16:56	I Agree	Md. Shah Amran	42	Male	Post graduate/Doctoral	Urban	Astrazeneca-SII	India	2021-12-02	BSMMU	First Dose	Injection	Wait for 30 min. If any problem consult witha doctor.	No			No	No.	Antihypertensive (Abecab, 8/20mg)	Paracetamol, 500 mg	No.	Yes	No					Yes	Pain at the site of Injection, Irritation at the site of Injection, Swelling, Itching, Fever, heavy head	after 12h of vaccination	No	By taking drugs		Yes	3/4days	Yes
2021-05-29 12:58:42	I Agree	Queen Akter	33	Female	Secondary	Urban	AstraZeneca	India	2021-03-03	Mohammad ali hospital bogura	Second Dose	Injection	None	No			No	No	No	Yes	No	No	No		No	No	No	Yes	Fever		No			No		No
2021-05-29 13:37:39	I Agree	Tapan Krishna Saha	58	Male	Post graduate/Doctoral	Urban	Serum	India	2021-02-11	NICVD	Second Dose	Injection	No	Yes	Ivermectin,Doxycycline, Azythromycin? Fexofenadin, Montilucast Vitamin D, Zinc	No		Hypertension			No		No					Yes	Pain at the site of Injection							No
2021-05-29 13:42:52	I Agree	Rezaur Rahman	35	Male	Post graduate/Doctoral	Urban	Serum Institute	India	2021-02-22	Unity Through Population Services, Sector-6, Uttara	First Dose	Injection	None	No	N/A	N/A	Could not identify	No	No	Paracetamol	No	Yes	No	N/A				Yes	Pain at the site of Injection, Irritation at the site of Injection, Itching, Fever, Body pain	After 18-20 hours	No	Taking plain paracetamol		Yes	2 days	No
2021-05-29 14:22:08	I Agree	Md. Shafiqul Islam Talukder	41	Male	Post graduate/Doctoral	Urban	Serum institute	India	2021-05-18	Dhaka	Second Dose	Injection		No			No	Allergy	Fexofenadine	Paracetamol and Fexofinadine		No	No					Maybe								Yes
2021-05-29 14:22:26	I Agree	Mihir Ranjan Sarker	40	Male	Post graduate/Doctoral	Urban	Oxford	America	2021-05-08	Dhaka Medical College Hospital	Second Dose	Injection		No			Could not identify	No	No	No	No	Yes	No	No				Yes	Pain at the site of Injection, Body pain	1st day	No	As usual		No	One day.	No
2021-05-29 14:30:19	I Agree	MD HAZRAT ALI	56	Male	Post graduate/Doctoral	Urban	Serum Institute	India	2021-02-14	ENT Hospital, Tejgaon, Dhaka	First Dose	Injection	Asked me to wait 30 minutes @ vaccination center after vaccination & to inform them for any adverse effects	No			No	No	No	No	No	No	No		No			No								No
2021-05-29 14:44:43	I Agree	Md.jakir Hussain	23	Male	Graduate	Urban	AstraZeneca	UK	2021-02-20	Nagar matrisadan,narimaitri,34mogbazar	Second Dose	Injection	No	No	No	No	Could not identify	No	No	No	No	No	No	No	No	No	No	yes	Weakness	No	No	No	No	No	No	No
2021-05-29 14:51:57	I Agree	Mohammad Ismail Hossain	38	Male	Post graduate/Doctoral	Urban	Seram Institute, India	India	2021-05-16	Mugdha Medical College Hospital, Dhaka	Second Dose	Injection	After incubated Ist dose on 18 March, I got infected with covid 19 on 3rd April and tested Negative 23 April with almost asymtoatic with mild coughing for 2/3 days.Surprigingly none of my family member tested positive.i	No			No	Open Heart surgery &Rheumatoid Arthritis	Tab Warin 5mg 2.Tofanib 5mg 3.Tab Maxpro	Medicine that I take regularly	Not confirmed	Yes	No		No			yes	Body pain	After Ist dose.Mild pain in the body	No		Taking paracetamol	Yes	2 days	Yes
2021-05-29 14:59:59	I Agree	Nusrat Jahan nitu	21	Female	Undergrade	Urban	Astrozeneca	India	2021-03-04	Koshaituli matrishodon	Second Dose	Injection	No	No			No	No	No	Napa500mg	No	No	No	Nothing	No	No	No	Yes	Pain at the site of Injection, Body pain		No		Nothing	No		No
2021-05-29 15:00:46	I Agree	Mosammat Afrina Hasan	50	Female	Higher Secondary	Urban	Covid sheild	India	2021-05-05	Dhaka medical college	Second Dose	Injection	To take rest and eat plenty of water, healthy foods	No	No	No	No	No	No	Yes,Napa extra	Yes,dust allergi	No	No	No	No	No	No	Yes	Pain at the site of Injection, Irritation at the site of Injection	After one day	No			Yes	Just 1 day	No
2021-05-29 15:00:49	I Agree	Dr.Ziaul Abedin	83	Male	Post graduate/Doctoral	Urban	Astrogenekar Oxford	India	2021-03-03	Cox's bazar	Second Dose	Injection	May be use for research	No	NA	NA	No	None	None	None	None	Yes	No	NA				No								No
2021-05-29 15:38:53	I Agree	Mst.Meherunnesa	26	Female	Undergrade	Rural	Astrozeneca	India	2021-02-20	Bera,pabna	First Dose	Injection	No	No		No	No	Fever	No	No	No	Yes	No	No	No	No	No	Yes	Fever, Body pain							No
2021-05-29 16:08:53	I Agree	Fahima Aktar	49	Female	Graduate	Urban	Astrazeneca	Serum institute, india	2021-03-29	BSBBU	First Dose	Injection	No	No			No	No	Antibiotic	No	No	No	No		No		No	No								No
2021-05-29 16:16:09	I Agree	Abdul Jalil	32	Male	Graduate	Urban	Oxford–AstraZeneca	India	2021-04-11	Upazila Health complex, Nawabganj	Second Dose	Injection		No			No	Diabetes, High Blood Pressure			Jock itch	No	No					No								No
2021-05-29 16:30:04	I Agree	Chayankumardas	51	Male	Graduate	Urban	Oxford & Astrazeneca	India	2021-04-15	Shahid Ahsanullah govt.hospital	Second Dose	Injection		No				No	No	No	No	No	No	No	No	No	No	No								No
2021-05-29 18:31:48	I Agree	S M MAHFUZUR RAHMAN	48	Male	Post graduate/Doctoral	Urban	AstraZeneca	India	2021-02-16	Shishu Hospital, Shamoli, Dhaka	Second Dose	Injection	Requested to stay 15 minutes after vaccination for observation	No			No	No	Anti Diabetic and anti hypertensive	Anti Diabetic and anti hypertensive		No	Yes	No	No	No	No	No		After one month of vaccination	No		I was admitted to hospital for treatment. Doctors gave me several antibiotics, steroids and actimra infection along with other medication too	Yes	About 17 days	Yes
2021-05-29 18:51:05	I Agree	RA Hasnat	29	Male	Post graduate/Doctoral	Rural	SII (The Serum Institute)	India	2021-02-14	ENT Hospital	Second Dose	Injection	No	No			Yes	No		Paracetamol	No	No	No		No	No	No	Yes	Pain at the site of Injection, Irritation at the site of Injection, Itching, Fever, Body pain	After 12-16 hrs	No			No	1-2 days	No
2021-05-29 19:44:53	I Agree	Md. Abu Jar Gifari	25	Male	Graduate	Urban	covishield	india	2021-04-24	National Institute of Cardiovascular Diseases	First Dose	Injection	Wait 30 mins	No	no	no	No	no	no	paracetamol	yes, food	No	No	no	No	No	No	Yes	Pain at the site of Injection, Fever, Body pain		No			No	1 day	No
2021-05-29 20:24:13	I Agree	A R M RUHUL AMIN	41	Male	Post graduate/Doctoral	Rural	Moderna	United States	2020-12-30	Marshall Health	First Dose	Injection	Wait for 15 minutes at the center	No			No	No		No	No	No	No		No			Yes	Pain at the site of Injection	After few hours	No		Normally	No	1 day	No
2021-05-30 00:17:50	I Agree	Dr. Monjur Shoyeb Khan	20	Male	Graduate	Urban	Oxford-Astrazeneca	USA-UK	2021-02-12	Sheikh Hasina National Institute of Burn & Plastic Surgery	Second Dose	Injection		No			No	no	no	no	no	Yes	No		No		No	No								No
2021-05-30 00:21:52	I Agree	Sefali Begum	45	Female	Primary	Urban	Oxford-Astrazeneca	USA-UK	2021-04-20	Pangsha Upazila Health Complex	Second Dose	Injection		No			No	High blood pressure	Bizoran	Bizoran	no	Yes	No		No	No	No	No								No
2021-05-30 00:21:58	I Agree	Umme Sadia JAYNOB	37	Female	Post graduate/Doctoral	Urban	Serum institute	India	2021-09-02	BSMMU	First Dose	Injection		No			Could not identify	No	No	Paracetamol 500mg, fexofenadin 120mg	No	No	No	N/A	No	No	No	Yes	Pain at the site of Injection	2nd day	No	N/A	Naturally	No	4/5/days	No
2021-05-30 09:45:09	I Agree	Md Sajjatul islam	27	Male	Undergrade	Rural	Astrozeneca	Abu Dhabi	2021-03-21	Dubai	Second Dose	Injection	He was suffering with Fever, headache	No			No	Yes, diabetes, blood pressure,Allergy	No	Yes, paracetamol tablets	Yes	Yes	No	Suffering with fever, headache, some Allergy	No	No	No	Yes	Fever, Body pain, Allergy, diarrhoea	After the vaccination he suffering with Fever, diarrhoea and some Allergy problems was start	No		Taking paracetamol, amodris tablet	Yes	3-4 day	No
2021-05-30 12:04:43	I Agree	Farida yeasmin	45	Female	Graduate	Urban	Serum institute	India	2021-04-12	Savar cantonment	Second Dose	Injection	No	No			No	Diabetes, arthritis	Yes, diabetic and arthritis medications	Yes, diabetic and arthritis medications	No	No	No		No		No	Yes	Pain at the site of Injection, Fever	1 day after vaccination	No		Within a week pain and dizziness was gone	No	1 week	No
2021-05-30 12:14:18	I Agree	Md. Abdur Rahim	50	Male	Graduate	Urban	Serum institute	India	2021-05-20	Savar Cantonment	Second Dose	Injection		No			Yes	No	Antibiotics, antihistamines, paracetamol	No	No	No	No		No			Yes	Pain at the site of Injection, Irritation at the site of Injection, Swelling, Fever, Body pain	During vaccination	No		Automatically	No	3 days	No
2021-05-30 17:22:30	I Agree	Md. Ibrahim	58	Male	Graduate	Urban	Covishield	India	2021-10-02	BSMMU	First Dose	Injection		No			Could not identify	No	No	No	No	No	No	No				Yes	Pain at the site of Injection, Body pain		No			No		No
2021-05-30 17:49:58	I Agree	Sanzana Rivu	25	Female	Graduate	Foreign	Pfizer	USA	2021-03-21	Philadelphia convention center	Second Dose	Injection		No			No	No	No	Acetaminophen	No	Yes	Yes	No	No			Yes	Pain at the site of Injection	Few hours after	No		Gradually after few days		2-3 days	No
2021-05-30 20:32:40	I Agree	Urmila Saha	37	Female	Secondary	Rural	Astrazeneca	India	2021-02-27	Narshingdi Sadar hospital	First Dose	Injection		No			No	No	No	No	No	Yes	No					No								No
2021-05-30 20:35:14	I Agree	Muni Saha	49	Female	Secondary	Urban	Astrazeneca	India	2021-02-27	Narsingdi Sadar hospital	First Dose	Injection		No			Could not identify	Low pressure, calcium deficiency	Calcium tablet	Calcium tablet	No	Yes	No					No								No
2021-05-30 20:37:25	I Agree	Kanak Saha	46	Female	Secondary	Rural	Astrozeneca	India	2021-02-27	Narsingdi Sadar hospital	First Dose	Injection		No			No	Allergy	Bilastin		Yes	Yes	No					No								No
2021-05-30 20:39:38	I Agree	Tonu Ranjan Saha	79	Male	Secondary	Urban	Astrozeneca	India	2021-02-27	Narsingdi Sadar hospital	First Dose	Injection		No			No	Hypertension	Antihypertensive	Same	No	No	No					No								No
2021-05-30 20:41:24	I Agree	Maloti Saha	33	Female	Secondary	Rural	Astrozeneca	India	2021-02-27	Narshingdi Sadar hospital	First Dose	Injection		No			No	High blood pressure	Antihypertensive	Antihypertensive	No	Yes	No					No								No
2021-05-30 20:43:50	I Agree	Mira Saha	57	Female	Secondary	Rural	Astrozeneca	India	2021-02-27	Narshingdi Sadar hospital	First Dose	Injection		No			No	Severe Allergy, high blood pressure	Antihypertensive, antiallergenic	Same	Yes	Yes	No					No								No
2021-05-30 20:45:16	I Agree	Bikash Saha	44	Male	Secondary	Rural	Astrozeneca	India	2021-02-27	Narsingdi Sadar hospital	First Dose	Injection		No			No	Hypertension	Antihypertensive	Same	No	No	No					No								No
2021-05-30 20:47:54	I Agree	Fulu Saha	39	Female	Secondary	Rural	Astrozeneca	India	2021-02-27	Narsingdi Sadar hospital	First Dose	Injection		No			No	Hypertension	Antihypertensive	Same	No	Yes	No					No								No
2021-05-30 20:50:19	I Agree	Monu Saha	50	Female	Secondary	Rural	Astrozeneca	India	2021-02-27	Narsingdi Sadar hospital	First Dose	Injection		No			No	High pressure, asthma	Antihypertensive	Antihypertensive	No	No	No					No								No
2021-05-30 20:53:25	I Agree	Ringku Saha	41	Male	Secondary	Rural	Astrozeneca	India	2021-02-27	Narsingdi Sadar hospital	First Dose	Injection		No			No	Diabetes	Antidiabetic	Antidiabetic	No	No	No					No								No
2021-05-30 20:54:59	I Agree	Ranjana Saha	69	Female	Primary	Rural	Astrozeneca	India	2021-02-27	Narsingdi Sadar hospital	First Dose	Injection		No			No	No				Yes	No					No								No
2021-05-30 20:56:15	I Agree	Molina Saha	81	Female	Primary	Urban	Astrozeneca	India	2021-02-27	Narshingdi sadar hospital	First Dose	Injection		No			No	No			No	Yes	No					No								No
2021-05-30 20:59:09	I Agree	Shahidul Islam	76	Male	Post graduate/Doctoral	Urban	Astrozeneca	India	2021-02-17	Govt karmachari Hospital	First Dose	Injection		No			Could not identify	High blood pressure	Antihypertensive	Same	No	No	No					Yes	Fever	After vaccination	No		Naturally	No	2 days after vaccination	No
2021-05-30 21:01:19	I Agree	Israt Jahan	55	Female	Post graduate/Doctoral	Urban	Astrozeneca	India	2021-03-18	Union health complex	First Dose	Injection		No			Could not identify	No				Yes	No					Yes	Fever	After vaccination	No		Took medicine	Yes	1/2 days	No
2021-05-30 21:02:28	I Agree	Monjurul Hoque	49	Male	Post graduate/Doctoral	Rural	Astrozeneca	India	2021-03-17	Manikganj Sadar hospital	First Dose	Injection		No			No	No				No	No					No								No
2021-05-31 10:53:54	I Agree	Bongshi Saha	47	Male	Graduate	Urban	Astrozeneca	India	11/2/0021	Bokkhobadhi Hospital, Dhaka	First Dose	Injection		No			No	High pressure	Antihypertensive	Antihypertensive	No	No	No					No								No
2021-05-31 11:00:26	I Agree	Sumi Roy	36	Female	Graduate	Urban	Astrozeneca	India	2021-02-20	Bokkhobadhi Hospital, Dhaka	First Dose	Injection		No			No	Hypertension	Antihypertensive	Antihypertensive	Dust Allergy	Yes	No					Yes	Fever	The day of vaccination	No		Of it own	No	7 days	No
2021-05-31 11:08:14	I Agree	Sanchita basak	54	Female	Post graduate/Doctoral	Urban	Astrozeneca	India	2021-02-14	Tangail Medical College	First Dose	Injection		No			No	No	No	No	Dust Allergy	Yes	No					Yes	Pain at the site of Injection	The day of vaccination	No		If it own	No	2 days	No
2021-05-31 11:10:27	I Agree	Dilip Basak	50	Male	Graduate	Urban	Astrozeneca	India	2021-02-10	Tangail Medical College	First Dose	Injection		No			No	No	No	No	No	No	No					No								No
2021-05-31 11:14:22	I Agree	Khitish Paul	39	Male	Higher Secondary	Urban	Astrozeneca	India	2021-04-06	Union Health Complex	First Dose	Injection		No			No	No	No	No	Cold Allergy	No	No					No								No
2021-05-31 11:18:10	I Agree	Poritosh Paul	43	Male	Secondary	Urban	Astrozeneca	India	2021-04-06	Union health complex	First Dose	Injection		No			No	Blood pressure, diabetes	Antihypertensive, anti diabetic	Antihypertensive, anti diabetic	No	No	No					No								No
2021-05-31 11:21:45	I Agree	Maloti Paul	79	Female	Primary	Urban	Astrozeneca	India	2021-04-06	Union health complex	First Dose	Injection		No			No	No	No	No	No	Yes	No					No								No
2021-05-31 11:26:03	I Agree	Jotish Chandra Paul	64	Female	Primary	Urban	Astrozeneca	India	2021-04-06	Union health complex	First Dose	Injection		No			No	No	No	No	No	No	No					No								No
2021-05-31 11:30:40	I Agree	Bandana Rani Paul	32	Female	Secondary	Urban	Astrozeneca	India	2021-04-06	Union health complex	First Dose	Injection		No			No	Caugh	Caugh medicine	Caugh medicine	No	Yes	No					No								No
2021-05-31 11:33:12	I Agree	Bosonto Kumar Paul	63	Male	Secondary	Urban	Astrozeneca	India	2021-04-06	Union health complex	First Dose	Injection	No	No			No	Hypertension, caugh	Antihypertensive, caugh medicine	Antihypertensive, caugh medicine	No	No	No					No								No
2021-05-31 11:35:52	I Agree	Sipra Paul	60	Female	Primary	Urban	Astrozeneca	India	2021-04-06	Union health complex	First Dose	Injection		No			No	Kidney dysfunction, diabetes	Neohroprotective,antidiabetic	Neohroprotective,antidiabetic	No	Yes	No					No								No
2021-05-31 11:39:33	I Agree	Kartik Chandra paul	78	Male	Graduate	Urban	Astrozeneca	India	2021-04-06	Union Health complex	First Dose	Injection		No			No	Diabetes	Antidiabetic	Antidiabetic	Cold Allergy	No	No					No								No
2021-05-31 11:43:30	I Agree	Shovon paul	55	Male	Secondary	Urban	Astrozeneca	India	2021-04-06	Union health complex	First Dose	Injection		No			No	Kidney dysfunction, diabetes	Cardioprotective,antidiabetic	Cardioprotective,antidiabetic	No	No	No					No								No
2021-05-31 14:47:50	I Agree	Rebecca Banoo	83	Female	Post graduate/Doctoral	Urban	Covisheild Serum Institute	India	2021-02-20	Kuit Maitre hospital, Uttara	First Dose	Injection	There may be little pain, or head ache, second dose after two months	No			No	Gall bladder stone & a stainting in the heart	Ecospirin 75 mg, Ticarel 90 mg, bisprolol 2.5mg, Atova 10, Coversyl 2mg, pentobex 20 ( twice a day)	Yes, as above.	Yes, red colour.	Yes	No	Not applicable	No			Yes	Pain at the site of Injection	In the evening	No	Paracetamol		Yes	Two days	No
2021-05-31 15:39:31	I Agree	Md.Monirizzaman	54	Male	Higher Secondary	Rural	Fizar	U.K	2021-04-26	BSMU	Second Dose	Injection		Yes			Could not identify	Diabetes				No	No		No	No	No	No								No
2021-05-31 15:44:25	I Agree	Md. Khairul Baker	63	Male	Post graduate/Doctoral	Urban	Astrazeneca	India	2021-02-18	BSMMU	Second Dose	Injection	No	Yes	Flavipiravir Cefixime Doxycycline Montelukast Doxophylline Zinc Vit-c	No	Could not identify	Hypothyroidism, vertigo	Levothyrixine		No	No	No					Yes	Pain at the site of Injection, Fever, Vertigo (dizziness), Body pain	After 8 hrs of vaccination	No		Automatically	No	2days	No
2021-05-31 15:52:27	I Agree	Parul Akter	60	Female	Graduate	Urban	Astrazeneca	India	2021-03-13	Azimpur Maternity Hospital	Second Dose	Injection	No	Yes	Flavipiravir Cefixime Steroid IV Montelukast Doxycycline Doxophylline Zinc Vit C	No	Could not identify	Hypertension	Losartan 50mg, menaril 8mg	Losartan 50, menaril 8mg	No	No	No					Yes	Pain at the site of Injection, Fever	12hrs after vaccination	No		Taking paracetamol	Yes	2-3 days	No
2021-05-31 19:09:33	I Agree	MANJURI HAQUE	49	Female	Graduate	Urban	Serum Institute	India	2021-04-12	Tejgaon ENT hospital, Dhaka	Second Dose	Injection		No			No	No				No	No		No			Yes	Pain at the site of Injection, Fever	After 8-10 hours	No			No		No
2021-05-31 20:48:43	I Agree	Saleha Islam	30	Female	Graduate	Foreign	Pfizer	USA	2020-01-28	London Ontario, Canada	Second Dose	Injection	If high fever, should go to ER	No			No	No		Tylenol 500mg	No	No	Yes	No	No		No	yes	Pain at the site of Injection, Body pain	After 4 hours	No			Yes	After 48 hours	No
2021-06-01 07:46:26	I Agree	Md. Farhad Hossain	24	Male	Graduate	Rural	Fosun Pharma	USA	2021-08-05	Queen Eligabeth Stadium	First Dose	Injection		No			No	No	No	No	No	No	No	No				Yes	Body pain	1 days later	No	No		Yes	2 days	No
2021-06-02 00:18:56	I Agree	Tasfiah Tahsin Prima	29	Female	Undergrade	Urban	Astrazeneca	India	2021-02-20	Khulna	Second Dose	Injection		Yes			No	I didn't have any disease				No	No		No		No	Yes	Pain at the site of Injection, Swelling, Fever, Body pain	after 12 hours of vaccination	No			Yes	1 week	No
2021-06-02 12:33:26	I Agree	তানজিনা হোসেন চৈতী	20	Female	Graduate	Urban	serum Institute	India	2021-04-20	Burn Institute	First Dose	Injection		Yes	Peracitamle, zinc, vitamin c		Could not identify	No	No	No	Slightly	No	No	No	No	No	No	Yes	Pain at the site of Injection, Fever, Vertigo (dizziness), Drowsiness, Decreased appetite, Body pain	From 4 hours after being vaccinated	No			Yes	It took 3/4 days to cover up my illness. I felt weak and drowsy. Faced less appetite	Yes
2021-06-02 19:30:45	I Agree	Belayet mridha	48	Male	Undergrade	Rural	Astrozeneca	India	2021-04-03	Jhalakathi Sadar hospital	First Dose	Injection		No			No	Pressure, heart problem	Antihypertensive, cardio protective, skin problem		No	Yes	No					No								No
2021-06-02 19:34:44	I Agree	Shahida Aktar	56	Female	Higher Secondary	Rural	Astrozeneca	India	2021-04-10	Jhalakathi Sadar hospital	First Dose	Injection		No			Yes	Asthma	Drug for asthma	Same	Yes	Yes	No					Yes	Pain at the site of Injection, Fever	After vaccination	No		Took medicine	Yes	2/3days after vaccination	No
2021-06-03 14:21:12	I Agree	Bilkis Sultana	33	Female	Post graduate/Doctoral	Urban	Astrozeneca	India	2021-02-14	Sonargaon Upazilla Health Complex	First Dose	Injection	No	No			No	No		No	Yes	No	No		No	No	No	No			No			No		Yes
2021-06-03 14:24:18	I Agree	Shyful Islam Ripon	41	Male	Post graduate/Doctoral	Urban	Astrozeneca	India	2021-02-14	Sonargaon Upazilla Health Complex	First Dose	Injection	No	No			No	No			Yes	No	No		No	No	No	No								No
2021-06-03 16:40:03	I Agree	Md. Bokhtear Sarkar	49	Male	Post graduate/Doctoral	Urban	Astrazeneca	UK	2021-06-03	DMCH	Second Dose	Injection		No				No										No								No
2021-06-03 16:48:43	I Agree	Hasan Hafijur Rahman	40	Male	Graduate	Rural	Serum Institute	India	2021-02-23	Chapai Sadar Hospital	First Dose	Injection		No			No	No	No			Yes	Yes	No	No			No								No
2021-06-03 21:18:41	I Agree	Anika Tabassum Obonti	25	Female	Graduate	Urban	Serum Institute	India	2021-04-13	Kurmitola Hospital , Dhaka	Second Dose	Injection	No	No			Yes	No	No	No	Yes!! Dust Allergy	Yes	No		No		No	yes	Fever	After 7 hours of vaccinated, mild fever	No		Took medicine & adequate of rest	Yes	Around 1-2 days	No
2021-06-06 12:56:21	I Agree	DS	47	Female	Graduate	Urban	Astrozenaca	India	2021-04-10	Dhaka	Second Dose	Injection	About Adverse effects like pain and fever	No				No				Yes	No					No								No
2021-06-06 13:00:28	I Agree	TS	53	Male	Graduate	Urban	Astrozeneca	India	2021-04-10	Jashore	Second Dose	Injection	About adverse effects like pain and fever	No			No	No	No	No	No	Yes	No					No								No
2021-06-06 13:10:29	I Agree	CS	64	Male	Graduate	Urban	Astrozeneca	India	2021-04-10	Jashore	Second Dose	Injection	Adverse effects related info	No			No	Diabetes	Metformin	Metformin	No	Yes	No					No								No
2021-06-06 13:13:00	I Agree	SS	47	Female	Graduate	Urban	Astrozeneca	India	2021-04-10	Jashore	Second Dose	Injection	About adverse effects like pain and fever	No			No	No				Yes	No					No								No
2021-06-06 13:15:20	I Agree	TS	43	Male	Graduate	Urban	Astrozeneca	India	2021-04-10	Dhaka	Second Dose	Injection	About adverse effects like pain and fever	No			No	No				Yes	No					No								No
2021-06-06 13:18:11	I Agree	CS	54	Male	Graduate	Urban	Astrozeneca	India	2021-04-10	Dhaka	Second Dose	Injection		No			No	No				Yes	No					No								No
2021-06-07 17:50:06	I Agree	Zohra Begum	39	Female	Undergrade	Urban	AstraZeneca,University of Oxford	India	2021-02-09	Mugda General Hospital	Second Dose	Injection	I can't remember exactly	No			No	No				No	No		No		No	No								No
2021-06-07 23:15:39	I Agree	Sohanul Islam	24	Male	Undergrade	Urban	Serum Institute of india	India	2021-02-24	Shahid Showardi medical college and hospital	Second Dose	Injection	No	No			Yes	No	No	No	No	Yes	No		No		No	Yes	Irritation at the site of Injection, Fever, Body pain	After vaccination	No	By taking paracetamol		Yes	3 days	No
2021-06-08 09:37:53	I Agree	Nusrat Jahan	20	Female	Post graduate/Doctoral	Urban	Serum Institute	India	2021-02-25	National Institute of Cancer Research Hospital	First does	Injection	No	Yes	Ivermectin, Doxycline, vitamin C, Zinc, Viamin D, Montelukast	No	No	No	No	No	No	Yes	No		No	No	No	Yes	Pain at the site of Injection, Burning sensation, Vertigo (dizziness)	2nd day after vaccination	No		Just naturally	No	3/4 days	No
2021-06-08 22:00:40	I Agree	Tasneem Ara Ferdousi	29	Female	Graduate	Urban	Covishield Serum Institute	India	2021-11-05	Dhaka	Second Dose	Injection		No			No	No	No	No	No	No	No		No	No	No	Yes	Pain at the site of Injection, Fever, Vertigo (dizziness), Body pain	After vaccination	No			Yes		No
2021-06-10 13:59:43	I Agree	Arup Dey	38	Male	Graduate	Foreign	Pfizer	USa	2021-04-14	Thrifty White Pharmacy, Fargo, ND, USA	Second Dose	Injection		No			No	No				Yes	No		No			Yes	Pain at the site of Injection, Fever	Pain at the site of injection was after first dose, Fever and pain were after the 2nd dose	No			Yes	2 Days	No
2021-06-11 01:51:15	I Agree	Abdul Razzak	49	Male	Graduate	Rural	Astrazeneca	India	2021-06-10	Voirob health complex	Second Dose	Injection		No			No	Diabetes	Insulin	Insulin	No	Yes	No					Yes	Pain at the site of Injection, Body pain	After vaccination	No		Took medicine	Yes	Approximately 24 hrs after vaccination	No
2021-06-13 00:58:12	I Agree	Abu sadat muhammad mafidul islam	51	Male	Graduate	Urban	COVISHIELD, Serum institution	India	2021-06-12	BSMMU	Second dose	Injection	Not applicable	No			Yes	Fever, cough	Paracetamol, desloratadine	No	No	No	No	Not applicable				No								No
2021-06-14 13:26:49	I Agree	Sabuja Akter	32	Female	Secondary	Urban	Serum institute	India	2021-03-01	Kurmitola hospital	Second Dose	Injection	No	No			Yes	no	no		yes	No	No	NA	No	No	No	No								No
2021-06-14 13:33:47	I Agree	A N M Taufiq Elahi	21	Male	Post graduate/Doctoral	Foreign	Moderna	USA	2021-03-24	Salt Lake City	Second Dose	Injection	informed me to stay there for 30 minutes	No			No	no	yes, paracetamol for toothache	Paracetamol for fever and pain induced by vaccination	no	No	No	not applicable	No	No	No	Yes	Pain at the site of Injection, Swelling, Fever, Drowsiness, Body pain	after vaccination both for fisrt dose and second dose	No			Yes	for one week	No
2021-06-14 13:47:31	I Agree	Aruna Dontabhaktuni	38	Female	Post graduate/Doctoral	Foreign	Pfizer	USA	2021-04-02	Medical Centre	Second Dose	Injection	stay 15 minutes at the nearby sides	Yes	Paracetamol, my symptoms was asymptomatic		No	No			Yes, I have pollen allergy	No	No	No	No	No	No	Yes	Pain at the site of Injection, Swelling, Fever, Vertigo (dizziness)	at the night of vaccination	No			No	3 to 4 days	No
2021-06-15 02:24:10	I Agree	Md. Tanjir Hossain	45	Male	Post graduate/Doctoral	Urban	AstraZeneca	Oxford, UK	2021-02-16	Gafargaon Upazila Health Complex	Second Dose	Injection	No	No			No	High blood pressure	Xiotil-20 twice-daily			Yes	No					No								No
2021-06-15 16:38:02	I Agree	Zahra Tasnim	29	Female	Undergrade	Urban	Sinopharma	China	2021-05-25	Suhrawardy medical college	First Dose	Injection	No	No			No	No	No	Yes,paracetamol	No	Yes	No		No		No	No								No
2021-06-15 19:54:30	I Agree	Tithi Halder	20	Female	Undergrade	Urban	Sinopharm	China	2021-05-25	Shaheed Suhrawardy Medical College	First Dose	Injection	30 min rest after vaccination to see whether it shows side effects.	Yes	1.Tab.Fexo 120 mg 0+0+1 2.Tab. Monas 10 mg 0+0+1 4.Tab. Cevit 1+0+1	No		No	No	No	No	Yes	No		No		No	yes	Drowsiness	Reaching home after vaccination	No		Taking rest & sleep	No	3-4 days	No
2021-06-19 13:13:14	I Agree	Md.shahidul Islam jony	26	Male	Undergrade	Urban	Astrazenica	England	2021-03-14	CMH Dhaka	Second Dose	Injection		No			No	No	No	Yes paracetamol	No	No	No		No		No	No								No
2021-06-19 13:57:44	I Agree	Shahin	47	Male	Post graduate/Doctoral	Urban	Covi shield	Uk	2021-02-15	Kormochari haspital,Dhaka	Second Dose	Injection	No	No			Could not identify	No				No	No		No		No	No								No
2021-06-19 14:11:47	I Agree	Kh. Salmun Ahmed	33	Male	Graduate	Rural	Covishield	India	2021-02-16	Alamdanga Upazila Health Complex	Second Dose	Injection		No			No	no			yes, cold allergy	No	No					Yes	Pain at the site of Injection, sleepless	after vaccination	Yes	taking bed rest		No	about 3 months	Yes
2021-06-19 14:46:50	I Agree	Tanbir Ashraf	58	Male	Post graduate/Doctoral	Urban	Astrazeneca	India	2021-02-16	NICVD	Second Dose	Injection		No			No	No				Yes	Yes	No				No								No
2021-06-19 15:18:22	I Agree	Tamanna Sultana	30	Female	Post graduate/Doctoral	Urban	AstraZeneca	India	2021-04-07	Dental College Mirpur	Second Dose	Injection	May feel feverish	No			No	hypothyroid				No	No		No		No	No								No
2021-06-19 15:20:52	I Agree	Md. Husnul Karim	59	Male	Post graduate/Doctoral	Urban	Serum Institute	India	2021-03-03	Shek Rasel Gastoliver Hospital, Mohakhali, Dhaka	Second Dose	Injection		No			No	No	No	No	No	No	No					No								No
2021-06-19 15:28:59	I Agree	Jerin Tamanna	23	Female	Post graduate/Doctoral	Urban	Serum Institute	Bangladesh	2022-03-06	Dhaka	First Dose	Injection		No			Could not identify	No							No			No								No
2021-06-19 15:30:09	I Agree	Halima Akther	35	Female	Graduate	Urban	AstraZeneca	India	2021-03-08	Mohammadpur fertility center	Second Dose	Injection	Nothing	Yes	Calcium, Vitamin D, Vitamin C, Paracetamol, Ivermectin	No	Could not identify	no	no	paracetamol	no	No	No	nothing	No		Yes	Yes	Pain at the site of Injection, Irritation at the site of Injection, Itching, Fever, Vertigo (dizziness), Body pain	Second day of vaccination	No		Automatically	Yes	1 day	No
2021-06-19 23:06:47	I Agree	SHAHEEN MAHMUD	40	Male	Post graduate/Doctoral	Urban	AstraZeneca	Uk	2021-04-22	Keranigonj	Second Dose	Injection	No	Yes	No medicine		No	No	No	No	No	No	No		No			No								No
2021-06-20 00:38:12	I Agree	Md. Idris Akon	28	Male	Secondary	Rural	AstraZeneca	China	2021-05-11	Muladi	Second Dose	Injection		No			No	No	No	Yes. E-cap	Yes.	Yes	No					Yes	Fever	After 10-12 hours of vaccine	No		Normally.	No	7 days	No
2021-06-20 00:43:18	I Agree	মোস্তাফিজুর রহমান	20	Male	Higher Secondary	Rural	Serum Institute	India	2021-04-08	Bakergong	Second Dose	Injection		No			Could not identify	No	No	No	No	No	No					Maybe	Not sure.	After 1 day of vaccination	No			No	5-6 days	No
2021-06-20 05:05:04	I Agree	Akhtaruzzaman	56	Male	Graduate	Urban	Astrageneka	India	2021-04-10	Munshiganj sadar hospital	Second Dose	Injection	I could not remember	Yes	Napa, Agith, antihistamine	N/A		No	Atova, osertil	No	No	No	No		No			Yes	Pain at the site of Injection, Body pain	3/4 hour after vaccination	No		All problems gone after 2/3 days	Yes	2/3 days	No
2021-06-20 22:28:07	I Agree	Nahid Sharmin	41	Female	Post graduate/Doctoral	Urban	Oxford-AstraZeneca	India	2021-04-20	BSMMU	Second Dose	Injection	Was advised to wait for 30 minutes	No			Could not identify	Diabetes, hypertension	Yes, antidiabetic, anti-hypertensive	Yes, antidiabetic, anti-hypertensive	Yes, against food, dust, metal and sunlight	Yes	No		No		No	Yes	Pain at the site of Injection, Fever, Nausea, Vertigo (dizziness), Decreased appetite, Body pain	Within two hours of the first dose, but did not face any problem after the second dose	No		I took paracetamol and proper rest	Yes	for 2 days	Yes
2021-06-21 00:29:00	I Agree	Md. Nayeem Islam	25	Male	Higher Secondary	Rural	Serum Institute	India	2021-03-10	Madaripur	Second Dose	Injection		No			No	No	No	No	Maybe.Not sure	No	No					No								No
2021-06-21 00:33:04	I Agree	Muslima Khatun	21	Female	Higher Secondary	Rural	Serum Institute	India	2021-03-07	Satkhira	Second Dose	Injection		No			No	No	No	No	No	No	No		No			yes	Fever	After 12-24 hours of vaccination	No			Yes	After taking medicine	No
2021-06-22 20:44:55	I Agree	Ruksana akter	29	Female	Undergrade	Rural	Serum Institute	India	2021-06-21	Cumilla medical college	First Dose	Injection	No	No			No	No	No	No	No	No	No		No		No	No								No
